# Supplementary material for: Highly enantioselective allylic amination reaction through aerobic oxidative organo–organo dual catalytic system
Source: Royal Society of Chemistry journal article supplement (doi:10.1039/d4nj00478g), 2024-01-01
Supplement: d4nj00478g1.pdf [file d4nj00478g1.pdf]

## Supporting Information

### Highly Enantioselective Allylic Amination Reaction through Aerobic Oxidative Organo-Organo Dual Catalytic System

Chengli Mou,<sup>‡a</sup> Guangping Liang,<sup>‡c</sup> Peiyao Liang,<sup>b</sup> Siyi Chen,<sup>b</sup> Chong Wu,<sup>\*a</sup>  
Shenghan Teng,<sup>\*b</sup> and Shoulei Wang<sup>\*b</sup>

- a. School of Pharmacy, Guizhou University of Traditional Chinese Medicine, Guiyang 550025, China.
  - b. Strait Laboratory of Flexible Electronics (SLoFE), Strait Institute of Flexible Electronics (SIFE, Future Technologies), Fujian Normal University, Fuzhou 350117, China
  - c. Department of Pharmacy, Zunyi Medical and Pharmaceutical College, Zunyi 563006, China.
- ‡ These authors contributed equally to this work

wuchongchem@163.com; ifeshhteng@fjnu.edu.cn; ifeshlwang@fjnu.edu.cn

### Table of Contents

|                                                                       |     |
|-----------------------------------------------------------------------|-----|
| 1. General information                                                | S1  |
| 2. Screening of reaction conditions                                   | S2  |
| 3. General procedure for the synthesis of <b>3</b> and <b>4</b>       | S3  |
| 4. Control experiments                                                | S3  |
| 5. Stereochemistry determination and X-ray structures                 | S4  |
| 6. Compound characterization                                          | S5  |
| 7. <sup>1</sup> H, <sup>13</sup> C, <sup>19</sup> F NMR and HPLC data | S20 |
| 8. References                                                         | S79 |

## 1. General information

Commercially available materials purchased from Alfa Aesar or Sigma-Aldrich were used as received. Proton nuclear magnetic resonance ( $^1\text{H}$  NMR) spectra were recorded on a Bruker BBFO (400 MHz) spectrometer. Chemical shifts were recorded in parts per million (ppm,  $\delta$ ) relative to tetramethylsilane ( $\delta$  0.00) or chloroform ( $\delta$  = 7.26, singlet).  $^1\text{H}$  NMR splitting patterns are designated as s (singlet), d (doublet), t (triplet), q (quartet), dd (doublet of doublets); m (multiplet), and etc. All first-order splitting patterns were assigned on the basis of the appearance of the multiplet. Splitting patterns that could not be easily interpreted are designated as m (multiplet) or br (broad). Carbon nuclear magnetic resonance ( $^{13}\text{C}$  NMR) spectra were recorded on a Bruker BBFO (100 MHz) spectrometer. High resolution mass spectral analysis (HRMS) was performed on Finnigan MAT 95 XP mass spectrometer (Thermo Electron Corporation). The determination of ee was performed via chiral HPLC analysis using Shimadzu LC-20AD HPLC workstation. X-ray crystallography analysis was performed on Bruker X8 APEX X-ray diffractometer. Optical rotations were measured using a 1 mL cell with a 1 dm path length on a Jasco P-1030 polarimeter and are reported as follows:  $[\alpha]_{\text{D}}^{25}$  ( $c$  in g per 100 mL solvent). Analytical thin-layer chromatography (TLC) was carried out on Merck 60 F254 pre-coated silica gel plate (0.2 mm thickness). Visualization was performed using a UV lamp.

## 2. Screening of reaction conditions<sup>[a]</sup>

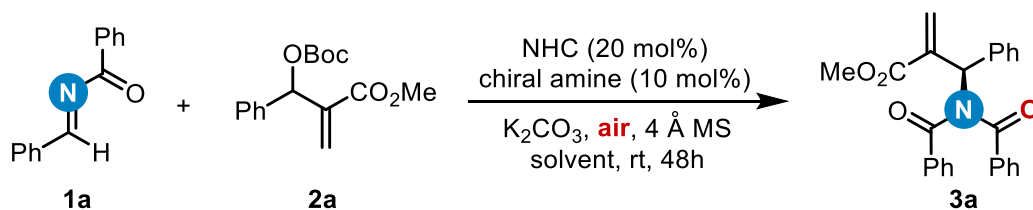

| Entry             | NHC   | Chiral amine             | Solvent                         | Yield (%) <sup>[b]</sup> | ee (%) <sup>[c]</sup> |
|-------------------|-------|--------------------------|---------------------------------|--------------------------|-----------------------|
| 1                 | NHC-A | quinine                  | DCE                             | 45                       | 28                    |
| 2                 | NHC-A | cinchonine               | DCE                             | 40                       | 8                     |
| 3                 | NHC-A | quinidine                | DCE                             | 37                       | 3                     |
| 4                 | NHC-A | cinchonidine             | DCE                             | 65                       | 67                    |
| 5                 | NHC-A | (DHQD) <sub>2</sub> PYR  | DCE                             | 72                       | 94                    |
| 6                 | NHC-A | (DHQD) <sub>2</sub> PHAL | DCE                             | 63                       | 30                    |
| 7                 | NHC-B | (DHQD) <sub>2</sub> PYR  | DCE                             | 56                       | 94                    |
| 8                 | NHC-C | (DHQD) <sub>2</sub> PYR  | DCE                             | 48                       | 94                    |
| 9                 | NHC-D | (DHQD) <sub>2</sub> PYR  | DCE                             | 62                       | 94                    |
| 10                | NHC-A | (DHQD) <sub>2</sub> PYR  | CH <sub>2</sub> Cl <sub>2</sub> | 68                       | 93                    |
| 11                | NHC-A | (DHQD) <sub>2</sub> PYR  | CHCl <sub>3</sub>               | 70                       | 78                    |
| 12                | NHC-A | (DHQD) <sub>2</sub> PYR  | Toluene                         | 67                       | 88                    |
| 13                | NHC-A | (DHQD) <sub>2</sub> PYR  | THF                             | 70                       | 92                    |
| 14 <sup>[d]</sup> | NHC-A | (DHQD) <sub>2</sub> PYR  | DCE                             | 51                       | 93                    |
| 15 <sup>[e]</sup> | NHC-A | (DHQD) <sub>2</sub> PYR  | DCE                             | 74                       | 81                    |
| 16 <sup>[f]</sup> | NHC-A | (DHQD) <sub>2</sub> PYR  | DCE                             | <b>90</b>                | <b>94</b>             |
| 17 <sup>[g]</sup> | NHC-A | (DHQD) <sub>2</sub> PYR  | DCE                             | 0                        | -                     |

[a] General conditions (unless otherwise specified): **1a** (0.1 mmol), **2a** (0.15 mmol), NHC pre-cat. (20 mol%), chiral amine (10 mol%), 4 Å MS (50 mg), K<sub>2</sub>CO<sub>3</sub> (1.0 equiv), solvent (1.0 mL), rt, open to air, 48 h. [b] Isolated yield. [c] Determined by chiral HPLC. [d] 0.5 eq. K<sub>2</sub>CO<sub>3</sub>. [e] 1.5 eq. K<sub>2</sub>CO<sub>3</sub>. [f] Run at 50 °C. [g] Under N<sub>2</sub> atmosphere

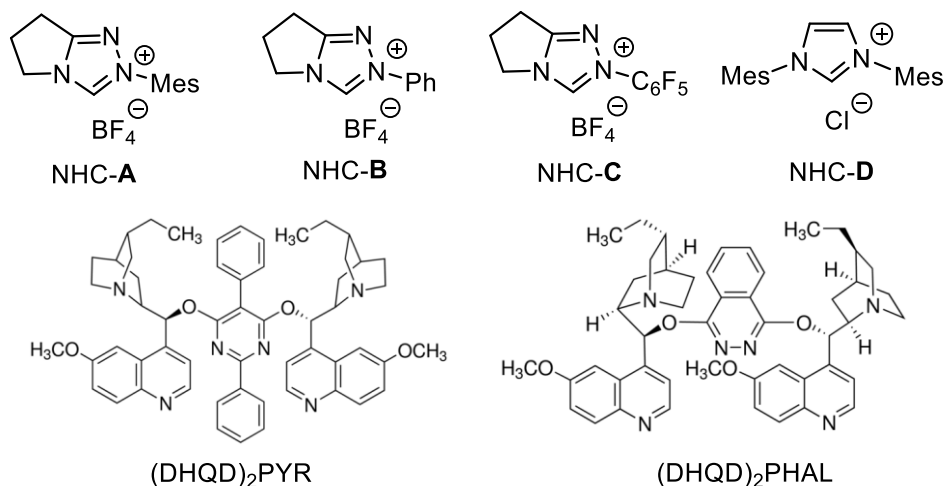

### 3. General procedure for the synthesis of **3** and **4**

To a dry tube equipped with a magnetic stirring bar, was added **1** (0.1 mmol), **2** (0.15 mmol), NHC precatalyst salt **A** (0.02 mmol), 4 Å MS (50 mg), K<sub>2</sub>CO<sub>3</sub> (1.0 equiv) and DCE (1 mL). The reaction was opened to air and stirred at 50 °C for 48 h till **1a** was completely consumed (monitored by TLC). After that, the crude residue were purified by flash chromatography to afford the desired products **3** or **4**, which were confirmed by <sup>1</sup>H NMR, <sup>13</sup>C NMR spectrum.

### 4. Control experiments<sup>[1]</sup>

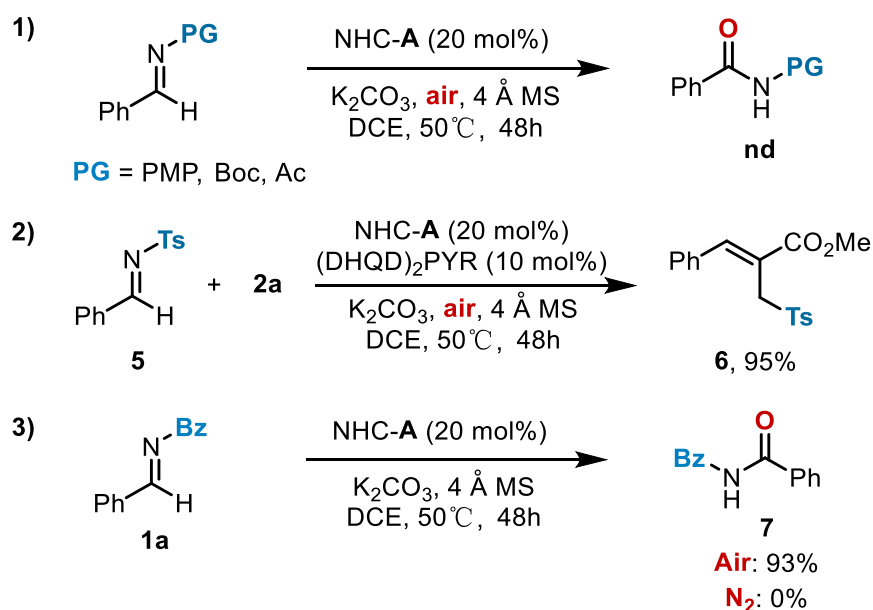

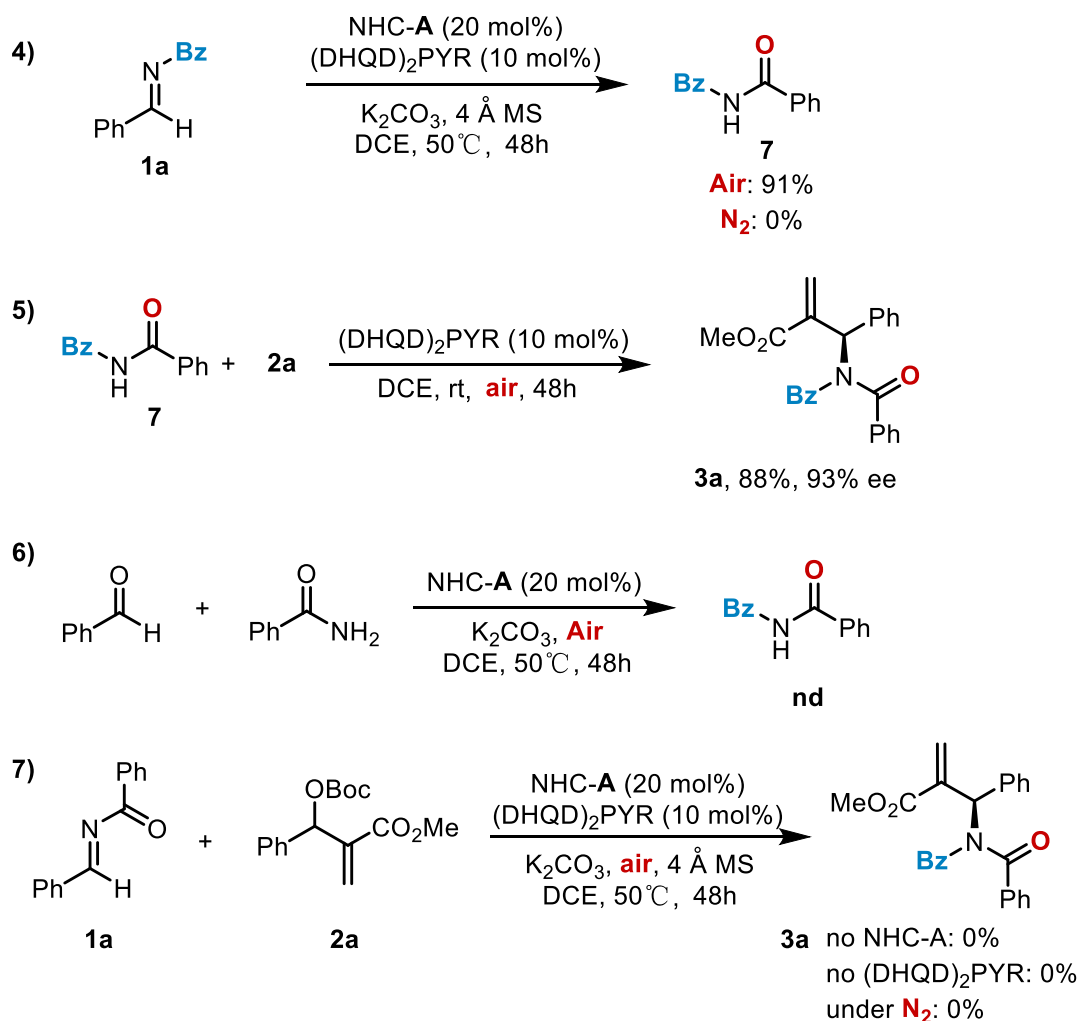

All reactions performed on a 0.1 mmol scale, general conditions:  $K_2CO_3$  (1.0 equiv), DCE (0.1 M), 4 Å MS (50 mg).

## 5. Stereochemistry determination and X-ray structures

Absolute configurations of the products **3** and **4** were assigned based on the crystal X-ray structures of **4j** (CCDC number 2287548) which was obtained as colorless needles *via* evaporation of a hexane/ $CH_2Cl_2$  solution. These data can be obtained free of charge from The Cambridge Crystallographic Data Centre via [www.ccdc.cam.ac.uk/data\\_request/cif](http://www.ccdc.cam.ac.uk/data_request/cif).

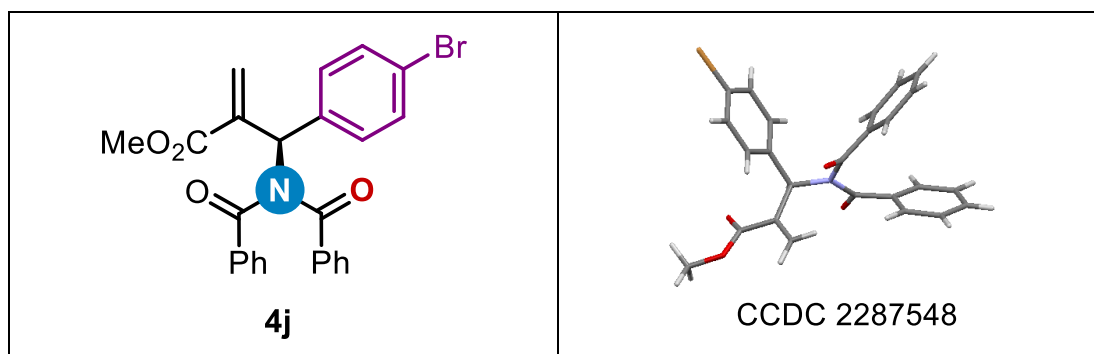

## 6. Compound characterization

### Methyl (*R*)-2-((*N*-benzoylbenzamido)(phenyl)methyl)acrylate (**3a**)

Product **3a** was obtained 35.9 mg in 90 % yield as white solid. mp: 111- 112°C,  $[\alpha]_D^{25} = + 74.1$  ( $c = 1.0$  in  $\text{CHCl}_3$ ).

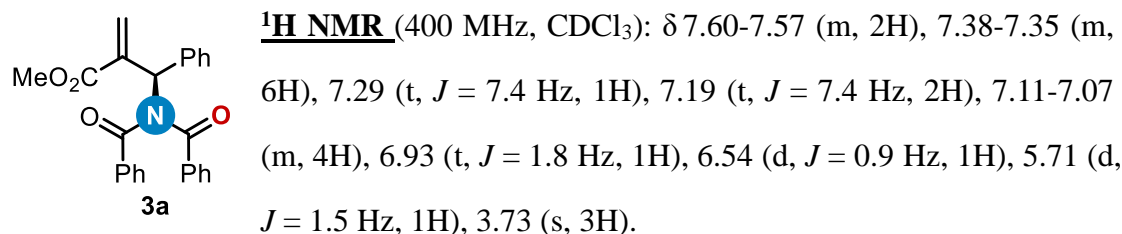

**$^{13}\text{C NMR}$**  (100 MHz,  $\text{CDCl}_3$ ):  $\delta$  173.5, 166.5, 139.1, 137.7, 137.4, 131.7, 129.5, 129.1, 128.8, 128.6, 128.1, 128.0, 61.6, 52.1.

**HRMS** (ESI,  $m/z$ ): calcd. For  $\text{C}_{25}\text{H}_{22}\text{NO}_4$   $[\text{M}+\text{H}]^+$ : 400.1543, found: 400.1542;

**HPLC analysis**: 94% ee, [CHIRALPAK ODH column; 0.5 mL/min; solvent system: *i*-PrOH/hexane = 5:95; retention times: 24.2 min (minor), 41.6 min (major)].

### Methyl (*R*)-2-((*N*-benzoyl-2-fluorobenzamido)(phenyl)methyl)acrylate (**3b**)

Product **3b** was obtained 37.1 mg in 89 % yield as colorless oil.  $[\alpha]_D^{25} = + 40.3$  ( $c = 1.0$  in  $\text{CHCl}_3$ )

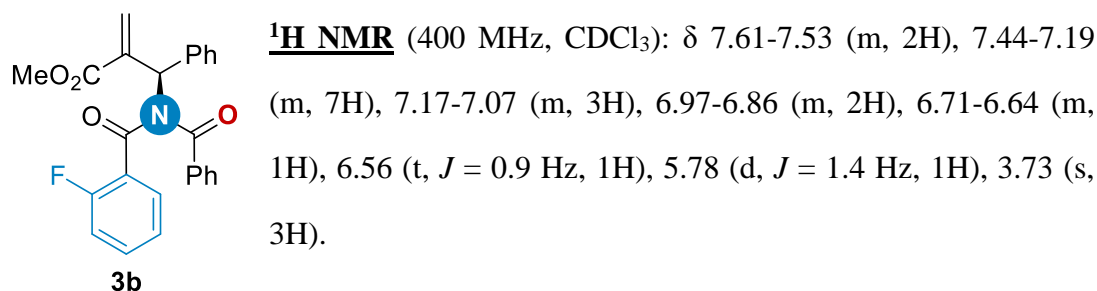

**<sup>13</sup>C NMR** (100 MHz, CDCl<sub>3</sub>): δ 173.2, 168.2, 166.5, 160.0, 157.5, 138.8, 137.3, 136.7, 133.1, 133.0, 132.0, 129.9, 129.9, 129.6, 129.1, 128.7, 128.5, 128.1, 128.0, 125.8, 125.6, 123.9, 123.9, 115.9, 115.7, 61.2, 52.1.

**<sup>19</sup>F NMR** (376 MHz, CDCl<sub>3</sub>): δ – 111.5.

**HRMS** (ESI, m/z): calcd. For C<sub>25</sub>H<sub>21</sub>FNO<sub>4</sub> [M+H]<sup>+</sup>: 418.1449, found: 418.1451;

**HPLC analysis:** 92% ee, [CHIRALPAK ODH column; 0.5 mL/min; solvent system: *i*-PrOH/hexane = 5:95; retention times: 26.0 min (minor), 35.4 min (major)].

### Methyl (*R*)-2-((*N*-benzoyl-2-chlorobenzamido)(phenyl)methyl)acrylate (**3c**)

Product **3c** was obtained 37.2 mg in 86 % yield as colorless oil. [ $\alpha$ ]<sub>D</sub><sup>25</sup> = + 62.4 (*c* = 1.0 in CHCl<sub>3</sub>)

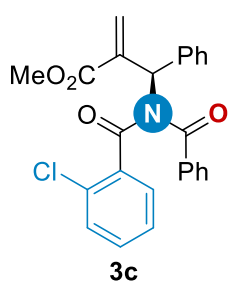

**<sup>1</sup>H NMR** (400 MHz, CDCl<sub>3</sub>): δ 7.60 (d, *J* = 7.4 Hz, 2H), 7.39-7.35 (m, 4H), 7.32-7.28 (m, 1H), 7.25-7.19 (m, 2H), 7.14 (t, *J* = 7.4 Hz, 2H), 7.05-7.02 (m, 2H), 6.99-6.95 (m, 1H), 6.90 (t, *J* = 1.9 Hz, 1H), 6.55 (d, *J* = 1.1 Hz, 1H), 5.74 (s, 1H), 3.74 (s, 3H).

**<sup>13</sup>C NMR** (100 MHz, CDCl<sub>3</sub>): δ 173.7, 169.1, 166.5, 138.7, 137.3, 137.1, 136.1, 132.5, 131.8, 131.4, 130.4, 129.5, 129.3, 129.1, 128.6, 128.4, 128.2, 128.1, 126.2, 61.2, 52.2.

**HRMS** (ESI, m/z): calcd. For C<sub>25</sub>H<sub>21</sub>ClNO<sub>4</sub> [M+H]<sup>+</sup>: 434.1154, found: 434.1155;

**HPLC analysis:** 92% ee, [CHIRALPAK ODH column; 0.5 mL/min; solvent system: *i*-PrOH/hexane = 10:90; retention times: 17.1 min (minor), 20.5 min (major)].

### Methyl (*R*)-2-((*N*-benzoyl-3-fluorobenzamido)(phenyl)methyl)acrylate (**3d**)

Product **3d** was obtained 35.9 mg in 86 % yield as colorless oil. [ $\alpha$ ]<sub>D</sub><sup>25</sup> = + 126.7 (*c* = 1.0 in CHCl<sub>3</sub>)

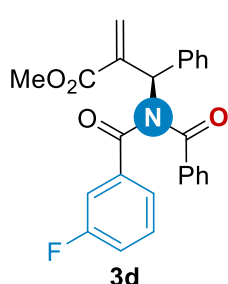

**<sup>1</sup>H NMR** (400 MHz, CDCl<sub>3</sub>): δ 7.57 (d, *J* = 7.2 Hz, 2H), 7.42-7.20 (m, 6H), 7.18-7.00 (m, 5H), 6.90-6.84 (m, 2H), 6.54 (d, *J* = 1.1 Hz, 1H), 5.68 (d, *J* = 1.6 Hz, 1H), 3.74 (s, 3H).

**<sup>13</sup>C NMR** (100 MHz, CDCl<sub>3</sub>): δ 173.3, 172.1, 172.1, 166.4, 163.22, 160.7, 139.4, 139.4, 138.9, 137.5, 137.1, 132.0, 129.8, 129.7, 129.6, 129.0, 128.9, 128.7, 128.3, 128.1, 124.4, 124.4, 118.7, 118.5, 115.9, 115.6, 61.7, 52.2.

**<sup>19</sup>F NMR** (376 MHz, CDCl<sub>3</sub>): δ – 112.0.

**HRMS** (ESI, m/z): calcd. For C<sub>25</sub>H<sub>21</sub>FNO<sub>4</sub> [M+H]<sup>+</sup>: 418.1449, found: 418.1451;

**HPLC analysis:** 91% ee, [CHIRALPAK ODH column; 0.5 mL/min; solvent system: *i*-PrOH/hexane = 10:90; retention times: 15.1 min (minor), 20.7 min (major)].

### Methyl (*R*)-2-((*N*-benzoyl-3-chlorobenzamido)(phenyl)methyl)acrylate (**3e**)

Product **3e** was obtained 38.1 mg in 88% yield as white solid. mp: 124-125°C. [α]<sub>D</sub><sup>25</sup> = + 101.9 (*c* = 1.0 in CHCl<sub>3</sub>)

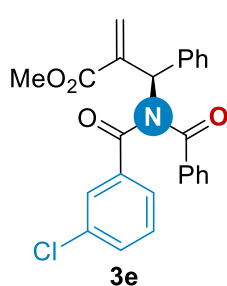

**<sup>1</sup>H NMR** (400 MHz, CDCl<sub>3</sub>): δ 7.57 (d, *J* = 7.3 Hz, 2H), 7.38 – 7.29 (m, 6H), 7.25-7.20 (m, 2H), 7.14-7.10 (m, 3H), 7.01 (t, *J* = 7.9 Hz, 1H), 6.89 (s, 1H), 6.54 (d, *J* = 1.2 Hz, 1H), 5.67 (d, *J* = 1.7 Hz, 1H), 3.72 (s, 3H).

**<sup>13</sup>C NMR** (100 MHz, CDCl<sub>3</sub>): δ 173.3, 172.0, 166.4, 138.9, 138.9, 137.5, 137.1, 134.1, 132.0, 131.5, 129.6, 129.4, 129.0, 128.8, 128.8, 128.7, 128.3, 128.2, 126.7, 61.7, 52.2.

**HRMS** (ESI, m/z): calcd. For C<sub>25</sub>H<sub>21</sub>ClNO<sub>4</sub> [M+H]<sup>+</sup>: 434.1154, found: 434.1155;

**HPLC analysis:** 91% ee, [CHIRALPAK ODH column; 0.5 mL/min; solvent system: *i*-PrOH/hexane = 10:90; retention times: 14.0 min (minor), 29.6 min (major)].

### Methyl (*R*)-2-((*N*-benzoyl-4-methylbenzamido)(phenyl)methyl)acrylate (**3f**)

Product **3f** was obtained 35.1 mg in 85 % yield as colorless oil. [α]<sub>D</sub><sup>25</sup> = + 72.1 (*c* = 1.0 in CHCl<sub>3</sub>)

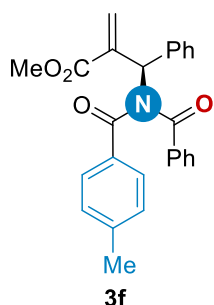

**<sup>1</sup>H NMR** (400 MHz, CDCl<sub>3</sub>): δ 7.59-7.54 (m, 2H), 7.39-7.23 (m, 7H), 7.18-7.14 (m, 1H), 7.09-7.04 (m, 2H), 6.94-6.86 (m, 3H),



6.53-6.51 (m, 1H), 5.71 (d,  $J = 1.4$  Hz, 1H), 3.69 (s, 3H), 2.15 (s, 3H).

**$^{13}\text{C}$  NMR** (100 MHz,  $\text{CDCl}_3$ ):  $\delta$  173.5, 173.4, 166.5, 142.5, 139.3, 137.8, 137.4, 134.6, 131.6, 129.4, 129.1, 129.0, 128.8, 128.8, 128.6, 128.1, 128.0, 61.5, 52.1, 21.4.

**HRMS** (ESI,  $m/z$ ): calcd. For  $\text{C}_{26}\text{H}_{24}\text{NO}_4$   $[\text{M}+\text{H}]^+$ : 414.1700, found: 414.1702;

**HPLC analysis**: 93% ee, [CHIRALPAK ODH column; 0.5 mL/min; solvent system: *i*-PrOH/hexane = 5:95; retention times: 23.8 min (minor), 37.4 min (major)].

### Methyl (*R*)-2-((*N*-benzoyl-4-methoxybenzamido)(phenyl)methyl)acrylate (**3g**)

Product **3g** was obtained 37.8 mg in 88 % yield as colorless oil.  $[\alpha]_{\text{D}}^{25} = +43.8$  ( $c = 1.0$  in  $\text{CHCl}_3$ )

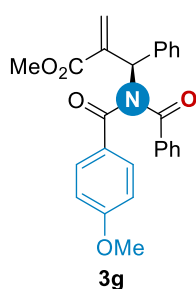

**$^1\text{H}$  NMR** (400 MHz,  $\text{CDCl}_3$ ):  $\delta$  7.58-7.55 (m, 2H), 7.41-7.33 (m, 6H), 7.29-7.25 (m, 1H), 7.22-7.17 (m, 1H), 7.13-7.09 (m, 2H), 6.92-6.91 (m, 1H), 6.60-6.57 (m, 2H), 6.53 (d,  $J = 0.8$  Hz, 1H), 5.70 (d,  $J = 1.4$  Hz, 1H), 3.71 (s, 3H), 3.70 (s, 3H).

**$^{13}\text{C}$  NMR** (100 MHz,  $\text{CDCl}_3$ ):  $\delta$  173.2, 173.0, 166.5, 162.4, 139.3,

137.7, 137.4, 131.5, 131.3, 129.7, 129.3, 129.1, 128.6, 128.6, 128.1, 127.9, 113.4, 61.5, 55.3, 52.1.

**HRMS** (ESI,  $m/z$ ): calcd. For  $\text{C}_{26}\text{H}_{24}\text{NO}_5$   $[\text{M}+\text{H}]^+$ : 430.1649, found: 430.1652;

**HPLC analysis**: 99% ee, [CHIRALPAK ODH column; 0.5 mL/min; solvent system: *i*-PrOH/hexane = 10:90; retention times: 31.6 min (minor), 54.0 min (major)].

### Methyl (*R*)-2-((*N*-benzoyl-4-fluorobenzamido)(phenyl)methyl)acrylate (**3h**)

Product **3h** was obtained 37.5 mg in 90 % yield as colorless oil.  $[\alpha]_{\text{D}}^{25} = +98.6$  ( $c = 1.0$  in  $\text{CHCl}_3$ )

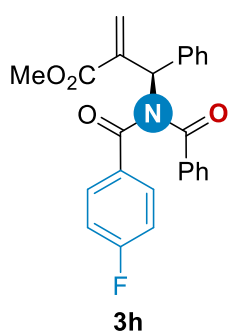

**$^1\text{H}$  NMR** (400 MHz,  $\text{CDCl}_3$ ):  $\delta$  7.59-7.55 (m, 2H), 7.42-7.34 (m, 6H), 7.31-7.28 (m, 1H), 7.23-7.18 (m, 1H), 7.12-7.07 (m, 2H), 6.91-6.90 (m, 1H), 6.80-6.74 (m, 2H), 6.53 (d,  $J = 1.1$  Hz, 1H), 5.68 (d,  $J = 1.6$  Hz, 1H), 3.71 (s, 3H).

**<sup>13</sup>C NMR** (100 MHz, CDCl<sub>3</sub>): δ 173.3, 172.4, 166.4, 165.6, 163.1, 139.0, 137.6, 137.2, 133.7, 133.6, 131.8, 131.4, 131.3, 131.2, 129.5, 129.0, 128.7, 128.7, 128.2, 128.1, 115.6, 115.4, 115.2, 61.7, 52.1.

**<sup>19</sup>F NMR** (376 MHz, CDCl<sub>3</sub>): δ – 106.2.

**HRMS** (ESI, m/z): calcd. For C<sub>25</sub>H<sub>21</sub>FNO<sub>4</sub> [M+H]<sup>+</sup>: 418.1449, found: 418.1451;

**HPLC analysis:** 95% ee, [CHIRALPAK ODH column; 0.5 mL/min; solvent system: *i*-PrOH/hexane = 5:95; retention times: 24.0 min (minor), 34.8 min (major)].

### Methyl (*R*)-2-((*N*-benzoyl-4-chlorobenzamido)(phenyl)methyl)acrylate (**3i**)

Product **3i** was obtained 39.5 mg in 91% yield as colorless oil. [α]<sub>D</sub><sup>25</sup> = + 88.0 (*c* = 1.0 in CHCl<sub>3</sub>)

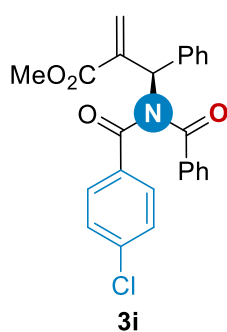

**<sup>1</sup>H NMR** (400 MHz, CDCl<sub>3</sub>): δ 7.58-7.55 (m, 2H), 7.38-7.27 (m, 7H), 7.25-7.20 (m, 1H), 7.14-7.05 (m, 4H), 6.88 (s, 1H), 6.53 (d, *J* = 1.0 Hz, 1H), 5.67 (d, *J* = 1.6 Hz, 1H), 3.72 (s, 3H).

**<sup>13</sup>C NMR** (100 MHz, CDCl<sub>3</sub>): δ 173.3, 172.5, 166.4, 139.0, 137.9, 137.5, 137.2, 135.8, 132.0, 130.2, 129.6, 129.0, 128.8, 128.7, 128.4, 128.3, 128.1, 61.7, 52.2.

**HRMS** (ESI, m/z): calcd. For C<sub>25</sub>H<sub>21</sub>ClNO<sub>4</sub> [M+H]<sup>+</sup>: 434.1154, found: 434.1157;

**HPLC analysis:** 94% ee, [CHIRALPAK ODH column; 0.5 mL/min; solvent system: *i*-PrOH/hexane = 10:90; retention times: 16.1 min (minor), 21.1 min (major)].

### Methyl (*R*)-2-((*N*-benzoyl-4-(trifluoromethyl)benzamido)(phenyl)methyl)acrylate (**3j**)

Product **3j** was obtained 31.8 mg in 68 % yield as colorless oil. [α]<sub>D</sub><sup>25</sup> = +103.6 (*c* = 1.0 in CHCl<sub>3</sub>)

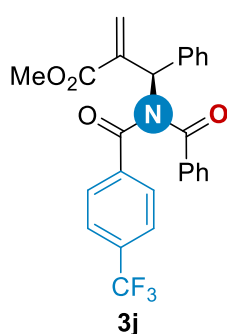

**<sup>1</sup>H NMR** (400 MHz, CDCl<sub>3</sub>): δ 7.59-7.56 (m, 2H), 7.45 (d, *J* = 8.2 Hz, 2H), 7.40-7.31 (m, 7H), 7.25-7.20 (m, 1H), 7.12-7.09 (m,

2H), 6.87 (t,  $J = 1.9$  Hz, 1H), 6.55 (d,  $J = 1.4$  Hz, 1H), 5.66 (d,  $J = 1.8$  Hz, 1H), 3.74 (s, 3H).

**$^{13}\text{C}$  NMR** (100 MHz,  $\text{CDCl}_3$ ):  $\delta$  173.4, 172.3, 166.4, 140.6, 138.8, 137.4, 137.1, 132.9, 132.6, 132.1, 129.7, 129.0, 128.9, 128.9, 128.8, 128.3, 128.2, 125.2, 125.1, 125.0, 125.0, 124.6, 121.9, 61.8, 52.2.

**$^{19}\text{F}$  NMR** (376 MHz,  $\text{CDCl}_3$ ):  $\delta - 63.4$ .

**HRMS** (ESI,  $m/z$ ): calcd. For  $\text{C}_{26}\text{H}_{21}\text{F}_3\text{NO}_4$   $[\text{M}+\text{H}]^+$ : 468.1417, found: 468.1420;

**HPLC analysis**: 93% ee, [CHIRALPAK ODH column; 0.5 mL/min; solvent system: *i*-PrOH/hexane = 10:90; retention times: 13.4 min (minor), 16.2 min (major)].

### Methyl (*R*)-2-((*N*-(2-methylbenzoyl)benzamido)(phenyl)methyl)acrylate (**3k**)

Product **3k** was obtained 33.9 mg in 82% yield as colorless oil.  $[\alpha]_{\text{D}}^{25} = + 88.2$  ( $c = 1.0$  in  $\text{CHCl}_3$ )

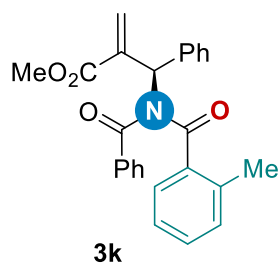

**$^1\text{H}$  NMR** (400 MHz,  $\text{CDCl}_3$ ):  $\delta$  7.61 (d,  $J = 7.4$  Hz, 2H), 7.39-7.35 (m, 2H), 7.31-7.27 (m, 3H), 7.20-7.15 (m, 2H), 7.11-7.07 (m, 2H), 7.03-6.94 (m, 2H), 6.89 (t,  $J = 1.8$  Hz, 1H), 6.77 (d,  $J = 7.3$  Hz, 1H), 6.53 (d,  $J = 1.0$  Hz, 1H), 5.70 (s, 1H), 3.73 (s, 3H), 2.19 (s, 3H).

**$^{13}\text{C}$  NMR** (100 MHz,  $\text{CDCl}_3$ ):  $\delta$  174.1, 172.6, 166.5, 139.1, 138.2, 138.0, 137.7, 136.6, 131.4, 131.0, 130.8, 129.3, 128.7, 128.1, 128.0, 127.9, 127.9, 125.2, 61.2, 52.2, 19.8.

**HRMS** (ESI,  $m/z$ ): calcd. For  $\text{C}_{26}\text{H}_{24}\text{NO}_4$   $[\text{M}+\text{H}]^+$ : 414.1700, found: 414.1700;

**HPLC analysis**: 89% ee, [CHIRALPAK ODH column; 0.5 mL/min; solvent system: *i*-PrOH/hexane = 5:95; retention times: 19.7 min (minor), 23.3 min (major)].

### Methyl (*R*)-2-((*N*-(2-bromobenzoyl)benzamido)(phenyl)methyl)acrylate (**3l**)

Product **3l** was obtained 40.5 mg in 85 % yield as colorless oil.  $[\alpha]_{\text{D}}^{25} = + 66.8$  ( $c = 1.0$  in  $\text{CHCl}_3$ )

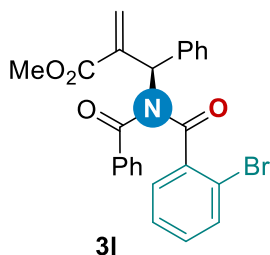

**<sup>1</sup>H NMR** (400 MHz, CDCl<sub>3</sub>): δ 7.60 (d, *J* = 7.4 Hz, 2H), 7.41-7.35 (m, 4H), 7.34-7.28 (m, 1H), 7.26-7.13 (m, 5H), 7.10 (td, *J* = 7.6, 1.1 Hz, 1H), 6.95 (td, *J* = 7.8, 1.7 Hz, 1H), 6.89 (s, 1H), 6.55 (d, *J* = 1.1 Hz, 1H), 5.74 (s, 1H), 3.74 (s, 3H).

**<sup>13</sup>C NMR** (100 MHz, CDCl<sub>3</sub>): δ 173.8, 169.5, 166.5, 138.7, 137.7, 137.3, 137.2, 133.8, 131.8, 131.4, 129.3, 129.2, 128.7, 128.4, 128.2, 128.1, 126.7, 121.8, 61.3, 52.2.

**HRMS** (ESI, *m/z*): calcd. For C<sub>25</sub>H<sub>21</sub>BrNO<sub>4</sub> [M+H]<sup>+</sup>: 478.0648, found: 478.0649;

**HPLC analysis:** 92% ee, [CHIRALPAK ODH column; 0.5 mL/min; solvent system: *i*-PrOH/hexane = 5:95; retention times: 28.8 min (minor), 32.8 min (major)].

### Methyl (*R*)-2-((*N*-(3-methylbenzoyl)benzamido)(phenyl)methyl)acrylate (**3m**)

Product **3m** was obtained 31.4 mg in 76 % yield as colorless oil. [α]<sub>D</sub><sup>25</sup> = + 71.5 (*c* = 1.0 in CHCl<sub>3</sub>)

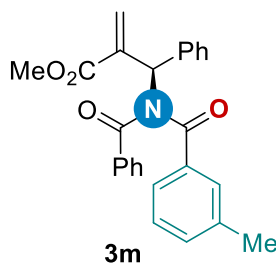

**<sup>1</sup>H NMR** (400 MHz, CDCl<sub>3</sub>): δ 7.63-7.54 (m, 2H), 7.37-7.33 (m, 4H), 7.29-7.25 (m, 1H), 7.19-7.14 (m, 3H), 7.09-7.05 (m, 2H), 6.97-6.93 (m, 3H), 6.53 (d, *J* = 0.9 Hz, 1H), 5.71 (d, *J* = 1.4 Hz, 1H), 3.71 (s, 3H), 2.14 (s, 3H).

**<sup>13</sup>C NMR** (100 MHz, CDCl<sub>3</sub>): δ 173.6, 173.6, 166.5, 139.2, 137.8, 137.7, 137.4, 137.2, 132.4, 131.5, 129.5, 129.3, 129.1, 128.7, 128.6, 128.1, 128.0, 128.0, 126.0, 61.5, 52.1, 21.0.

**HRMS** (ESI, *m/z*): calcd. For C<sub>26</sub>H<sub>24</sub>NO<sub>4</sub> [M+H]<sup>+</sup>: 414.1700, found: 414.1699;

**HPLC analysis:** 93% ee, [CHIRALPAK ODH column; 0.5 mL/min; solvent system: *i*-PrOH/hexane = 5:95; retention times: 19.1 min (minor), 43.9 min (major)].

### Methyl (*R*)-2-((*N*-(4-methylbenzoyl)benzamido)(phenyl)methyl)acrylate (**3n**)

Product **3n** was obtained 30.6 mg in 74 % yield as colorless oil. [α]<sub>D</sub><sup>25</sup> = + 61.0 (*c* = 1.0 in CHCl<sub>3</sub>)

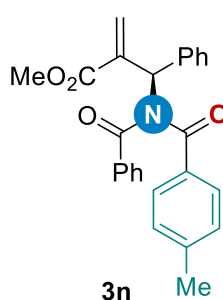

**<sup>1</sup>H NMR** (400 MHz, CDCl<sub>3</sub>): δ 7.60-7.54 (m, 2H), 7.39-7.24 (m, 7H), 7.19-7.15 (m, 1H), 7.10-7.05 (m, 2H), 6.94-6.87 (m, 3H), 6.54-6.52 (m, 1H), 5.71 (d, *J* = 1.4 Hz, 1H), 3.70 (s, 3H), 2.16 (s, 3H).

**<sup>13</sup>C NMR** (100 MHz, CDCl<sub>3</sub>): δ 173.5, 173.4, 166.5, 142.5, 139.2, 137.7, 137.4, 134.5, 131.6, 129.4, 129.1, 129.0, 128.9, 128.8, 128.6, 128.1, 128.0, 61.5, 52.1, 21.3.

**HRMS** (ESI, *m/z*): calcd. For C<sub>26</sub>H<sub>24</sub>NO<sub>4</sub> [M+H]<sup>+</sup>: 414.1700, found: 414.1701;

**HPLC analysis:** 91% ee, [CHIRALPAK ODH column; 0.5 mL/min; solvent system: *i*-PrOH/hexane = 5:95; retention times: 23.5 min (minor), 37.9 min (major)].

### Methyl (*R*)-2-((*N*-benzoyl-1-naphthamido)(phenyl)methyl)acrylate (**3o**)

Product **3o** was obtained 41.8 mg in 93% yield as white solid. mp: 66 - 67°C. [ $\alpha$ ]<sub>D</sub><sup>25</sup> = + 87.0 (*c* = 1.0 in CHCl<sub>3</sub>)

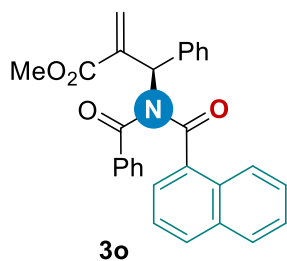

**<sup>1</sup>H NMR** (400 MHz, CDCl<sub>3</sub>): δ 8.18 (d, *J* = 8.5 Hz, 1H), 7.69 (d, *J* = 7.4 Hz, 2H), 7.58 (dd, *J* = 14.6, 8.2 Hz, 2H), 7.49-7.28 (m, 6H), 7.23-7.13 (m, 3H), 7.04 (s, 1H), 6.81-6.67 (m, 3H), 6.57 (d, *J* = 0.9 Hz, 1H), 5.76 (s, 1H), 3.77 (s, 3H).

**<sup>13</sup>C NMR** (100 MHz, CDCl<sub>3</sub>): δ 174.2, 172.0, 166.6, 139.2, 137.7, 137.1, 135.1, 133.1, 131.9, 130.5, 130.1, 129.4, 129.3, 128.7, 128.1, 127.9, 127.9, 127.6, 127.1, 127.0, 126.4, 125.4, 123.9, 61.1, 52.2.

**HRMS** (ESI, *m/z*): calcd. For C<sub>29</sub>H<sub>24</sub>NO<sub>4</sub> [M+H]<sup>+</sup>: 450.1700, found: 450.1702;

**HPLC analysis:** 92% ee, [CHIRALPAK ODH column; 0.5 mL/min; solvent system: *i*-PrOH/hexane = 5:95; retention times: 34.23 min (minor), 50.8 min (major)].

### Methyl (*R*)-2-((*N*-benzoylbenzamido)(*o*-tolyl)methyl)acrylate (**4a**)

Product **4a** was obtained 33.1 mg in 80% yield as colorless oil. [ $\alpha$ ]<sub>D</sub><sup>25</sup> = + 182.8 (*c* = 1.0 in CHCl<sub>3</sub>)

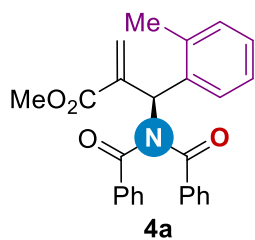

**<sup>1</sup>H NMR** (400 MHz, CDCl<sub>3</sub>): δ 7.77 (d, *J* = 7.4 Hz, 1H), 7.42-7.40 (m, 4H), 7.27-7.14 (m, 5H), 7.11-7.04 (m, 5H), 6.48 (d, *J* = 0.5 Hz, 1H), 5.52 (d, *J* = 1.2 Hz, 1H), 3.70 (s, 3H), 2.42 (s, 3H).

**<sup>13</sup>C NMR** (100 MHz, CDCl<sub>3</sub>): δ 173.6, 166.4, 138.2, 137.4, 136.4, 136.3, 131.6, 130.5, 129.6, 129.0, 128.9, 128.1, 128.0, 126.4, 58.6, 52.1, 19.2.

**HRMS** (ESI, *m/z*): calcd. For C<sub>26</sub>H<sub>24</sub>NO<sub>4</sub> [M+H]<sup>+</sup>: 414.1700, found: 414.1703;

**HPLC analysis**: 87 % ee, [CHIRALPAK ODH column; 0.5 mL/min; solvent system: *i*-PrOH/hexane = 10:90; retention times: 13.2 min (minor), 23.1 min (major)].

#### Methyl (*R*)-2-((*N*-benzoylbenzamido)(2-methoxyphenyl)methyl)acrylate (**4b**)

Product **4b** was obtained 39.1 mg in 91 % yield as white solid. mp: 65 - 66°C. [ $\alpha$ ]<sub>D</sub><sup>25</sup> = + 6.1 (*c* = 1.0 in CHCl<sub>3</sub>)

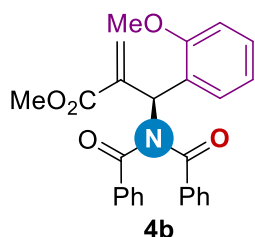

**<sup>1</sup>H NMR** (400 MHz, CDCl<sub>3</sub>): δ 7.59 (dd, *J* = 7.6, 1.5 Hz, 1H), 7.44-7.42 (m, 4H), 7.28-7.17 (m, 4H), 7.12-7.08 (m, 4H), 6.98 (td, *J* = 7.5, 0.9 Hz, 1H), 6.84 (d, *J* = 8.2 Hz, 1H), 6.54 (s, 1H), 5.84 (d, *J* = 1.0 Hz, 1H), 3.77 (s, 3H), 3.72 (s, 3H).

**<sup>13</sup>C NMR** (100 MHz, CDCl<sub>3</sub>): δ 173.4, 166.4, 156.7, 138.5, 137.4, 131.5, 130.5, 129.3, 128.9, 128.4, 128.0, 125.7, 120.6, 110.5, 56.3, 55.3, 52.1.

**HRMS** (ESI, *m/z*): calcd. For C<sub>26</sub>H<sub>24</sub>NO<sub>5</sub> [M+H]<sup>+</sup>: 430.1649, found: 430.1650;

**HPLC analysis**: 94% ee, [CHIRALPAK ODH column; 0.5 mL/min; solvent system: *i*-PrOH/hexane = 20:80; retention times: 13.1 min (minor), 34.4 min (major)].

#### Methyl (*S*)-2-((*N*-benzoylbenzamido)(2-chlorophenyl)methyl)acrylate (**4c**)

Product **4c** was obtained 27.8 mg in 64 % yield as colorless oil. [ $\alpha$ ]<sub>D</sub><sup>25</sup> = + 65.5 (*c* = 1.0 in CHCl<sub>3</sub>)

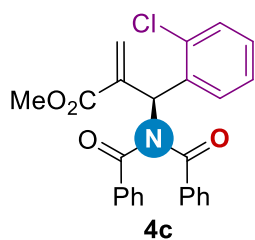

**<sup>1</sup>H NMR** (400 MHz, CDCl<sub>3</sub>): δ 7.81 (dd, *J* = 7.8, 1.5 Hz, 1H), 7.50-7.15 (m, 10H), 7.12-7.08 (m, 4H), 6.60 (s, 1H), 5.79 (d, *J* = 1.3 Hz, 1H), 3.70 (s, 3H).

**<sup>13</sup>C NMR** (100 MHz, CDCl<sub>3</sub>): δ 173.1, 166.0, 137.4, 137.0, 135.3, 133.8, 131.8, 131.2, 129.7, 129.7, 129.4, 129.0, 128.1, 126.9, 58.5, 52.2.

**HRMS** (ESI, *m/z*): calcd. For C<sub>25</sub>H<sub>21</sub>ClNO<sub>4</sub> [M+H]<sup>+</sup>: 434.1154, found: 434.1154;

**HPLC analysis**: 82% ee, [CHIRALPAK ODH column; 0.5 mL/min; solvent system: *i*-PrOH/hexane = 20:80; retention times: 12.6 min (minor), 23.3 min (major)].

#### Methyl (S)-2-((N-benzoylbenzamido)(2-bromophenyl)methyl)acrylate (4d)

Product **4d** was obtained 43.0 mg in 90% yield as white solid. mp: 126-127°C, [α]<sub>D</sub><sup>25</sup> = + 122.4 (*c* = 1.0 in CHCl<sub>3</sub>)

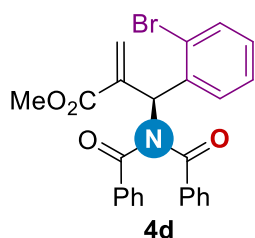

**<sup>1</sup>H NMR** (400 MHz, CDCl<sub>3</sub>): δ 7.85 (dd, *J* = 7.8, 1.5 Hz, 1H), 7.55 (dd, *J* = 8.0, 1.0 Hz, 1H), 7.48-7.45 (m, 4H), 7.37-7.33 (m, 2H), 7.21-7.08 (m, 7H), 6.59 (s, 1H), 5.71 (d, *J* = 1.4 Hz, 1H), 3.69 (s, 3H).

**<sup>13</sup>C NMR** (100 MHz, CDCl<sub>3</sub>): δ 173.1, 166.0, 137.4, 137.2, 137.0, 133.1, 131.8, 131.2, 130.0, 129.6, 129.0, 128.1, 127.6, 124.3, 61.2, 52.2.

**HRMS** (ESI, *m/z*): calcd. For C<sub>25</sub>H<sub>21</sub>BrNO<sub>4</sub> [M+H]<sup>+</sup>: 478.0648, found: 478.0647;

**HPLC analysis**: 91% ee, [CHIRALPAK ODH column; 0.5 mL/min; solvent system: *i*-PrOH/hexane = 15:85; retention times: 14.8 min (minor), 32.8 min (major)].

#### Methyl (R)-2-((N-benzoylbenzamido)(*m*-tolyl)methyl)acrylate (4e)

Product **4e** was obtained 33.9 mg in 82% yield as colorless oil. [α]<sub>D</sub><sup>25</sup> = + 78.9 (*c* = 1.0 in CHCl<sub>3</sub>)

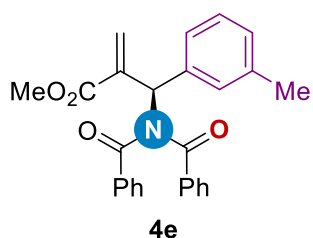

**<sup>1</sup>H NMR** (400 MHz, CDCl<sub>3</sub>): δ 7.44-7.33 (m, 6H), 7.23 (d, *J* = 7.6 Hz, 1H), 7.19-7.15 (m, 2H), 7.10-7.08 (m, 5H), 6.89

(t,  $J = 1.7$  Hz, 1H), 6.53 (s, 1H), 5.71 (s, 1H), 3.72 (s, 3H), 2.33 (s, 3H).

**$^{13}\text{C}$  NMR** (100 MHz,  $\text{CDCl}_3$ ):  $\delta$  173.5, 166.5, 139.2, 138.2, 137.6, 137.4, 131.6, 129.8, 129.4, 128.9, 128.8, 128.5, 128.1, 126.1, 61.6, 52.1, 21.5.

**HRMS** (ESI,  $m/z$ ): calcd. For  $\text{C}_{26}\text{H}_{24}\text{NO}_4$   $[\text{M}+\text{H}]^+$ : 414.1700, found: 414.1704;

**HPLC analysis**: 77% ee, [CHIRALPAK ODH column; 0.5 mL/min; solvent system: *i*-PrOH/hexane = 10:90; retention times: 14.1 min (minor), 25.9 min (major)].

### Methyl (*R*)-2-((*N*-benzoylbenzamido)(3-methoxyphenyl)methyl)acrylate (**4f**)

Product **4f** was obtained 39.5 mg in 92% yield as colorless oil.  $[\alpha]_{\text{D}}^{25} = +81.8$  ( $c = 1.0$  in  $\text{CHCl}_3$ )

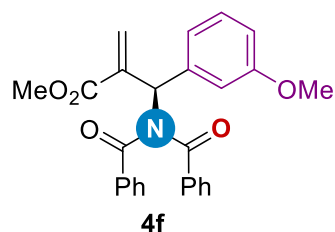

**$^1\text{H}$  NMR** (400 MHz,  $\text{CDCl}_3$ ):  $\delta$  7.39-7.36 (m, 4H), 7.29-7.25 (m, 1H), 7.19-7.13 (m, 8H), 6.91 (s, 1H), 6.85-6.79 (m, 1H), 6.54 (d,  $J = 0.8$  Hz, 1H), 5.74 (d,  $J = 1.4$  Hz, 1H), 3.75 (s, 3H), 3.71 (s, 3H).

**$^{13}\text{C}$  NMR** (100 MHz,  $\text{CDCl}_3$ ):  $\delta$  173.5, 166.5, 159.7, 139.2, 139.0, 137.3, 131.7, 129.6, 129.6, 128.9, 128.1, 121.4, 114.6, 113.6, 61.5, 55.2, 52.1.

**HRMS** (ESI,  $m/z$ ): calcd. For  $\text{C}_{26}\text{H}_{24}\text{NO}_5$   $[\text{M}+\text{H}]^+$ : 430.1649, found: 430.1648;

**HPLC analysis**: 89% ee, [CHIRALPAK ODH column; 0.5 mL/min; solvent system: *i*-PrOH/hexane = 10:90; retention times: 19.5 min (minor), 32.2 min (major)].

### Methyl (*R*)-2-((*N*-benzoylbenzamido)(3-bromophenyl)methyl)acrylate (**4g**)

Product **4g** was obtained 35.8 mg in 75 % yield as colorless oil.  $[\alpha]_{\text{D}}^{25} = +66.2$  ( $c = 1.0$  in  $\text{CHCl}_3$ )

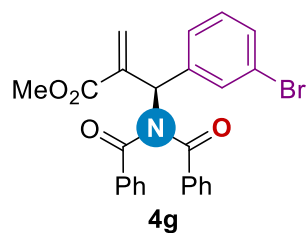

**$^1\text{H}$  NMR** (400 MHz,  $\text{CDCl}_3$ ):  $\delta$  7.76 (t,  $J = 1.7$  Hz, 1H), 7.55 (d,  $J = 7.7$  Hz, 1H), 7.44-7.42 (m, 1H), 7.38-7.35 (m, 4H), 7.24-7.17 (m, 3H), 7.12-7.08 (m, 4H), 6.93 (s, 1H), 6.58 (d,  $J = 1.2$  Hz, 1H), 5.75 (d,  $J = 1.7$  Hz, 1H), 3.72 (s,

3H).



**<sup>13</sup>C NMR** (100 MHz, CDCl<sub>3</sub>): δ 173.3, 166.2, 140.0, 138.3, 137.1, 132.2, 131.8, 131.2, 130.2, 130.1, 128.8, 128.2, 127.7, 122.7, 60.7, 52.2.

**HRMS** (ESI, m/z): calcd. For C<sub>25</sub>H<sub>21</sub>BrNO<sub>4</sub> [M+H]<sup>+</sup>: 478.0648, found: 478.0649;

**HPLC analysis:** 80% ee, [CHIRALPAK ODH column; 0.5 mL/min; solvent system: *i*-PrOH/hexane = 10:90; retention times: 15.6 min (minor), 21.6 min (major)].

#### Methyl (*R*)-2-((*N*-benzoylbenzamido)(*p*-tolyl)methyl)acrylate (**4h**)

Product **4h** was obtained 33.5 mg in 81% yield as white solid. mp: 175-176°C. [α]<sub>D</sub><sup>25</sup> = + 63.9 (*c* = 1.0 in CHCl<sub>3</sub>)

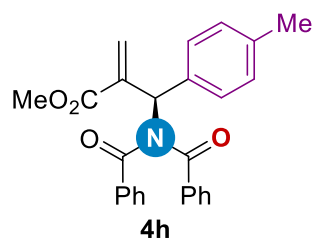

**<sup>1</sup>H NMR** (400 MHz, CDCl<sub>3</sub>): δ 7.46 (d, *J* = 8.1 Hz, 2H), 7.37-7.34 (m, 4H), 7.20-7.15 (m, 4H), 7.10-7.06 (m, 4H), 6.89 (s, 1H), 6.53 (d, *J* = 0.7 Hz, 1H), 5.74 (d, *J* = 1.4 Hz, 1H), 3.72 (s, 3H), 2.31 (s, 3H).

**<sup>13</sup>C NMR** (100 MHz, CDCl<sub>3</sub>): δ 173.5, 166.5, 139.3, 137.7, 137.4, 134.6, 131.6, 129.3, 129.1, 129.0, 128.8, 128.1, 61.4, 52.1, 21.1.

**HRMS** (ESI, m/z): calcd. For C<sub>26</sub>H<sub>24</sub>NO<sub>4</sub> [M+H]<sup>+</sup>: 414.1700, found: 414.1702;

**HPLC analysis:** 99% ee, [CHIRALPAK ODH column; 0.5 mL/min; solvent system: *i*-PrOH/hexane = 5:95; retention times: 27.8 min (minor), 30.5 min (major)].

#### Methyl (*R*)-2-((*N*-benzoylbenzamido)(4-isopropylphenyl)methyl)acrylate (**4i**)

Product **4i** was obtained 35.8 mg in 81% yield as colorless oil. [α]<sub>D</sub><sup>25</sup> = + 75.2 (*c* = 1.0 in CHCl<sub>3</sub>)

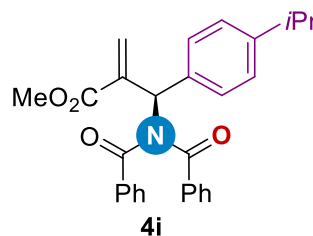

**<sup>1</sup>H NMR** (400 MHz, CDCl<sub>3</sub>): δ 7.51-7.47 (m, 2H), 7.38-7.35 (m, 4H), 7.22-7.14 (m, 5H), 7.09-7.05 (m, 4H), 6.90 (s, 1H), 6.52 (s, 1H), 5.70 (d, *J* = 1.3 Hz, 1H), 3.71 (s, 3H), 1.22 (s, 3H), 1.21 (s, 3H).

**<sup>13</sup>C NMR** (100 MHz, CDCl<sub>3</sub>): δ 173.5, 166.6, 148.5, 139.4, 137.5, 134.9, 131.6, 129.4, 129.0, 128.9, 128.1, 126.7, 61.4, 52.1, 33.7, 23.9, 23.8.

**HRMS** (ESI, m/z): calcd. For C<sub>28</sub>H<sub>28</sub>NO<sub>4</sub> [M+H]<sup>+</sup>: 442.2013, found: 442.2015;

**HPLC analysis:** 97% ee, [CHIRALPAK ODH column; 0.5 mL/min; solvent system: *i*-PrOH/hexane = 5:95; retention times: 21.5 min (minor), 28.9 min (major)].

**Methyl (R)-2-((N-benzoylbenzamido)(4-bromophenyl)methyl)acrylate (4j)**

Product **4j** was obtained 33.9 mg in 71% yield as white solid. mp: 170-171 °C [ $\alpha$ ]<sub>D</sub><sup>25</sup> = +40.2 (*c* = 1.0 in CHCl<sub>3</sub>)

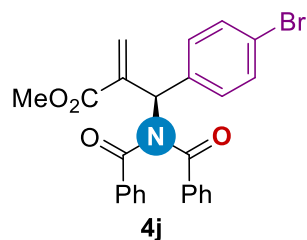

**<sup>1</sup>H NMR** (400 MHz, CDCl<sub>3</sub>):  $\delta$  7.49 (s, 4H), 7.37-7.34 (m, 4H), 7.21-7.16 (m, 2H), 7.11-7.07 (m, 4H), 6.92 (t, *J* = 1.6 Hz, 1H), 6.56 (d, *J* = 1.3 Hz, 1H), 5.75 (d, *J* = 1.7 Hz, 1H), 3.71 (s, 3H).

**<sup>13</sup>C NMR** (100 MHz, CDCl<sub>3</sub>):  $\delta$  173.3, 166.2, 138.6, 137.1, 136.7, 131.8, 131.8, 130.9, 129.6, 128.8, 128.2, 122.2, 60.8, 52.2.

**HRMS** (ESI, m/z): calcd. For C<sub>25</sub>H<sub>21</sub>BrNO<sub>4</sub> [M+H]<sup>+</sup>: 478.0648, found: 478.0644;

**HPLC analysis:** 93% ee, [CHIRALPAK ODH column; 0.5 mL/min; solvent system: *i*-PrOH/hexane = 5:95; retention times: 28.7 min (minor), 34.3 min (major)].

**Methyl (R)-2-((N-benzoylbenzamido)(4-nitrophenyl)methyl)acrylate (4k)**

Product **4k** was obtained 33.8 mg in 76 % yield as colorless oil. [ $\alpha$ ]<sub>D</sub><sup>25</sup> = + 22.0 (*c* = 1.0 in CHCl<sub>3</sub>)

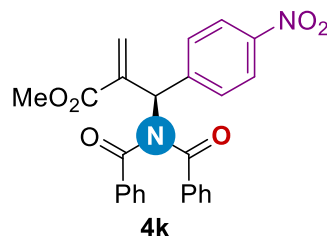

**<sup>1</sup>H NMR** (400 MHz, CDCl<sub>3</sub>):  $\delta$  8.26-8.21 (m, 2H), 7.81-7.77 (m, 2H), 7.39-7.36 (m, 4H), 7.24-7.19 (m, 2H), 7.13-7.10 (m, 5H), 6.65 (d, *J* = 1.2 Hz, 1H), 5.81 (d, *J* = 1.7 Hz, 1H), 3.73 (s, 3H).

**<sup>13</sup>C NMR** (100 MHz, CDCl<sub>3</sub>):  $\delta$  173.2, 165.9, 147.6, 145.0, 137.7, 136.7, 132.1, 130.4, 130.0, 128.8, 128.3, 123.8, 60.4, 52.4.

**HRMS** (ESI, m/z): calcd. For C<sub>25</sub>H<sub>21</sub>N<sub>2</sub>O<sub>6</sub> [M+H]<sup>+</sup>: 445.1394, found: 445.1394;

**HPLC analysis:** 99% ee, [CHIRALPAK ODH column; 0.5 mL/min; solvent system: *i*-PrOH/hexane = 5:95; retention times: 73.9 min (minor), 78.4 min (major)].

**Methyl (R)-2-((N-benzoylbenzamido)(4-(trifluoromethyl)phenyl)methyl)acrylate (4l)**

Product **4l** was obtained 36.0 mg in 77 % yield as colorless oil.  $[\alpha]_D^{25} = + 55.2$  ( $c = 1.0$  in  $\text{CHCl}_3$ )

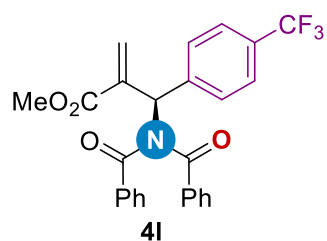

**<sup>1</sup>H NMR** (400 MHz,  $\text{CDCl}_3$ ):  $\delta$  7.74 (d,  $J = 8.3$  Hz, 2H), 7.64 (d,  $J = 8.2$  Hz, 2H), 7.39-7.36 (m, 4H), 7.22-7.18 (m, 2H), 7.12-7.05 (m, 5H), 6.60 (d,  $J = 1.2$  Hz, 1H), 5.74 (d,  $J = 1.7$  Hz, 1H), 3.72 (s, 3H).

**<sup>13</sup>C NMR** (100 MHz,  $\text{CDCl}_3$ ):  $\delta$  173.3, 166.2, 141.8, 138.3, 137.0, 131.9, 130.3, 130.1, 129.5, 128.8, 128.2, 125.6, 125.6, 60.8, 52.3.

**<sup>19</sup>F NMR** (376 MHz,  $\text{CDCl}_3$ ):  $\delta - 62.6$ .

**HRMS** (ESI,  $m/z$ ): calcd. For  $\text{C}_{26}\text{H}_{21}\text{F}_3\text{NO}_4$   $[\text{M}+\text{H}]^+$ : 468.1417, found: 468.1420;

**HPLC analysis:** 94% ee, [CHIRALPAK ODH column; 0.5 mL/min; solvent system: *i*-PrOH/hexane = 10:90; retention times: 16.5 min (minor), 22.7 min (major)].

**Methyl (R)-2-((N-benzoylbenzamido)(naphthalen-1-yl)methyl)acrylate e (4m)**

Product **4m** was obtained 31.9 mg in 71% yield as colorless oil.  $[\alpha]_D^{25} = + 61.8$  ( $c = 1.0$  in  $\text{CHCl}_3$ )

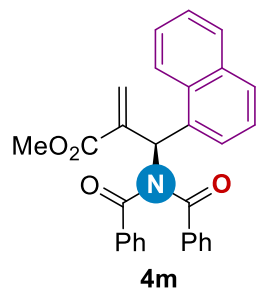

**<sup>1</sup>H NMR** (400 MHz,  $\text{CDCl}_3$ ):  $\delta$  8.35 (d,  $J = 8.6$  Hz, 1H), 7.97 (s, 1H), 7.88 (d,  $J = 7.1$  Hz, 1H), 7.81 (d,  $J = 8.1$  Hz, 1H), 7.76 (d,  $J = 8.2$  Hz, 1H), 7.63-7.58 (m, 1H), 7.49-7.44 (m, 2H), 7.39-7.36 (m, 4H), 7.15-7.10 (m, 2H), 7.05-7.01 (m, 4H), 6.65 (s, 1H), 6.00 (s, 1H), 3.68 (s, 3H).

**<sup>13</sup>C NMR** (100 MHz,  $\text{CDCl}_3$ ):  $\delta$  173.4, 166.4, 138.5, 137.2, 133.8, 132.7, 131.7, 131.2, 130.2, 129.0, 128.9, 128.1, 128.1, 126.7, 125.7, 125.1, 123.2, 57.7, 52.2.

**HRMS** (ESI, m/z): calcd. For C<sub>29</sub>H<sub>24</sub>NO<sub>4</sub> [M+H]<sup>+</sup>: 450.1700, found: 450.1702;

**HPLC analysis:** 76% ee, [CHIRALPAK ODH column; 0.5 mL/min; solvent system: *i*-PrOH/hexane = 20:80; retention times: 13.3 min (minor), 37.2 min (major)].

**Methyl (Z)-3-phenyl-2-(tosylmethyl)acrylate (6)**

Product **6** was obtained in 95 % yield as white solid. mp: 124-125°C.

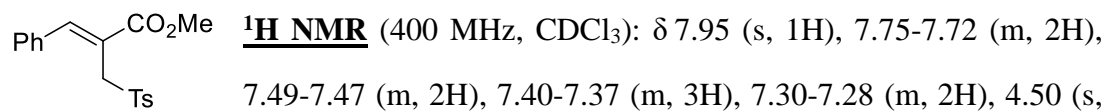

**<sup>13</sup>C NMR** (100 MHz, CDCl<sub>3</sub>): δ 166.9, 146.1, 144.7, 136.3, 133.7, 129.6, 129.6, 129.1, 128.7, 128.5, 121.1, 55.1, 52.3, 21.6.

**HRMS** (ESI, m/z): calcd. For C<sub>18</sub>H<sub>19</sub>O<sub>4</sub>S [M+H]<sup>+</sup>: 331.0999, found: 331.1000;

## 7. $^1\text{H}$ , $^{13}\text{C}$ NMR and HPLC data

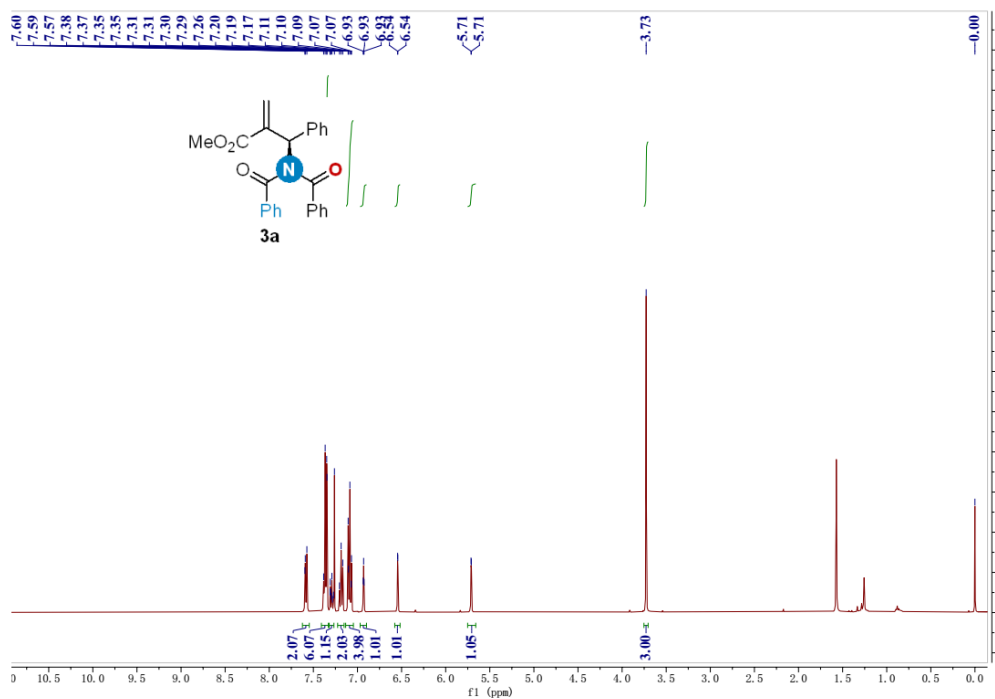

$^1\text{H}$  NMR spectrum of **3a** (400 MHz,  $\text{CDCl}_3$ )

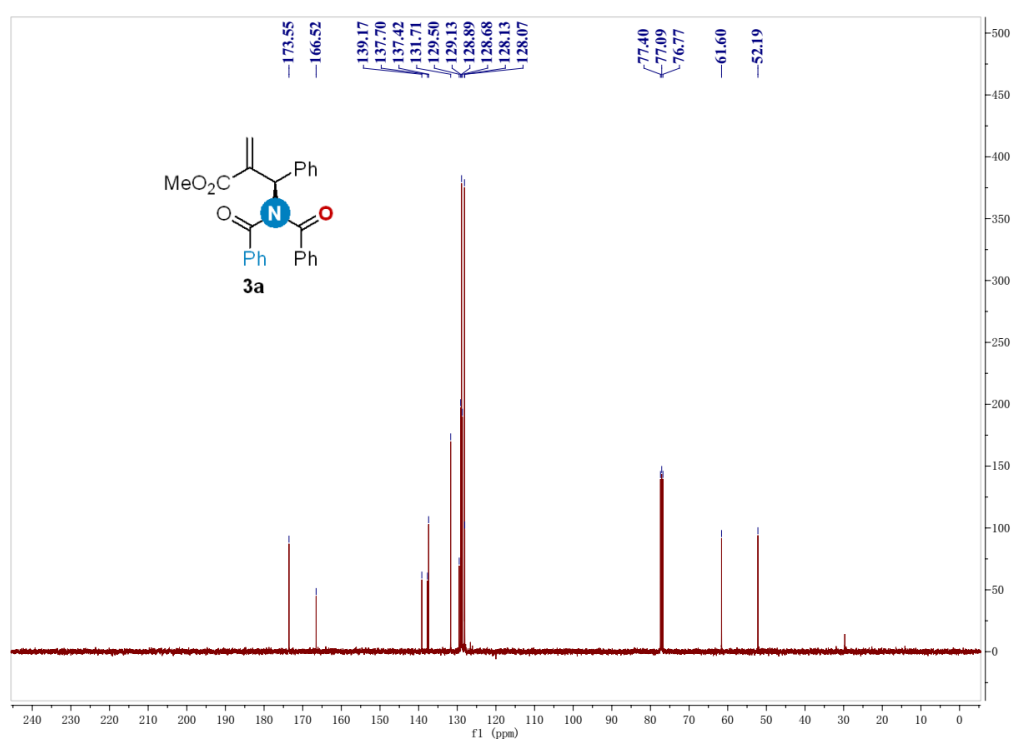

$^{13}\text{C}$  NMR spectrum of **3a** (100 MHz,  $\text{CDCl}_3$ )

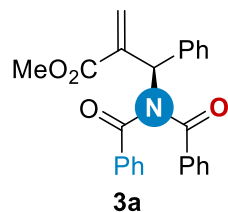

**<Chromatogram>**

mV

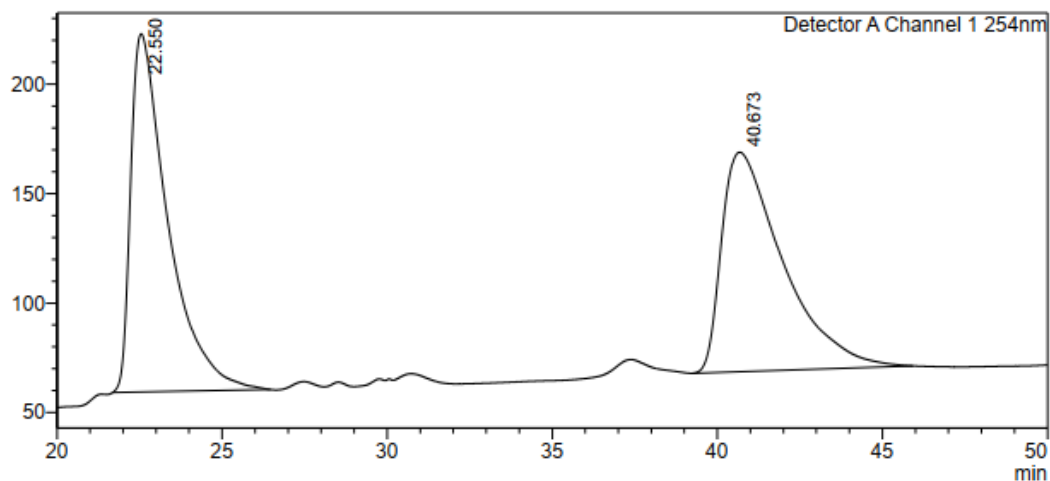

| Peak# | Ret. Time | Area     | Height | Area%   | Height% |
|-------|-----------|----------|--------|---------|---------|
| 1     | 22.550    | 12792380 | 163595 | 49.776  | 62.014  |
| 2     | 40.673    | 12907436 | 100206 | 50.224  | 37.986  |
| Total |           | 25699815 | 263801 | 100.000 | 100.000 |

**<Chromatogram>**

mV

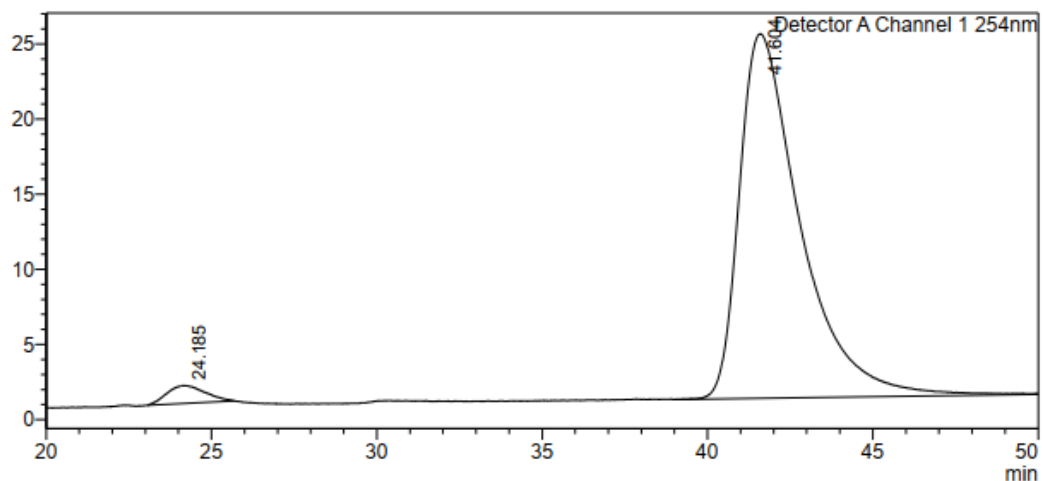

| Peak# | Ret. Time | Area    | Height | Area%   | Height% |
|-------|-----------|---------|--------|---------|---------|
| 1     | 24.185    | 94494   | 1179   | 2.951   | 4.637   |
| 2     | 41.604    | 3107990 | 24242  | 97.049  | 95.363  |
| Total |           | 3202484 | 25421  | 100.000 | 100.000 |

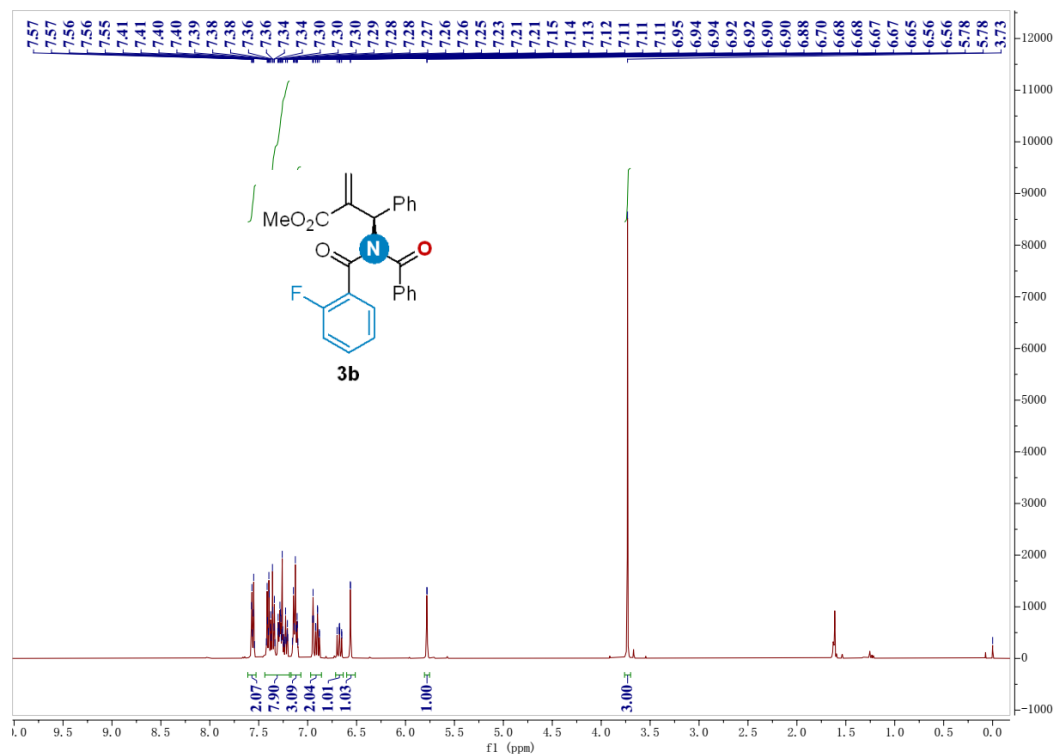

<sup>1</sup>H NMR spectrum of **3b** (400 MHz, CDCl<sub>3</sub>)

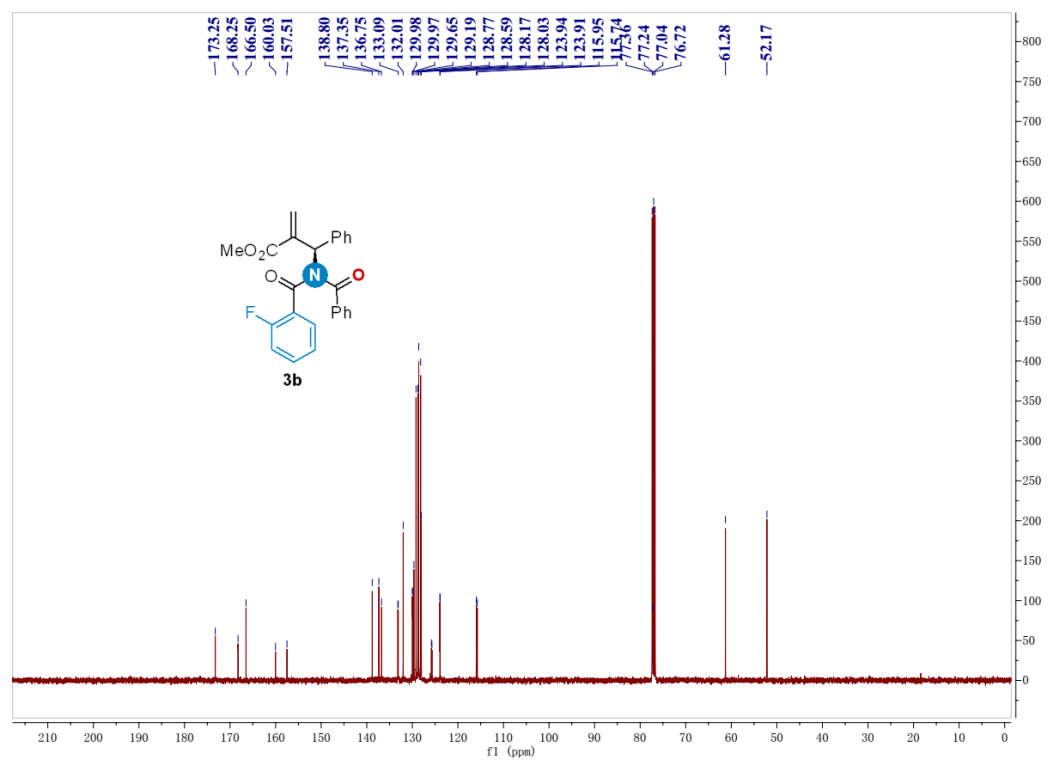

<sup>13</sup>C NMR spectrum of **3b** (100 MHz, CDCl<sub>3</sub>)

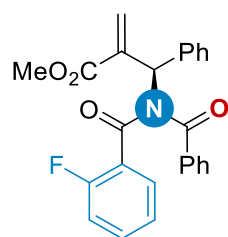

**3b**

<Chromatogram>

mV

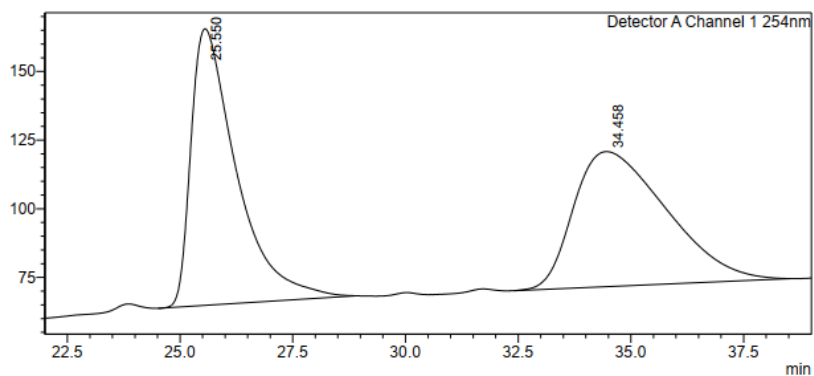

| Peak# | Ret. Time | Area     | Height | Area%   | Height% |
|-------|-----------|----------|--------|---------|---------|
| 1     | 25.550    | 7078578  | 100702 | 50.181  | 67.192  |
| 2     | 34.458    | 7027532  | 49170  | 49.819  | 32.808  |
| Total |           | 14106109 | 149872 | 100.000 | 100.000 |

<Chromatogram>

mV

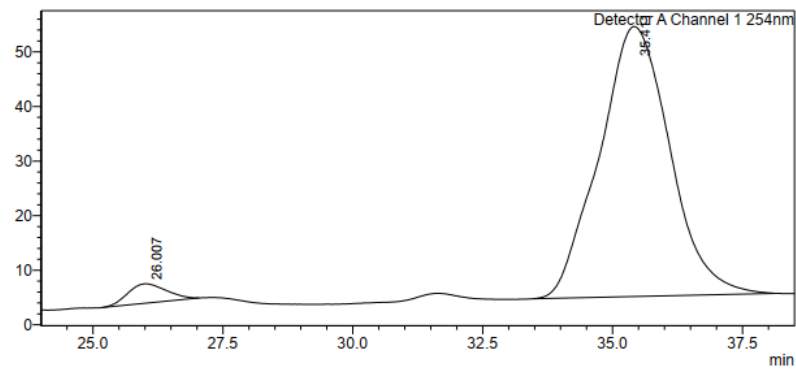

| Peak# | Ret. Time | Area    | Height | Area%   | Height% |
|-------|-----------|---------|--------|---------|---------|
| 1     | 26.007    | 183446  | 3565   | 3.780   | 6.724   |
| 2     | 35.411    | 4669165 | 49460  | 96.220  | 93.276  |
| Total |           | 4852611 | 53025  | 100.000 | 100.000 |



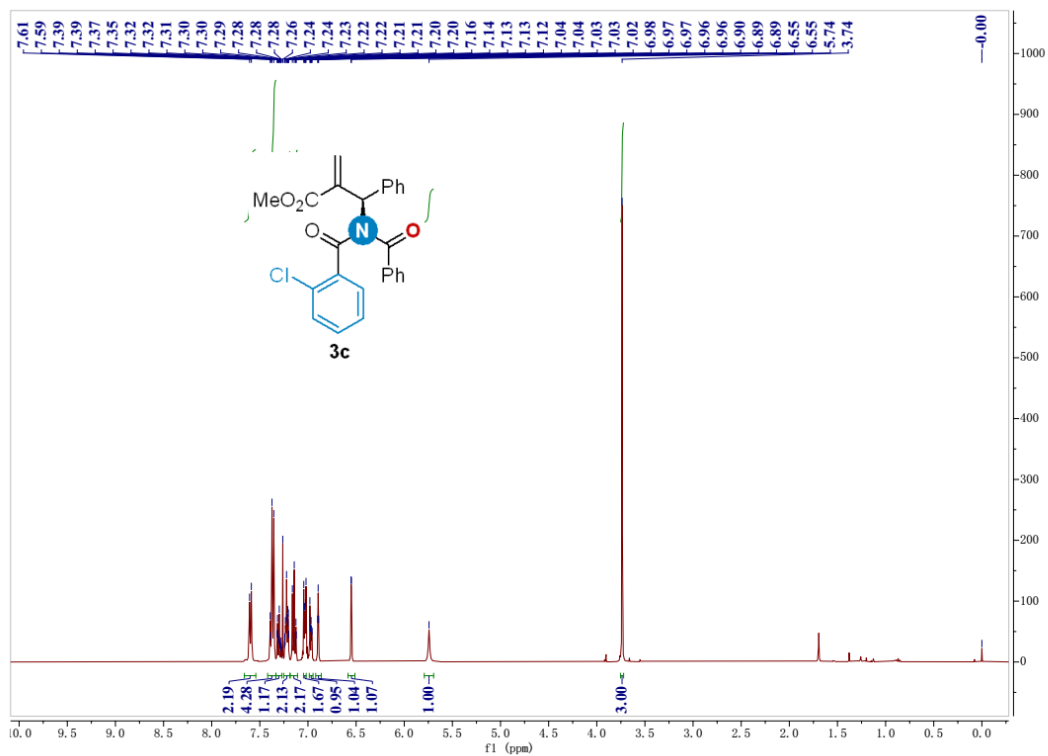

**<sup>1</sup>H NMR spectrum of 3c (400 MHz, CDCl<sub>3</sub>)**

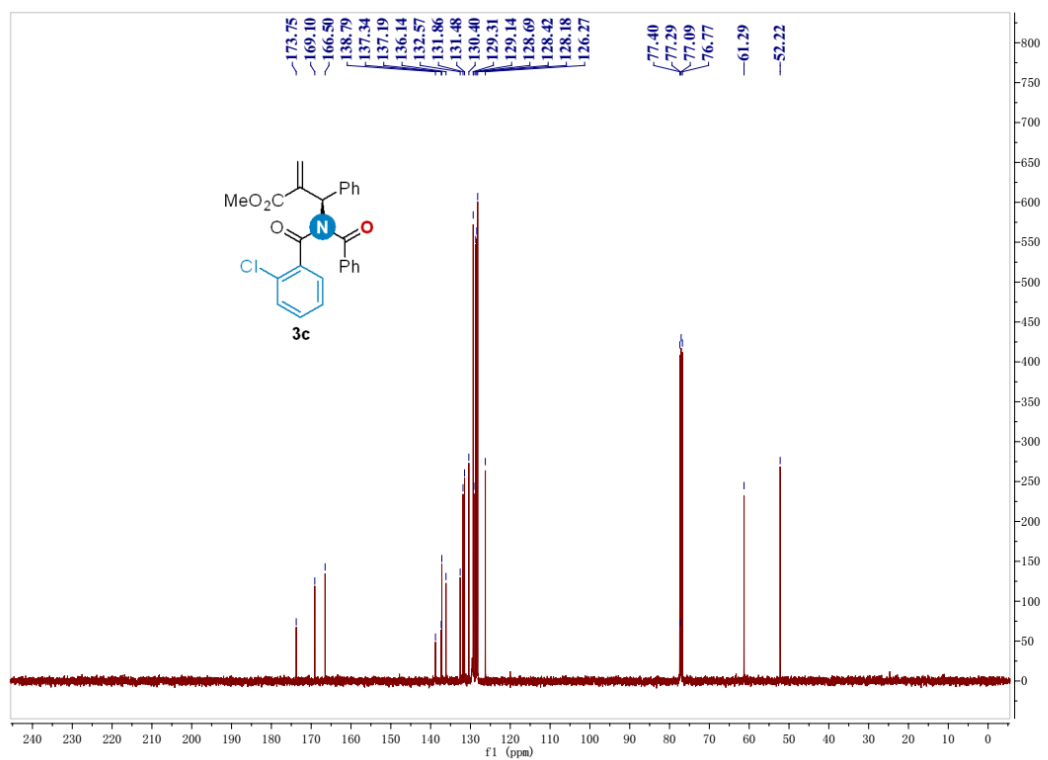

**<sup>13</sup>C NMR spectrum of 3c (100 MHz, CDCl<sub>3</sub>)**

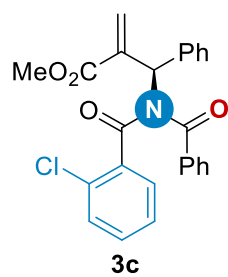

**<Chromatogram>**

mV

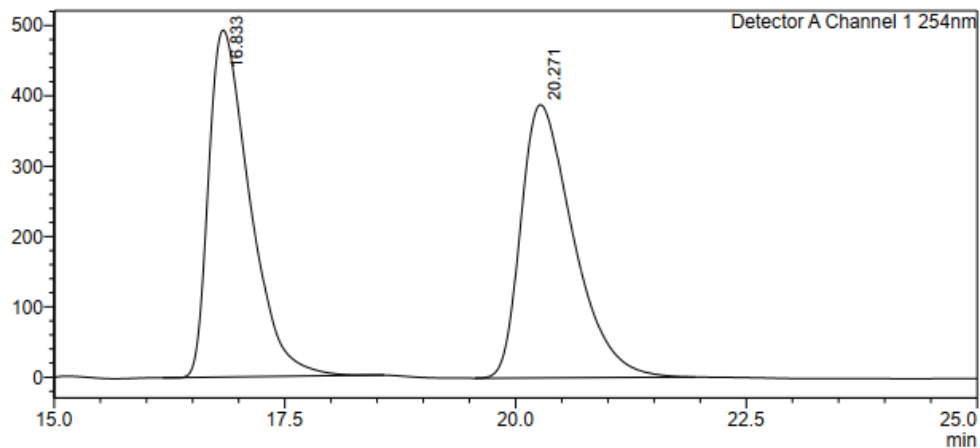

| Peak# | Ret. Time | Area     | Height | Area%   | Height% |
|-------|-----------|----------|--------|---------|---------|
| 1     | 16.833    | 15276082 | 493258 | 49.870  | 55.957  |
| 2     | 20.271    | 15355946 | 388230 | 50.130  | 44.043  |
| Total |           | 30632028 | 881487 | 100.000 | 100.000 |

**<Chromatogram>**

mV

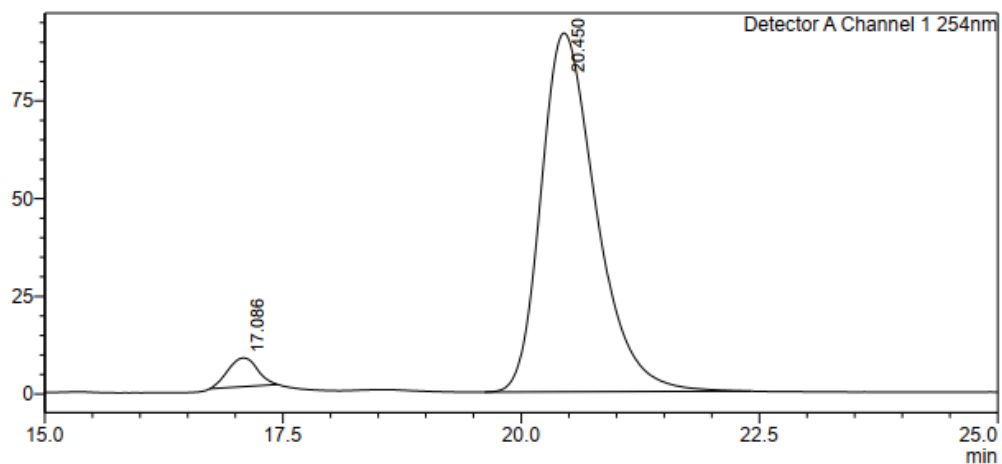

| Peak# | Ret. Time | Area    | Height | Area%   | Height% |
|-------|-----------|---------|--------|---------|---------|
| 1     | 17.086    | 158336  | 7316   | 4.112   | 7.387   |
| 2     | 20.450    | 3692356 | 91721  | 95.888  | 92.613  |
| Total |           | 3850693 | 99037  | 100.000 | 100.000 |

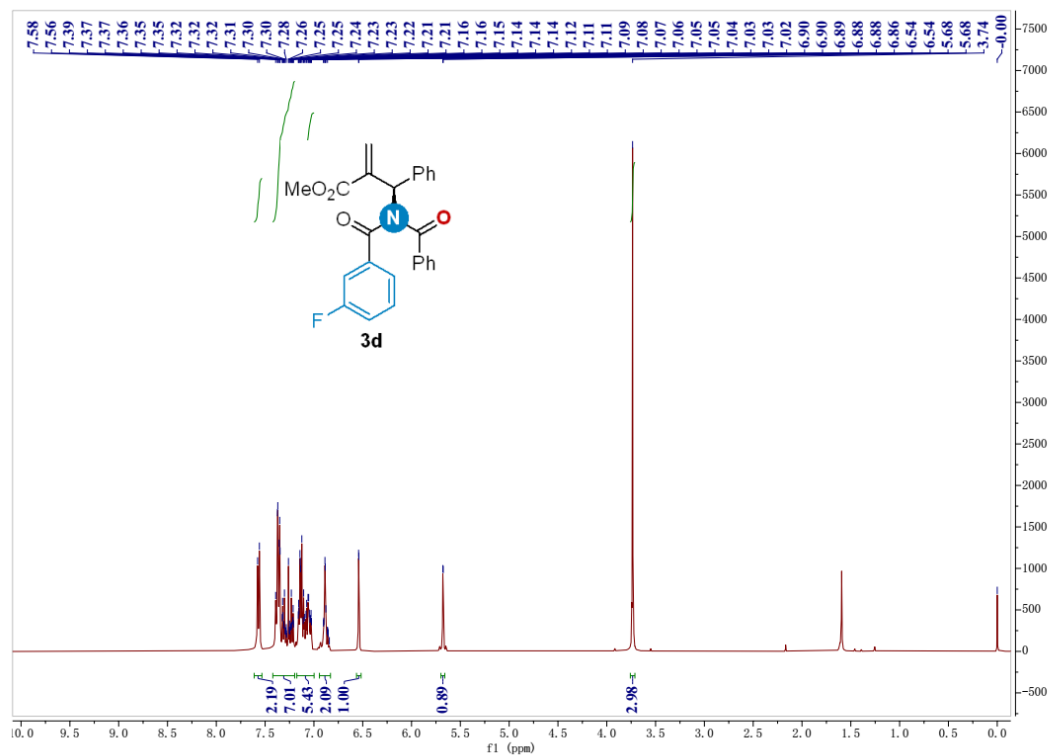

<sup>1</sup>H NMR spectrum of **3d** (400 MHz, CDCl<sub>3</sub>)

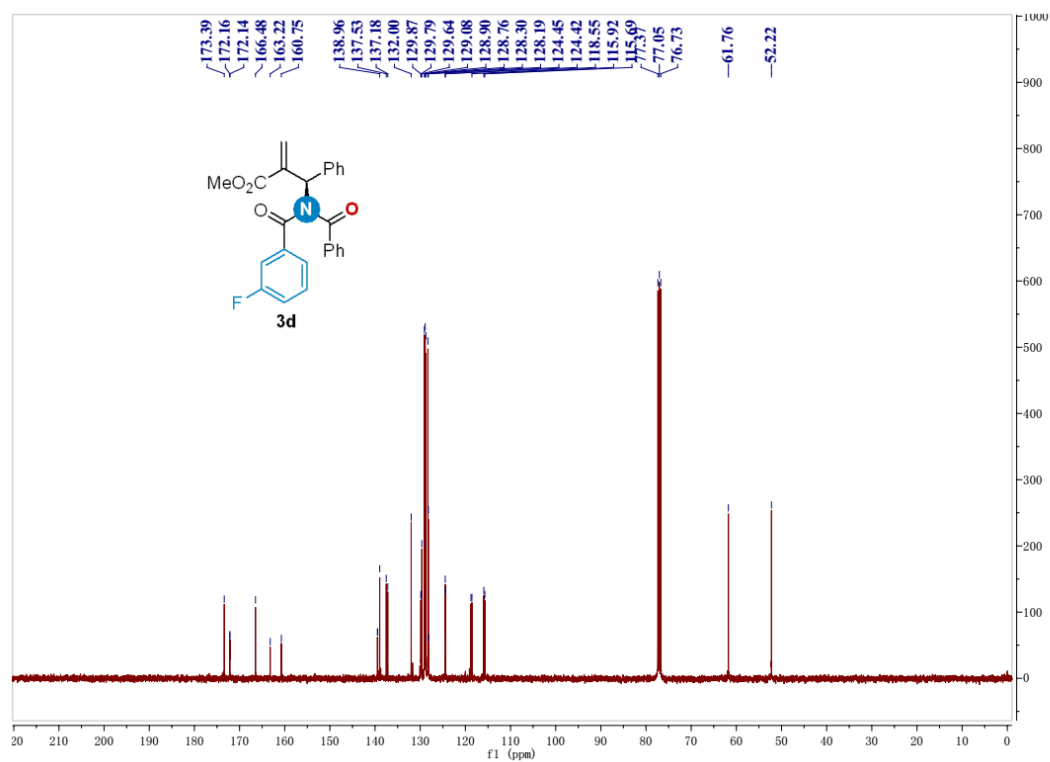

<sup>13</sup>C NMR spectrum of **3d** (100 MHz, CDCl<sub>3</sub>)

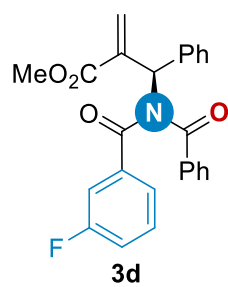

**<Chromatogram>**

mV

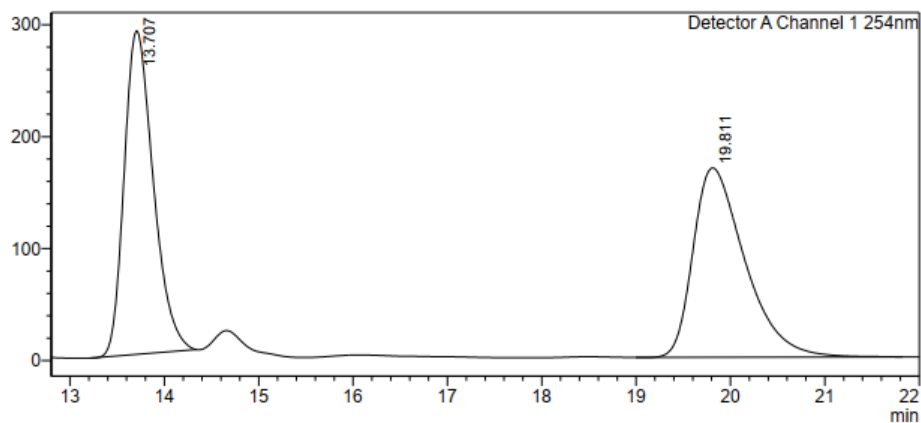

| Peak# | Ret. Time | Area     | Height | Area%   | Height% |
|-------|-----------|----------|--------|---------|---------|
| 1     | 13.707    | 6210828  | 289024 | 48.975  | 63.073  |
| 2     | 19.811    | 6470860  | 169214 | 51.025  | 36.927  |
| Total |           | 12681687 | 458239 | 100.000 | 100.000 |

**<Chromatogram>**

mV

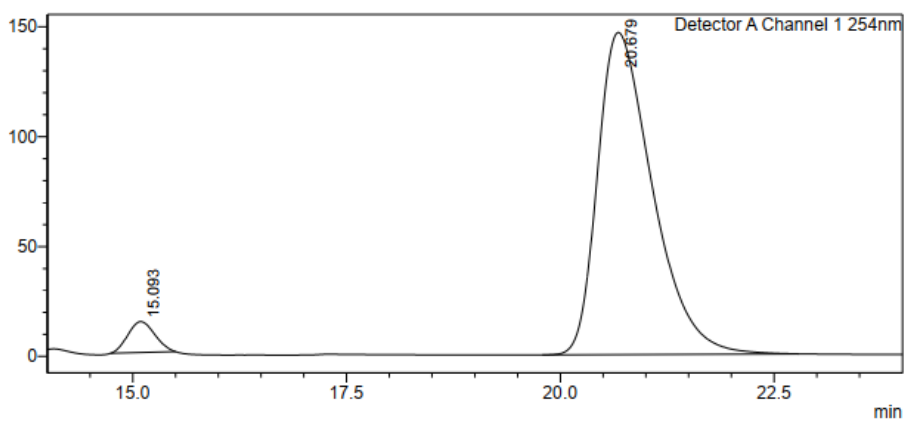

| Peak# | Ret. Time | Area    | Height | Area%   | Height% |
|-------|-----------|---------|--------|---------|---------|
| 1     | 15.093    | 309451  | 14094  | 4.510   | 8.774   |
| 2     | 20.679    | 6552019 | 146547 | 95.490  | 91.226  |
| Total |           | 6861469 | 160641 | 100.000 | 100.000 |

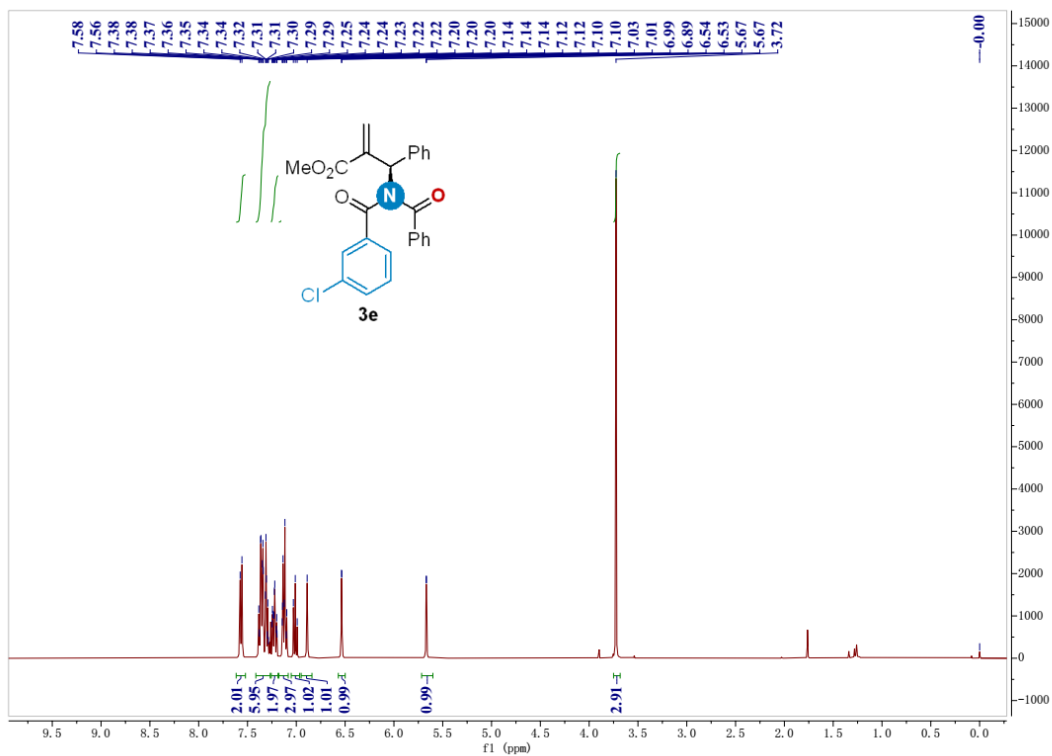

$^1\text{H}$  NMR spectrum of **3e** (400 MHz,  $\text{CDCl}_3$ )

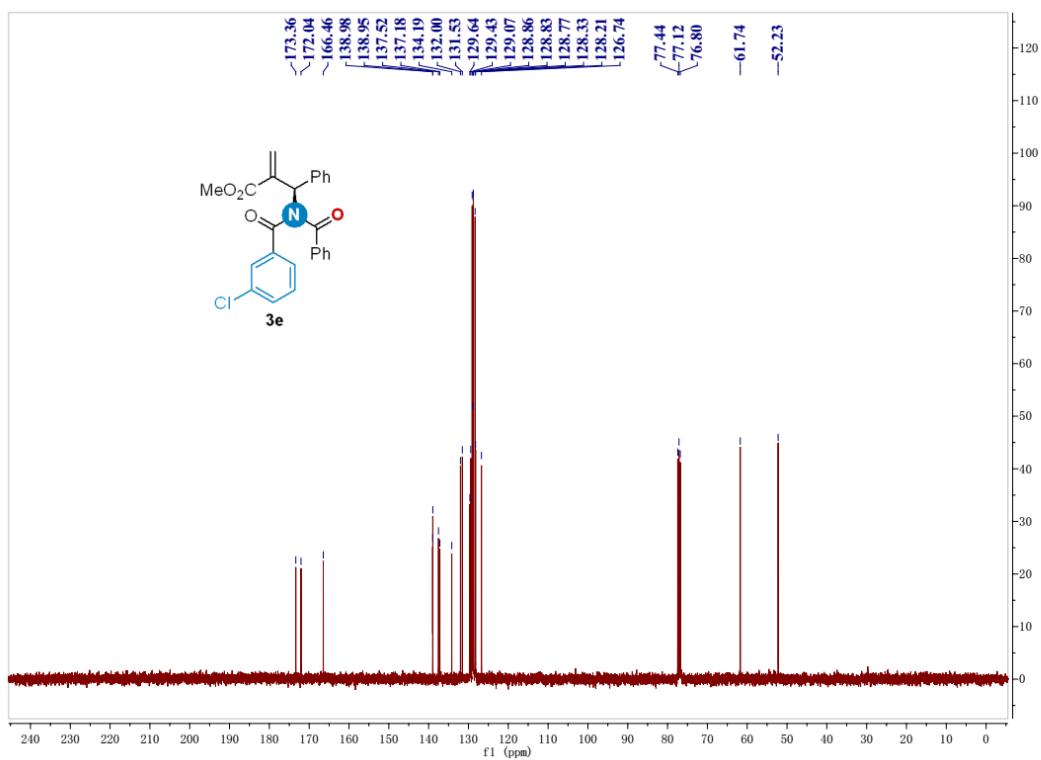

$^{13}\text{C}$  NMR spectrum of **3e** (100 MHz,  $\text{CDCl}_3$ )

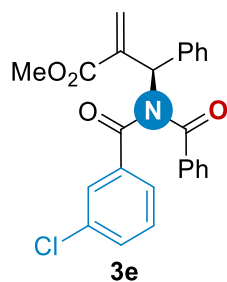

<Chromatogram>

mV

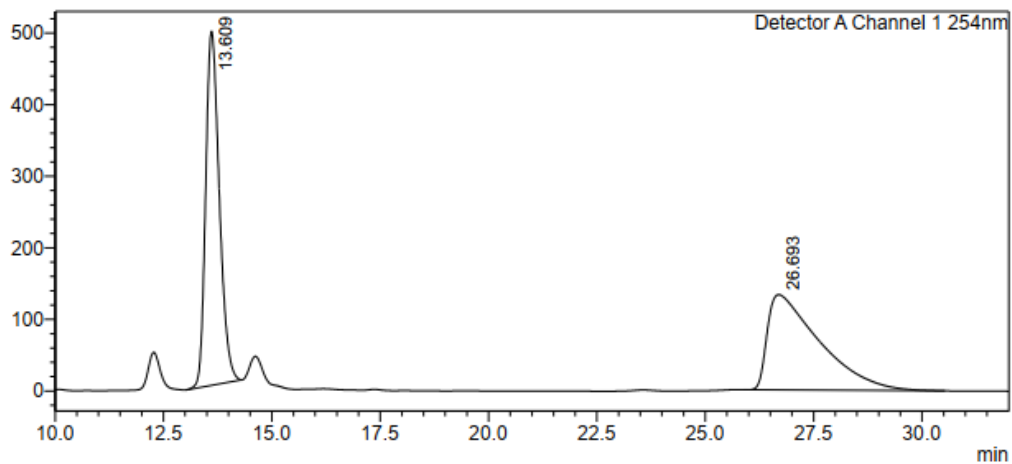

| Peak# | Ret. Time | Area     | Height | Area%   | Height% |
|-------|-----------|----------|--------|---------|---------|
| 1     | 13.609    | 10848949 | 494141 | 49.396  | 78.791  |
| 2     | 26.693    | 11114208 | 133009 | 50.604  | 21.209  |
| Total |           | 21963157 | 627150 | 100.000 | 100.000 |

<Chromatogram>

mV

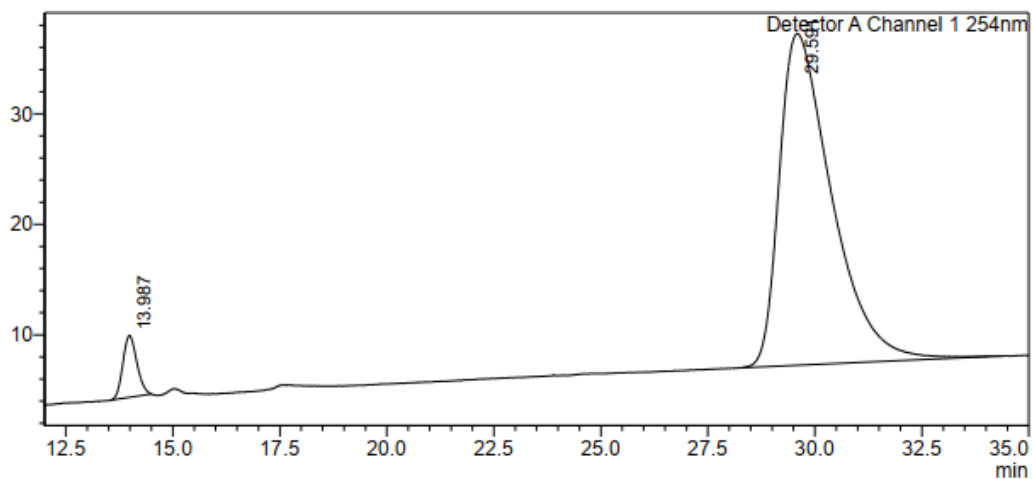

| Peak# | Ret. Time | Area    | Height | Area%   | Height% |
|-------|-----------|---------|--------|---------|---------|
| 1     | 13.987    | 127349  | 5585   | 4.747   | 15.687  |
| 2     | 29.591    | 2555204 | 30018  | 95.253  | 84.313  |
| Total |           | 2682554 | 35603  | 100.000 | 100.000 |

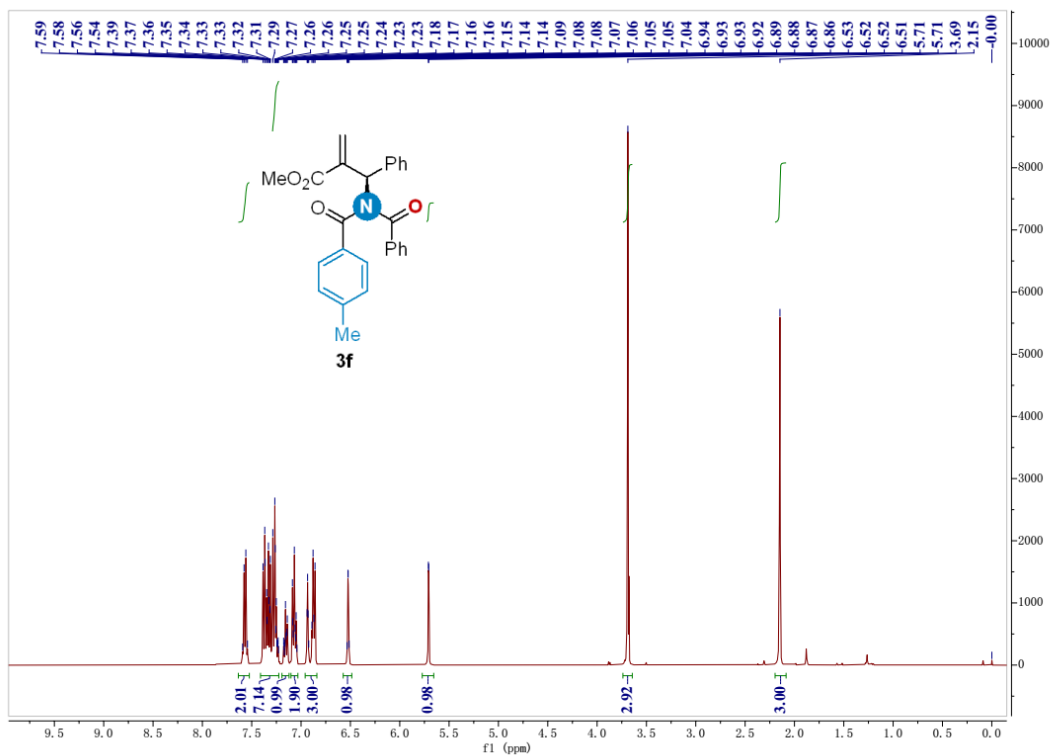

$^1\text{H}$  NMR spectrum of **3f** (400 MHz,  $\text{CDCl}_3$ )

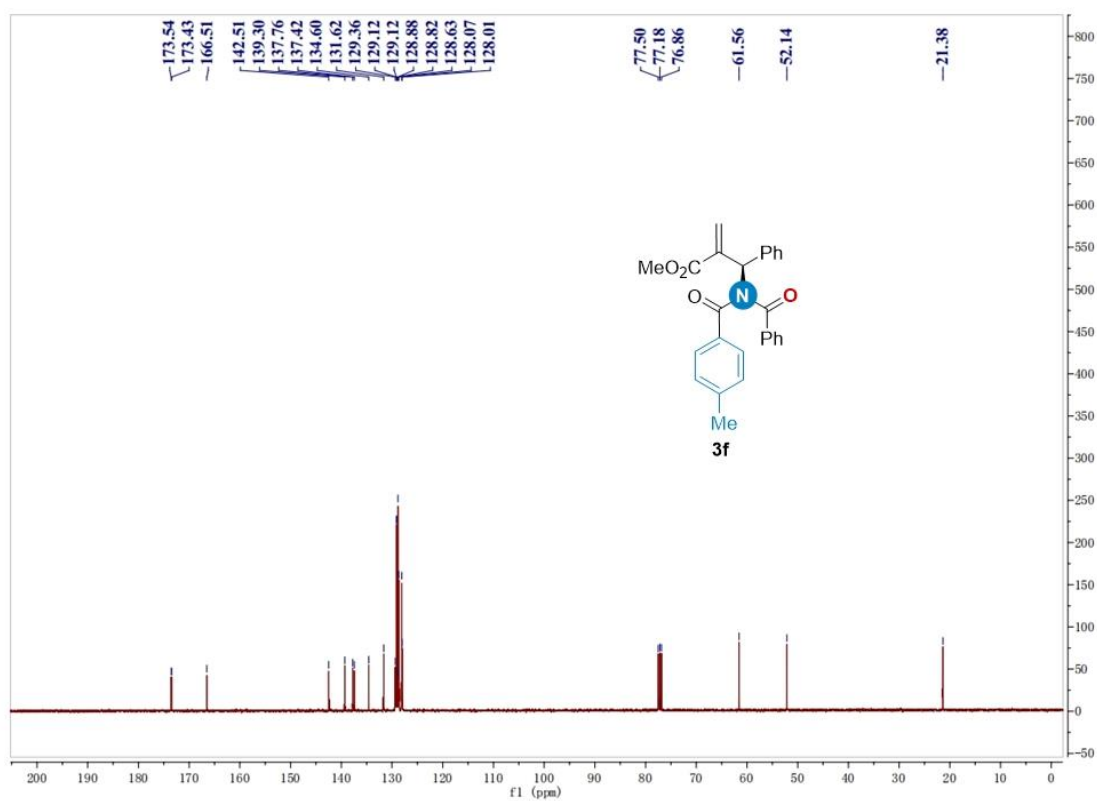

$^{13}\text{C}$  NMR spectrum of **3f** (100 MHz,  $\text{CDCl}_3$ )

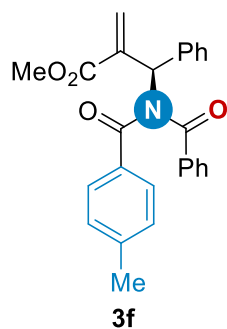

**<Chromatogram>**

mV

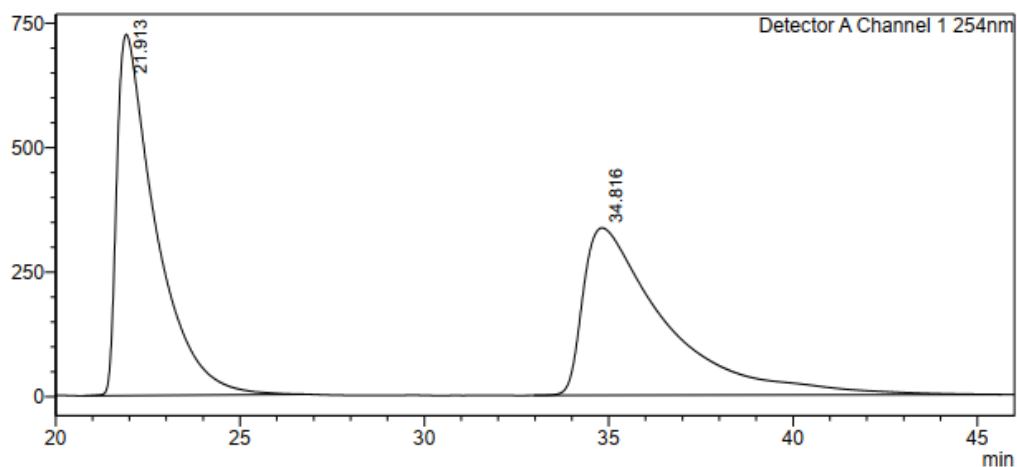

| Peak# | Ret. Time | Area      | Height  | Area%   | Height% |
|-------|-----------|-----------|---------|---------|---------|
| 1     | 21.913    | 53062547  | 724979  | 50.394  | 68.331  |
| 2     | 34.816    | 52232534  | 336008  | 49.606  | 31.669  |
| Total |           | 105295081 | 1060987 | 100.000 | 100.000 |

**<Chromatogram>**

mV

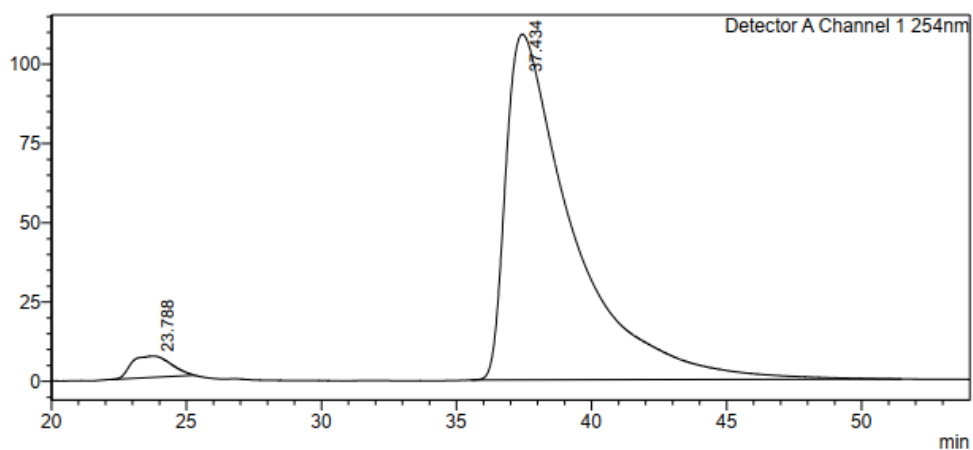

| Peak# | Ret. Time | Area     | Height | Area%   | Height% |
|-------|-----------|----------|--------|---------|---------|
| 1     | 23.788    | 676889   | 6695   | 3.475   | 5.787   |
| 2     | 37.434    | 18803711 | 109005 | 96.525  | 94.213  |
| Total |           | 19480600 | 115700 | 100.000 | 100.000 |



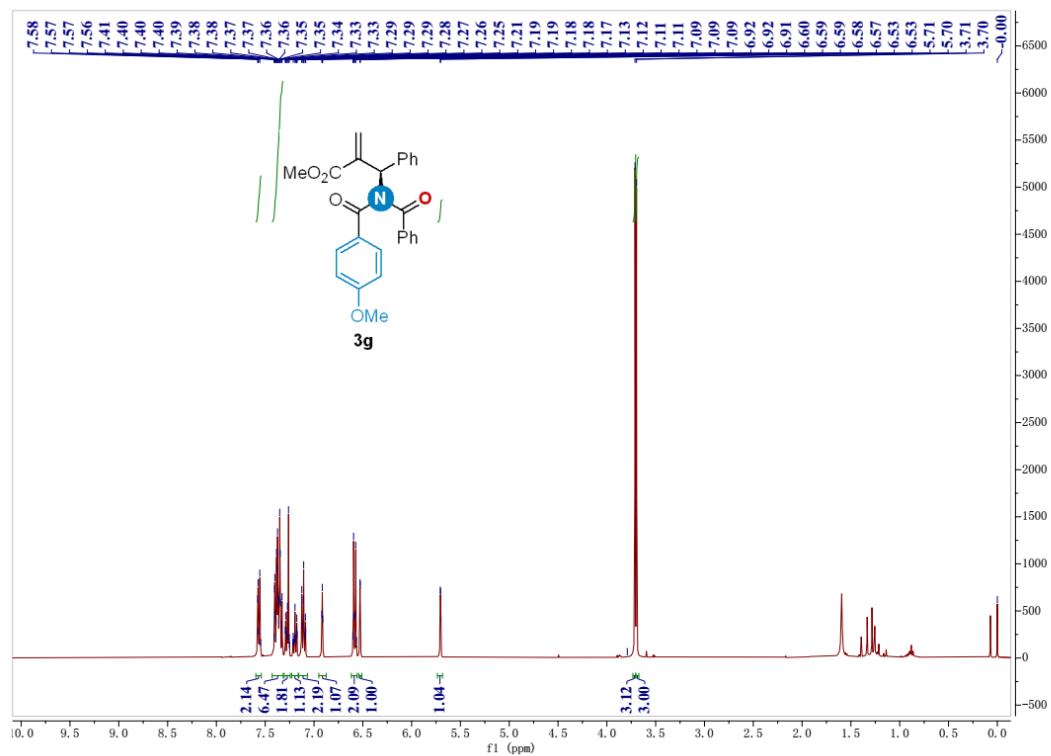

<sup>1</sup>H NMR spectrum of **3g** (400 MHz, CDCl<sub>3</sub>)

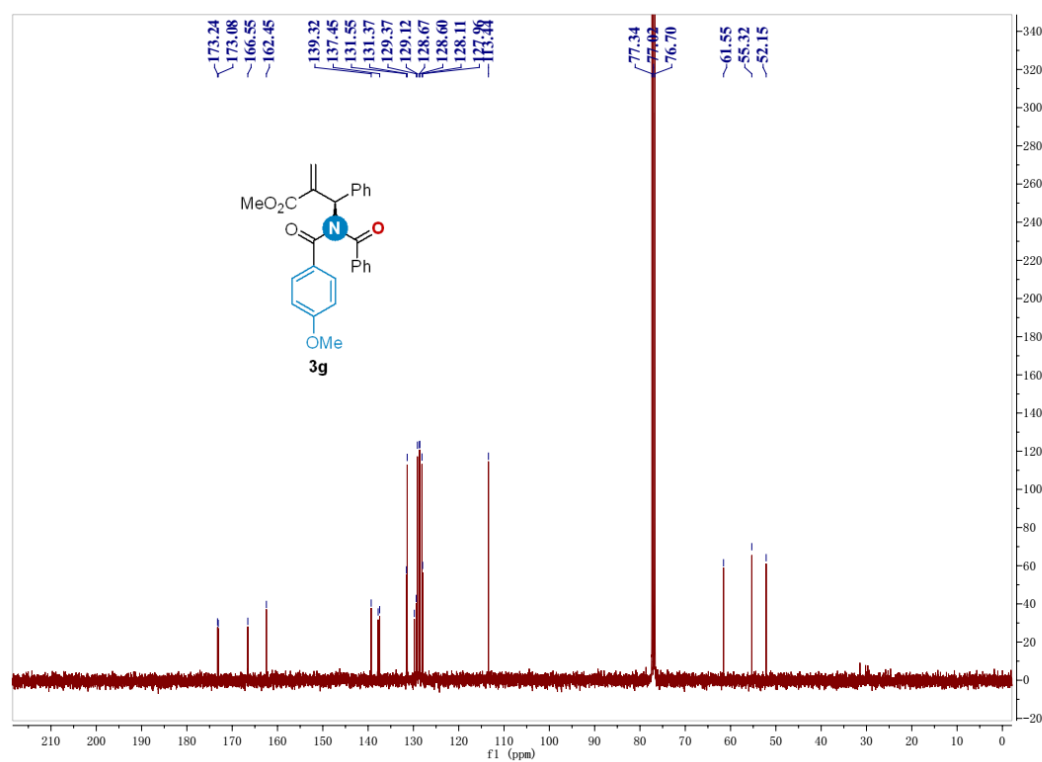

<sup>13</sup>C NMR spectrum of **3g** (100 MHz, CDCl<sub>3</sub>)

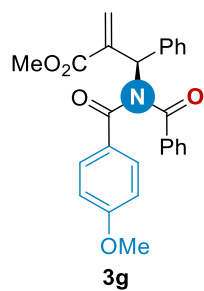

<Chromatogram>

mV

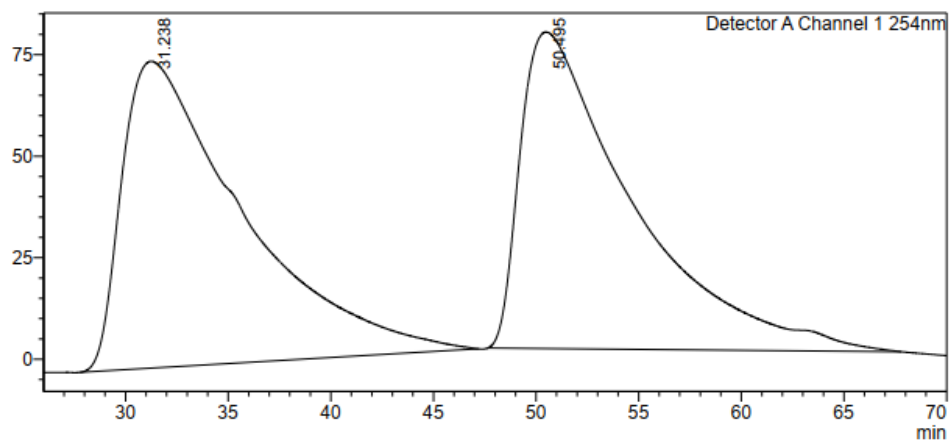

| Peak# | Ret. Time | Area     | Height | Area%   | Height% |
|-------|-----------|----------|--------|---------|---------|
| 1     | 31.238    | 30989283 | 75531  | 51.229  | 49.217  |
| 2     | 50.495    | 29501933 | 77935  | 48.771  | 50.783  |
| Total |           | 60491216 | 153467 | 100.000 | 100.000 |

<Chromatogram>

mV

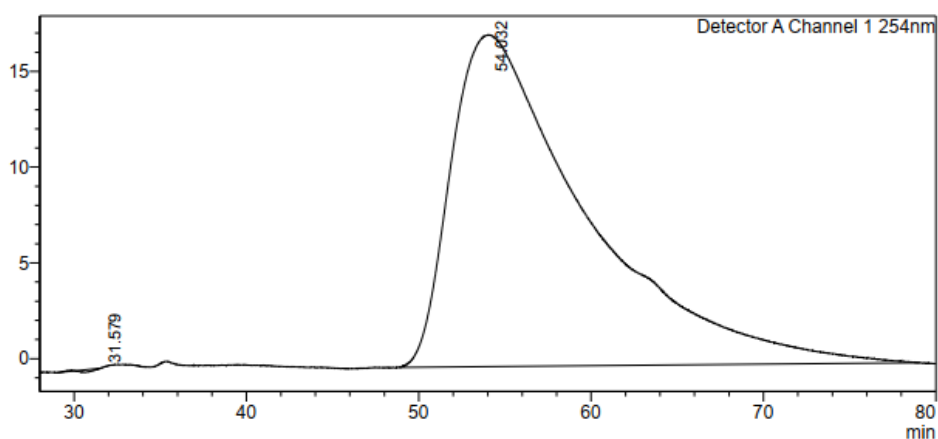

| Peak# | Ret. Time | Area    | Height | Area%   | Height% |
|-------|-----------|---------|--------|---------|---------|
| 1     | 31.579    | -5538   | -3     | -0.058  | -0.017  |
| 2     | 54.032    | 9484316 | 17322  | 100.058 | 100.017 |
| Total |           | 9478779 | 17319  | 100.000 | 100.000 |

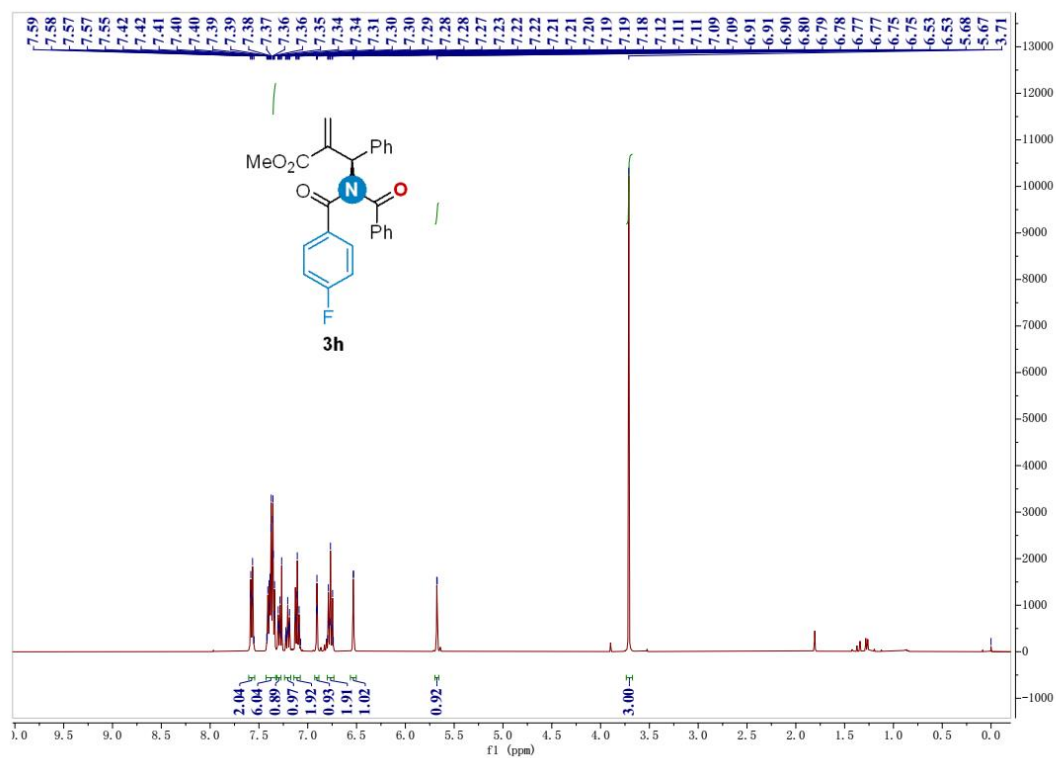

<sup>1</sup>H NMR spectrum of **3h** (400 MHz, CDCl<sub>3</sub>)

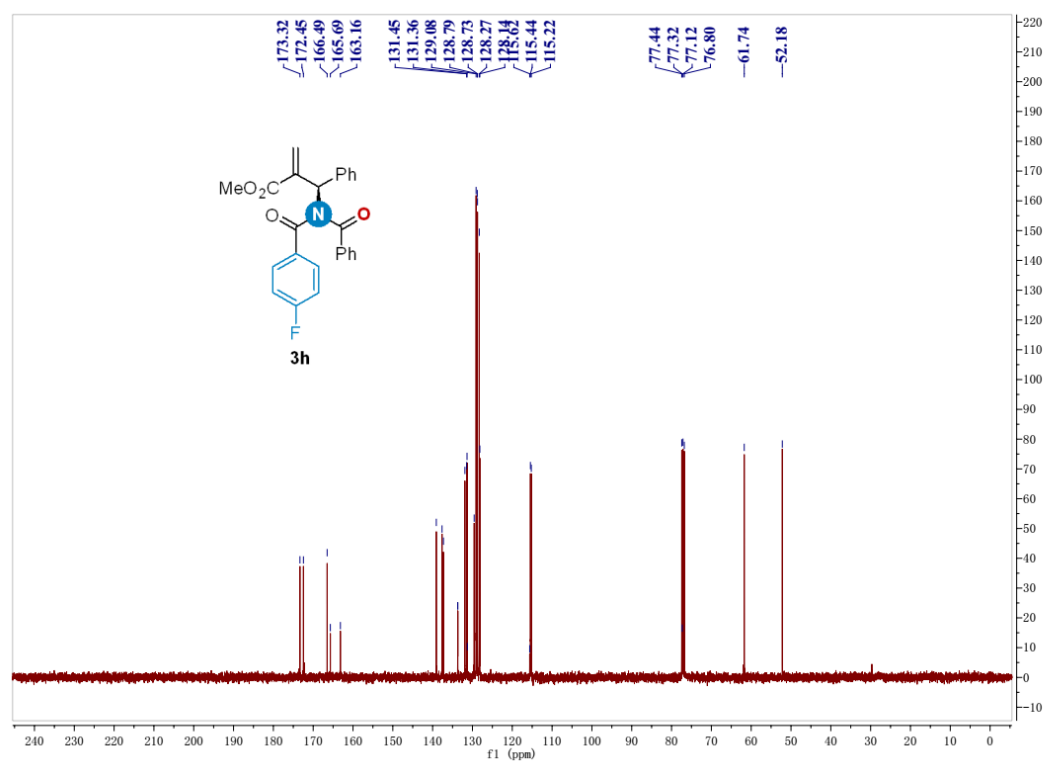

<sup>13</sup>C NMR spectrum of **3h** (100 MHz, CDCl<sub>3</sub>)

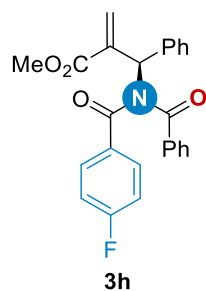

**<Chromatogram>**

mV

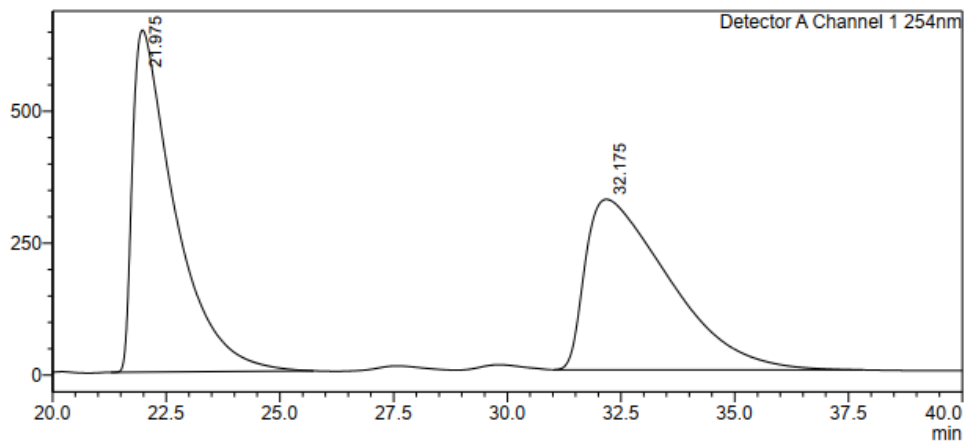

| Peak# | Ret. Time | Area     | Height | Area%   | Height% |
|-------|-----------|----------|--------|---------|---------|
| 1     | 21.975    | 41955879 | 647761 | 50.270  | 66.726  |
| 2     | 32.175    | 41505314 | 323011 | 49.730  | 33.274  |
| Total |           | 83461193 | 970772 | 100.000 | 100.000 |

**<Chromatogram>**

mV

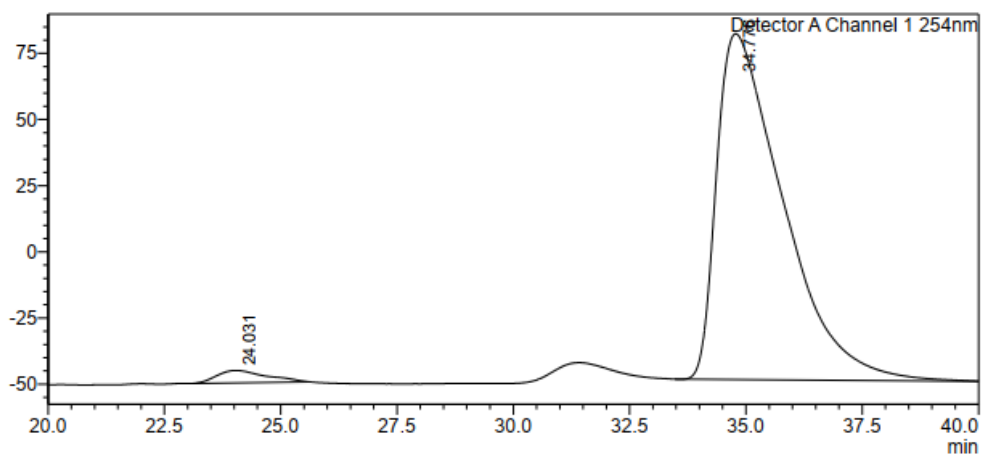

| Peak# | Ret. Time | Area     | Height | Area%   | Height% |
|-------|-----------|----------|--------|---------|---------|
| 1     | 24.031    | 345051   | 4674   | 2.586   | 3.453   |
| 2     | 34.776    | 12996546 | 130660 | 97.414  | 96.547  |
| Total |           | 13341597 | 135334 | 100.000 | 100.000 |

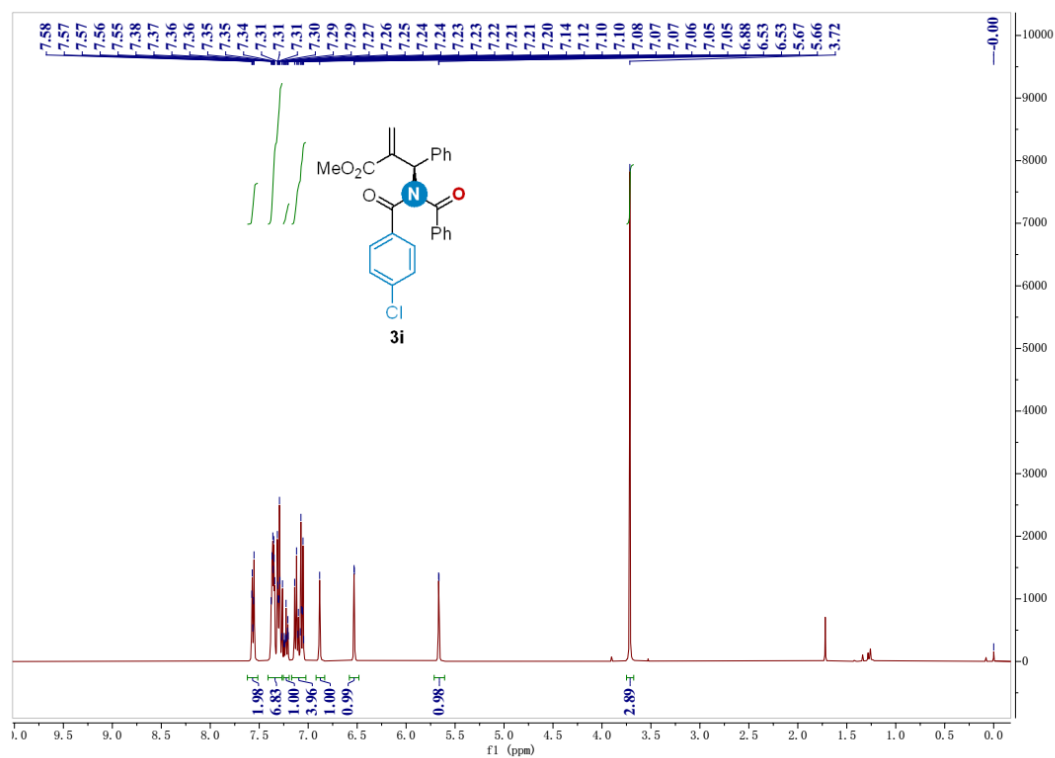

<sup>1</sup>H NMR spectrum of **3i** (400 MHz, CDCl<sub>3</sub>)

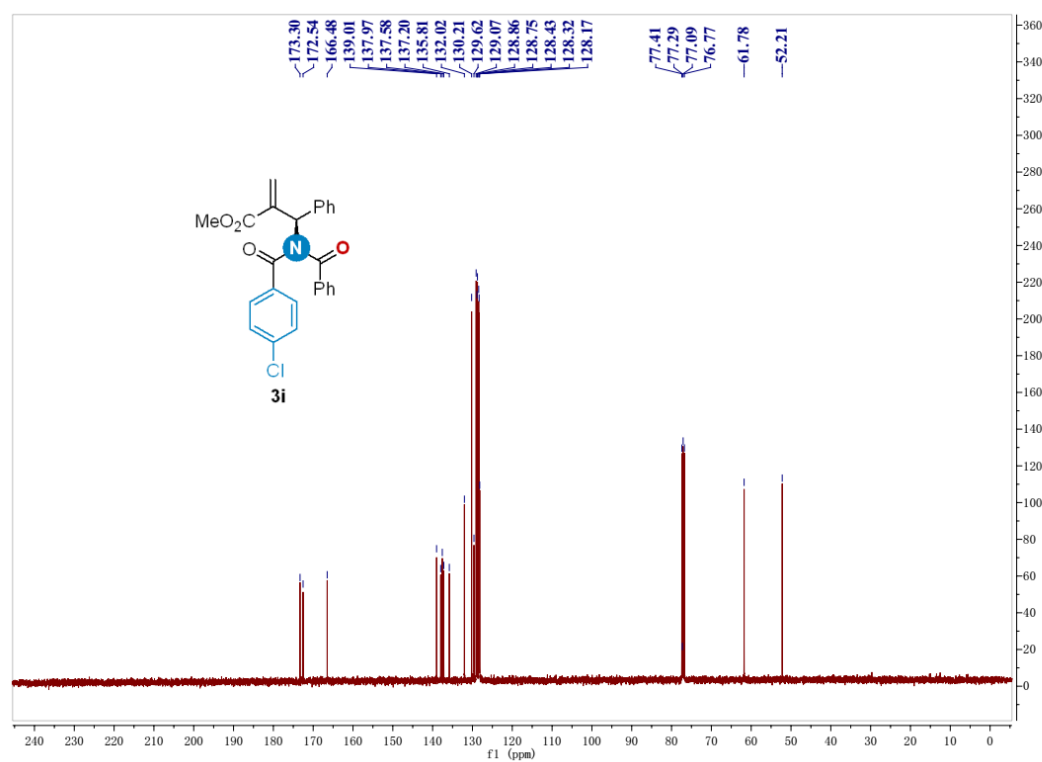

<sup>13</sup>C NMR spectrum of **3i** (100 MHz, CDCl<sub>3</sub>)

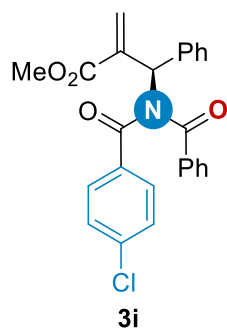

**<Chromatogram>**

mV

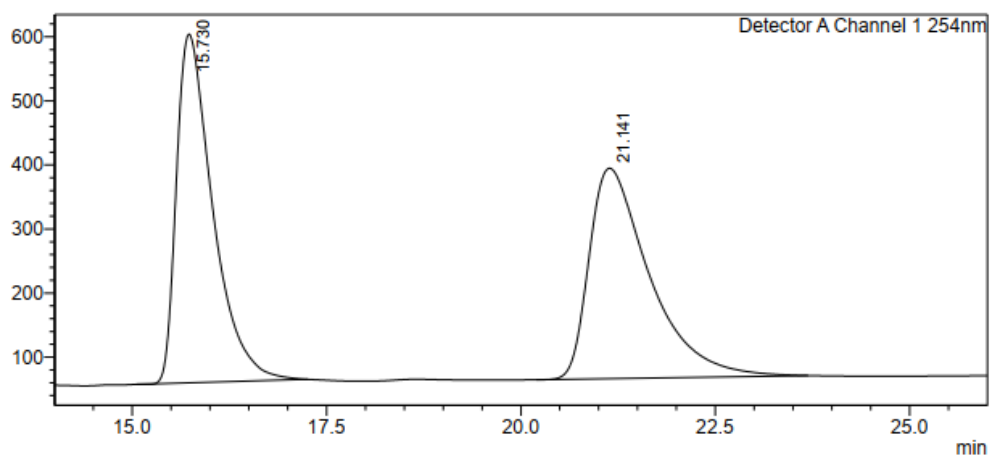

| Peak# | Ret. Time | Area     | Height | Area%   | Height% |
|-------|-----------|----------|--------|---------|---------|
| 1     | 15.730    | 17698368 | 543951 | 49.861  | 62.353  |
| 2     | 21.141    | 17797362 | 328420 | 50.139  | 37.647  |
| Total |           | 35495730 | 872370 | 100.000 | 100.000 |

**<Chromatogram>**

mV

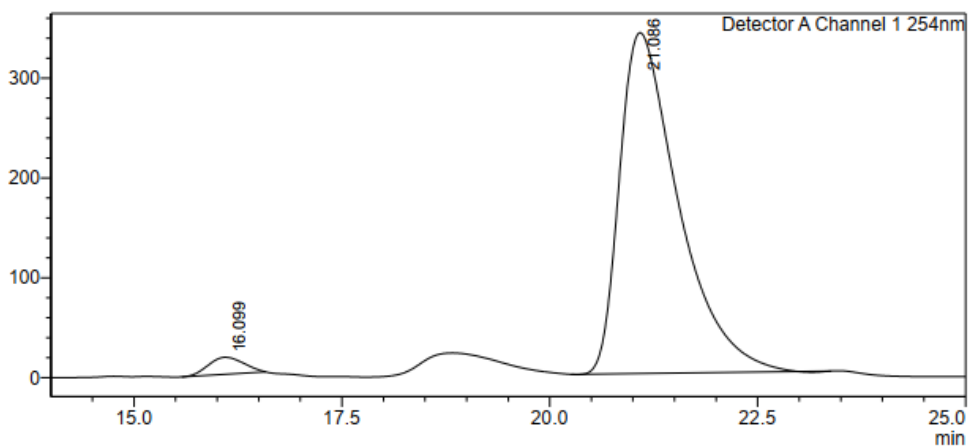

| Peak# | Ret. Time | Area     | Height | Area%   | Height% |
|-------|-----------|----------|--------|---------|---------|
| 1     | 16.099    | 505001   | 17060  | 2.916   | 4.761   |
| 2     | 21.086    | 16813746 | 341266 | 97.084  | 95.239  |
| Total |           | 17318747 | 358327 | 100.000 | 100.000 |

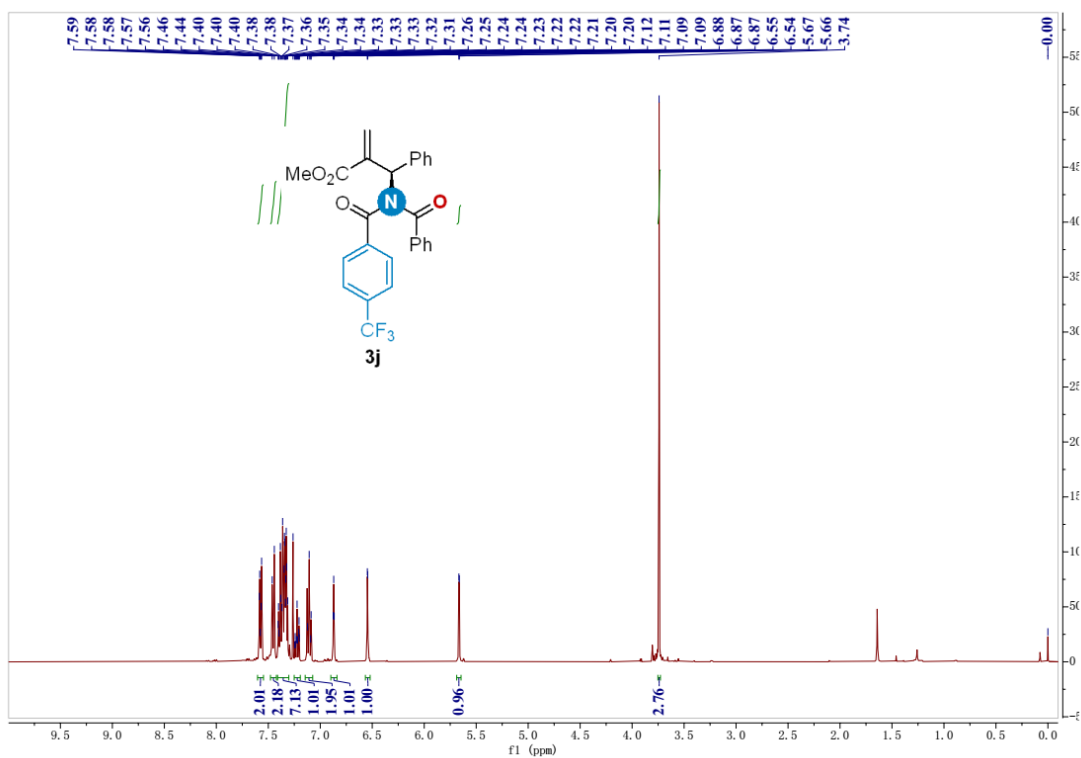

<sup>1</sup>H NMR spectrum of **3j** (400 MHz, CDCl<sub>3</sub>)

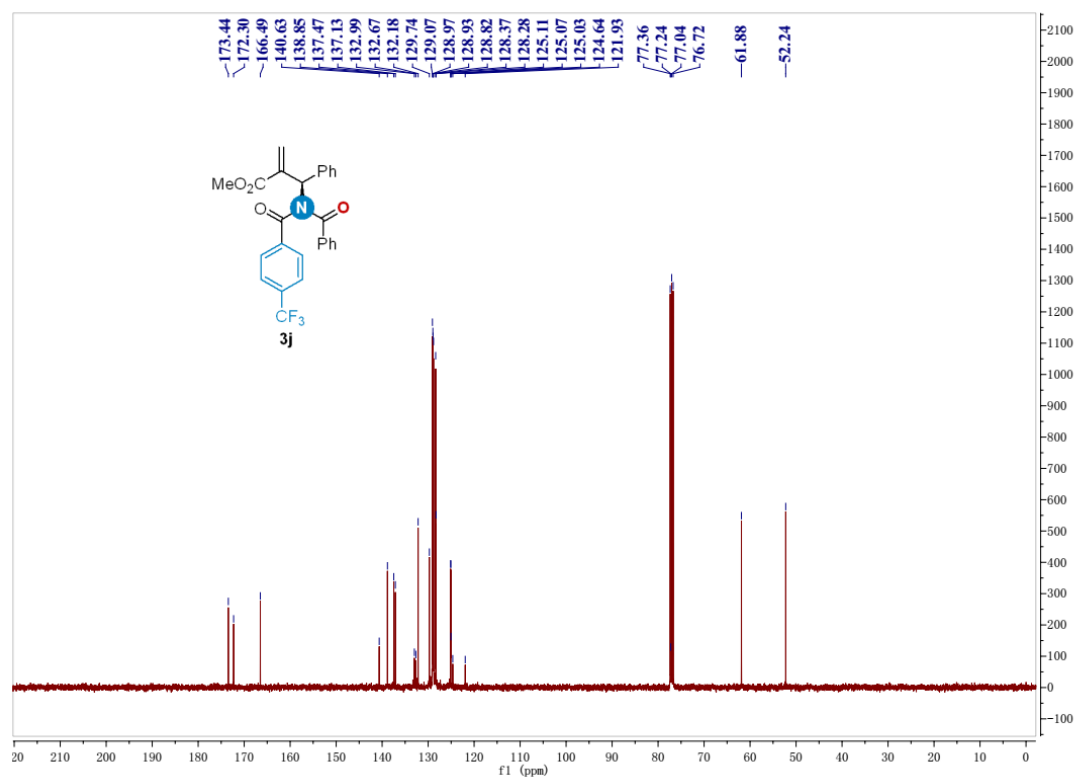

<sup>13</sup>C NMR spectrum of **3j** (100 MHz, CDCl<sub>3</sub>)

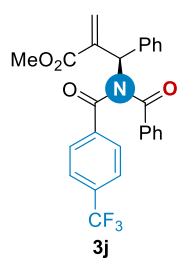

<Chromatogram>

mV

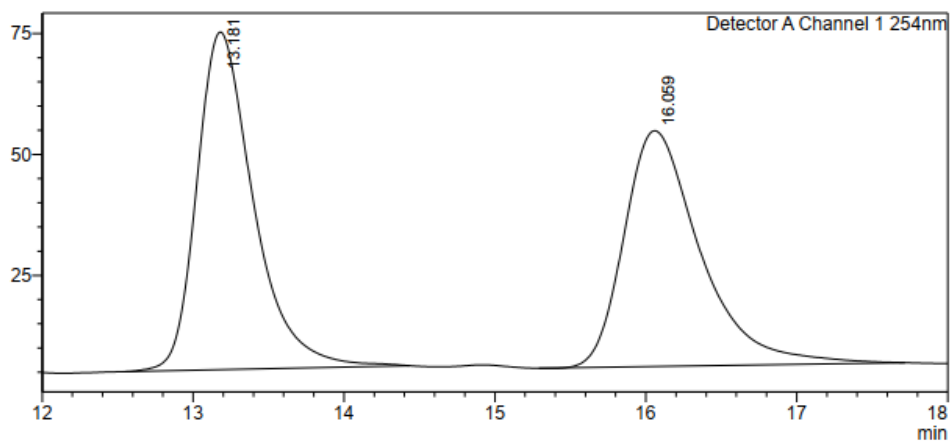

| Peak# | Ret. Time | Area    | Height | Area%   | Height% |
|-------|-----------|---------|--------|---------|---------|
| 1     | 13.181    | 1824913 | 69771  | 51.526  | 58.873  |
| 2     | 16.059    | 1716837 | 48741  | 48.474  | 41.127  |
| Total |           | 3541750 | 118512 | 100.000 | 100.000 |

<Chromatogram>

mV

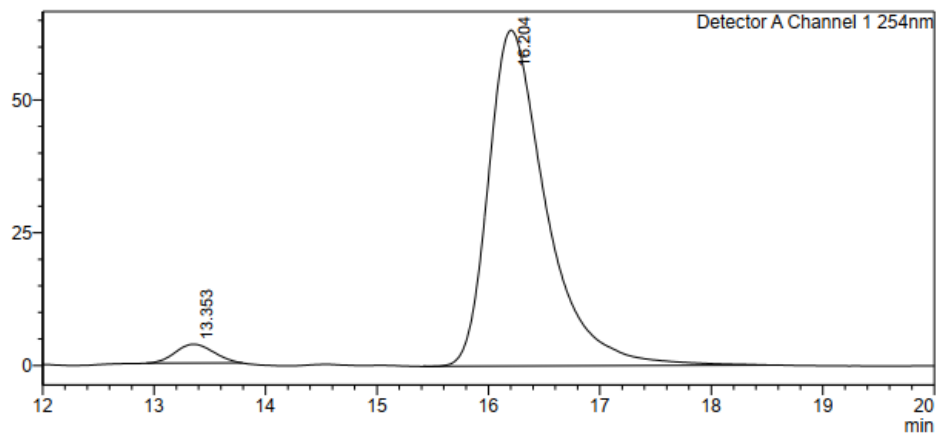

| Peak# | Ret. Time | Area    | Height | Area%   | Height% |
|-------|-----------|---------|--------|---------|---------|
| 1     | 13.353    | 85089   | 3545   | 3.598   | 5.307   |
| 2     | 16.204    | 2279789 | 63258  | 96.402  | 94.693  |
| Total |           | 2364877 | 66803  | 100.000 | 100.000 |



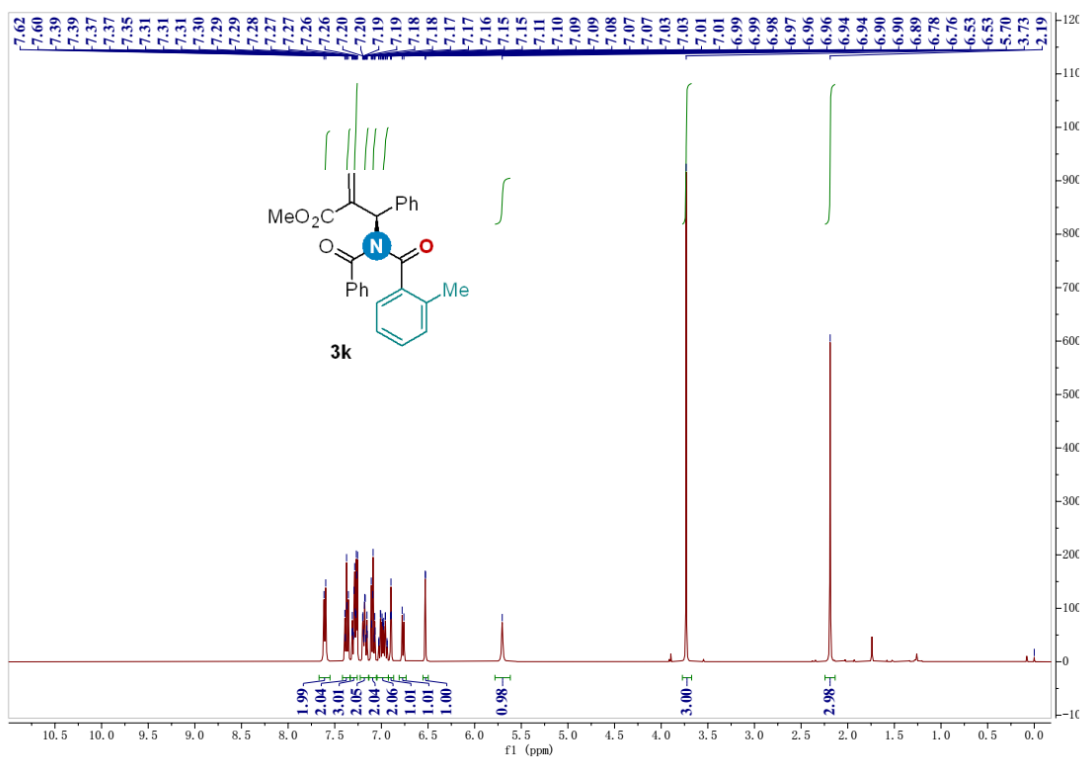

<sup>1</sup>H NMR spectrum of **3k** (400 MHz, CDCl<sub>3</sub>)

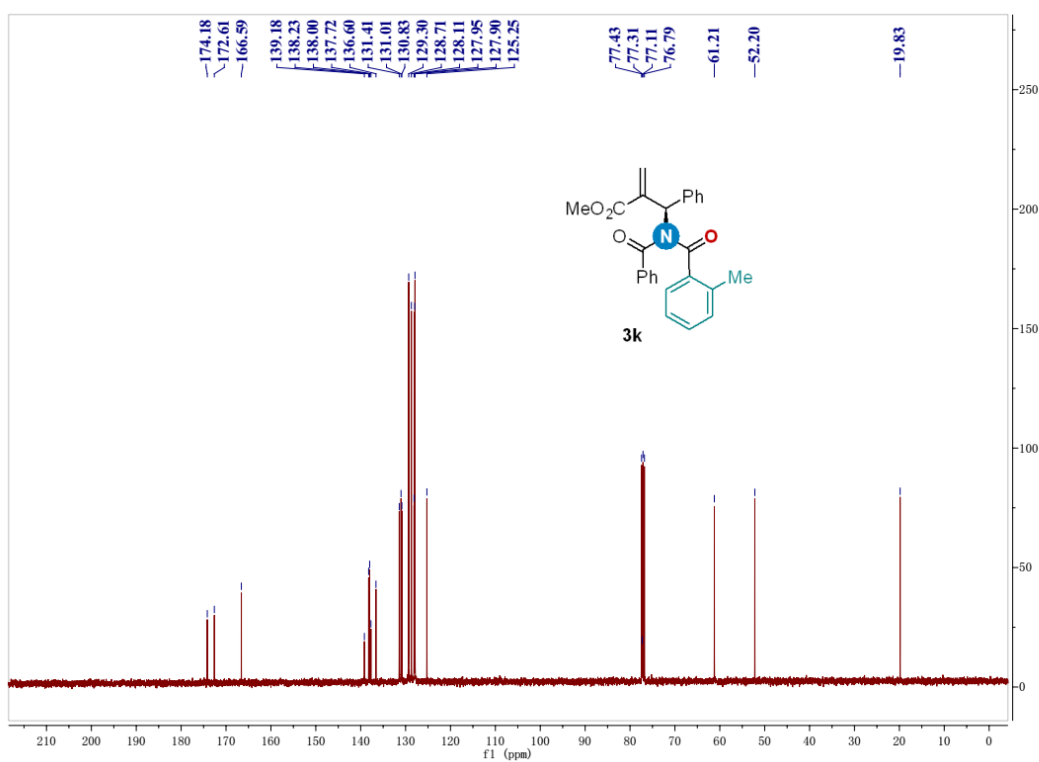

<sup>13</sup>C NMR spectrum of **3k** (100 MHz, CDCl<sub>3</sub>)

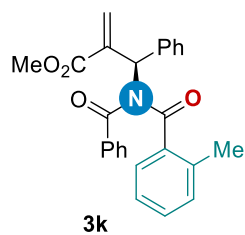

**<Chromatogram>**

mV

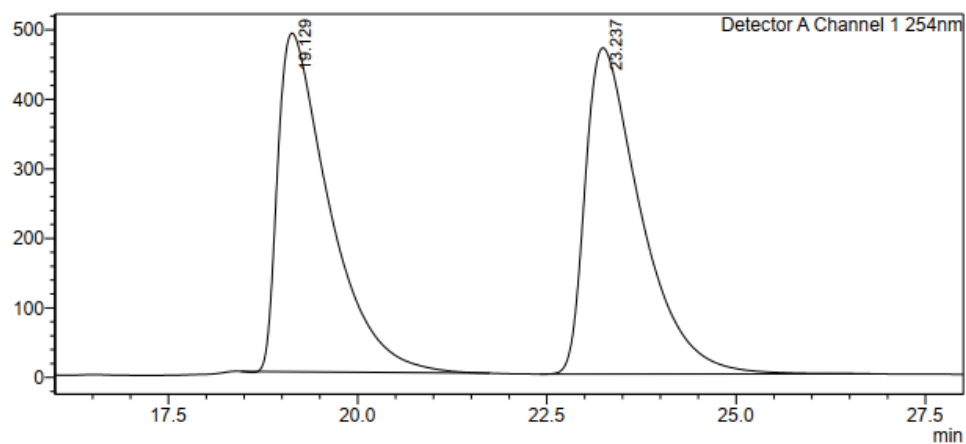

| Peak# | Ret. Time | Area     | Height | Area%   | Height% |
|-------|-----------|----------|--------|---------|---------|
| 1     | 19.129    | 23080541 | 487129 | 49.035  | 50.938  |
| 2     | 23.237    | 23989058 | 469196 | 50.965  | 49.062  |
| Total |           | 47069599 | 956325 | 100.000 | 100.000 |

**<Chromatogram>**

mV

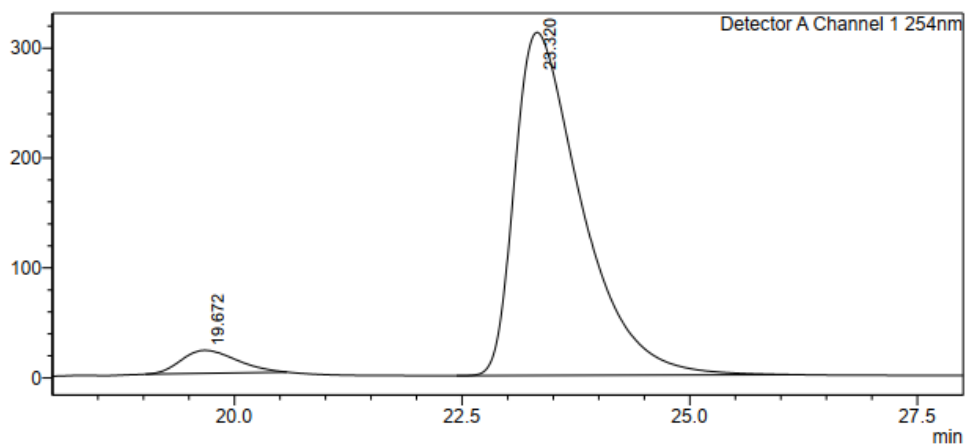

| Peak# | Ret. Time | Area     | Height | Area%   | Height% |
|-------|-----------|----------|--------|---------|---------|
| 1     | 19.672    | 889150   | 20892  | 5.268   | 6.274   |
| 2     | 23.320    | 15989155 | 312097 | 94.732  | 93.726  |
| Total |           | 16878305 | 332989 | 100.000 | 100.000 |

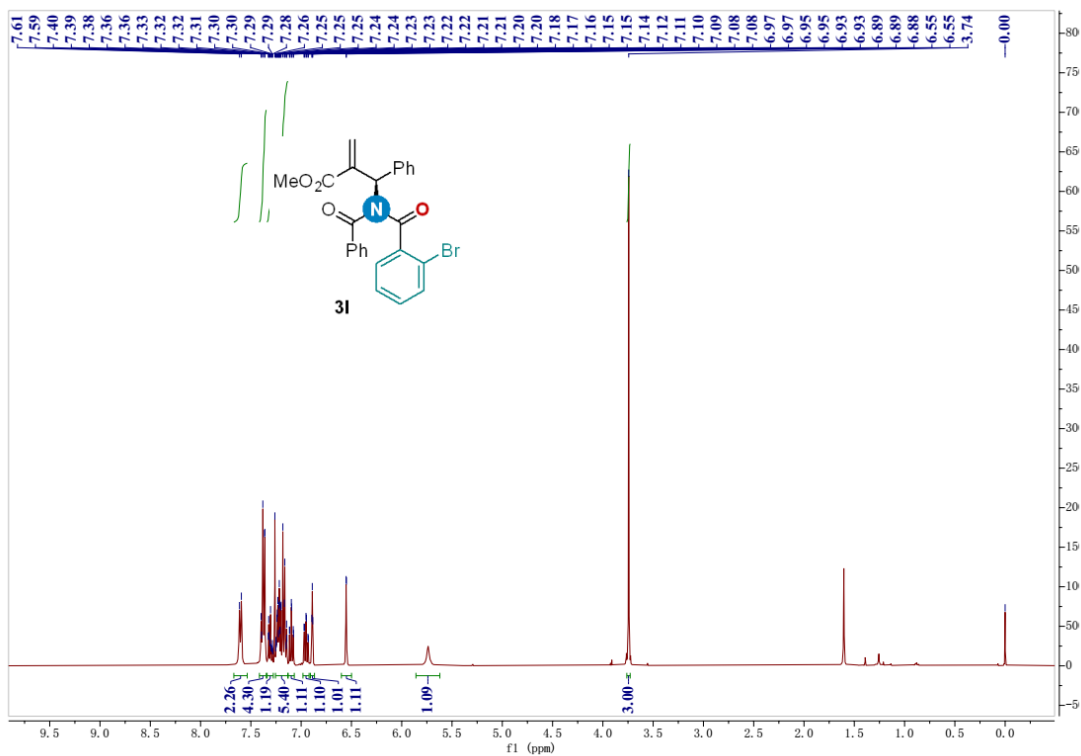

<sup>1</sup>H NMR spectrum of **3I** (400 MHz, CDCl<sub>3</sub>)

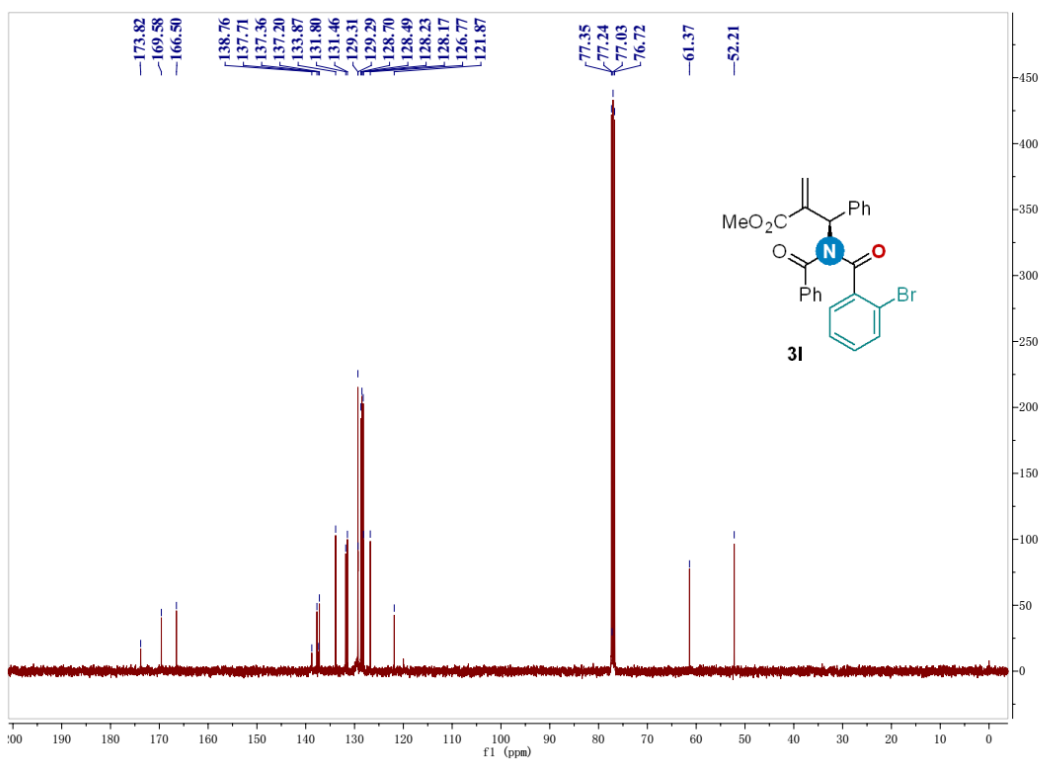

<sup>13</sup>C NMR spectrum of **3I** (100 MHz, CDCl<sub>3</sub>)

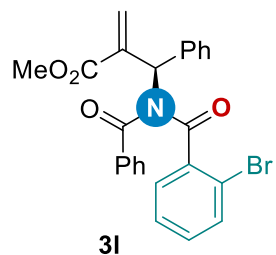

**<Chromatogram>**

mV

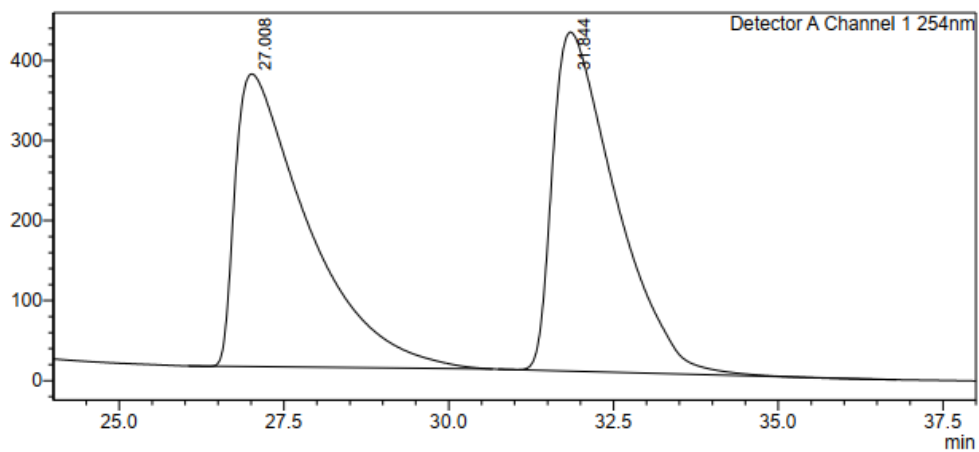

| Peak# | Ret. Time | Area     | Height | Area%   | Height% |
|-------|-----------|----------|--------|---------|---------|
| 1     | 27.008    | 28129907 | 365510 | 49.901  | 46.333  |
| 2     | 31.844    | 28242083 | 423361 | 50.099  | 53.667  |
| Total |           | 56371990 | 788872 | 100.000 | 100.000 |

**<Chromatogram>**

mV

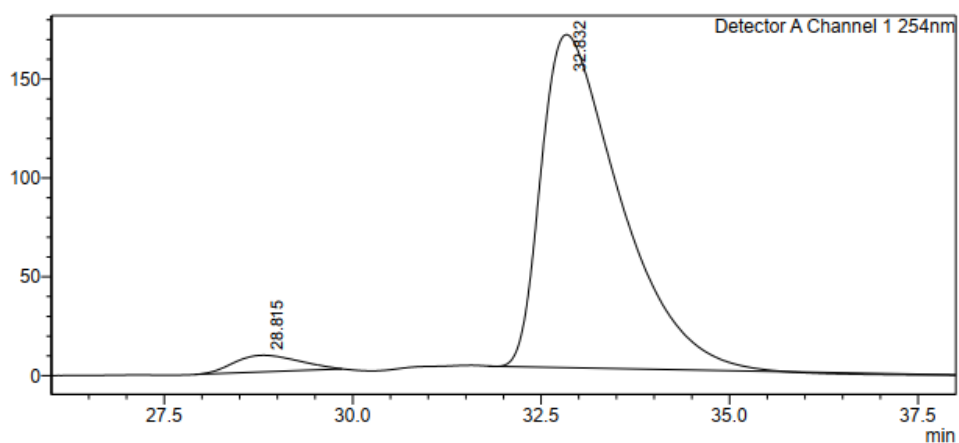

| Peak# | Ret. Time | Area     | Height | Area%   | Height% |
|-------|-----------|----------|--------|---------|---------|
| 1     | 28.815    | 502595   | 8382   | 3.943   | 4.742   |
| 2     | 32.832    | 12245353 | 168395 | 96.057  | 95.258  |
| Total |           | 12747948 | 176777 | 100.000 | 100.000 |

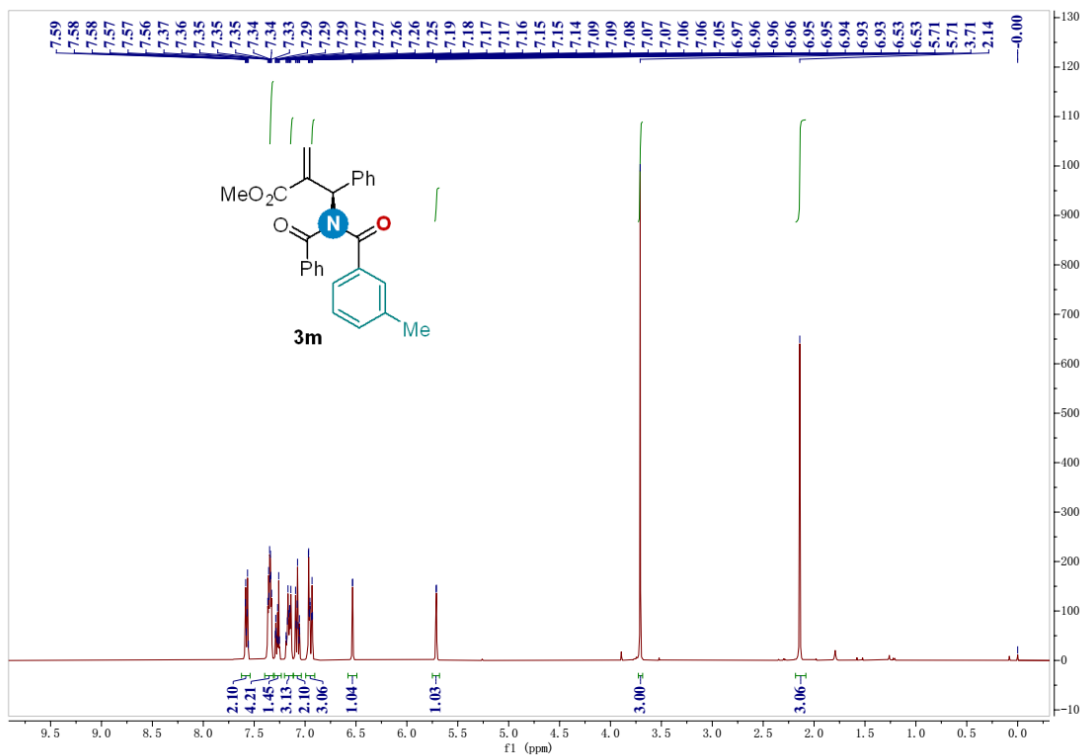

<sup>1</sup>H NMR spectrum of **3m** (400 MHz, CDCl<sub>3</sub>)

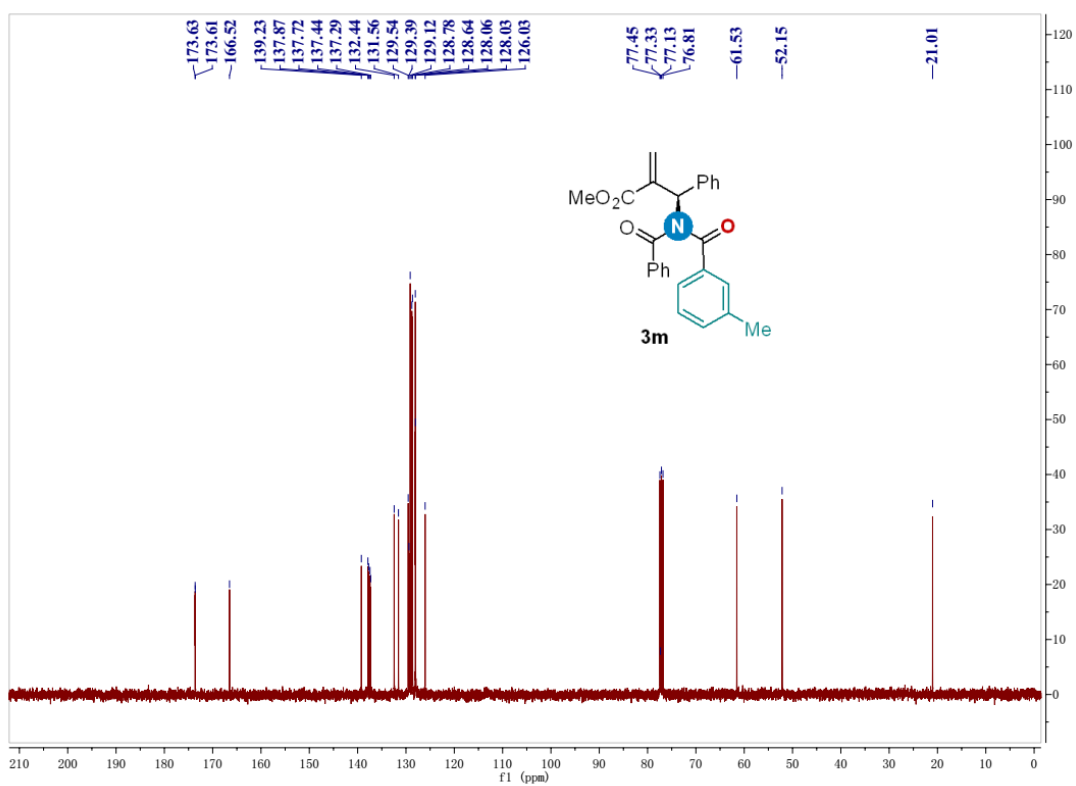

<sup>13</sup>C NMR spectrum of **3m** (100 MHz, CDCl<sub>3</sub>)

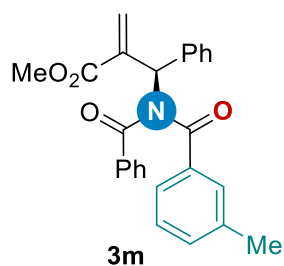

**<Chromatogram>**

mV

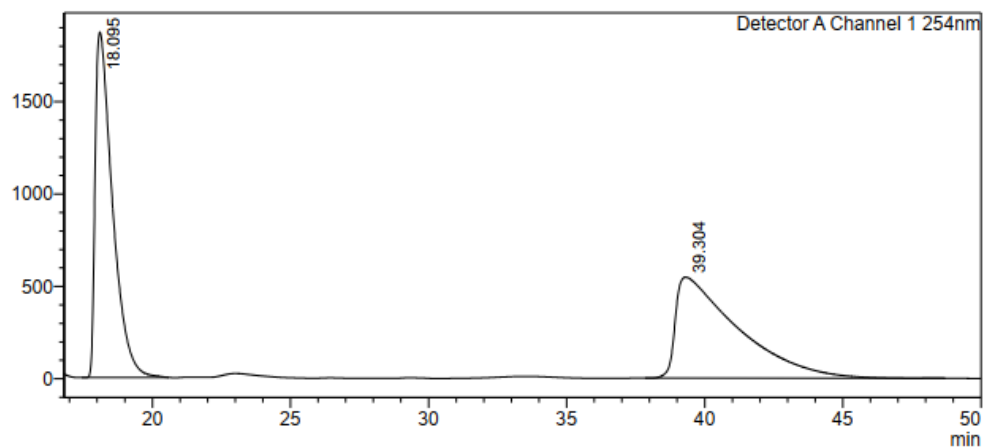

| Peak# | Ret. Time | Area      | Height  | Area%   | Height% |
|-------|-----------|-----------|---------|---------|---------|
| 1     | 18.095    | 81561545  | 1868425 | 48.880  | 77.386  |
| 2     | 39.304    | 85299609  | 546003  | 51.120  | 22.614  |
| Total |           | 166861153 | 2414428 | 100.000 | 100.000 |

**<Chromatogram>**

mV

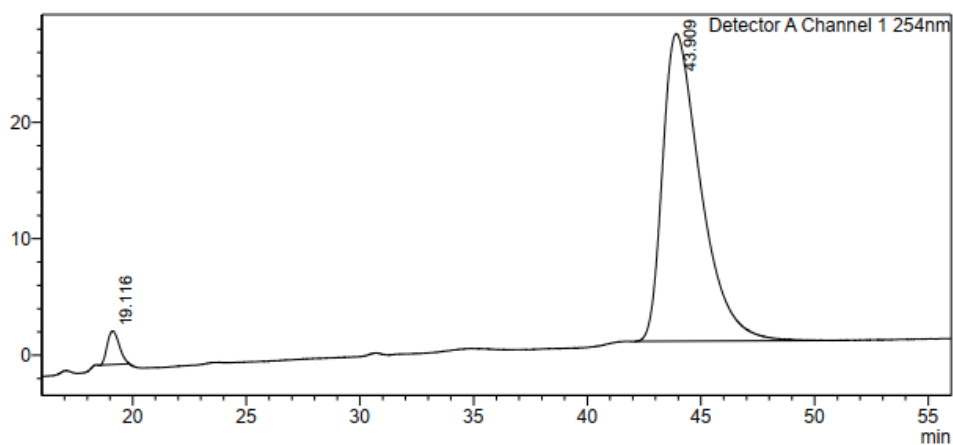

| Peak# | Ret. Time | Area    | Height | Area%   | Height% |
|-------|-----------|---------|--------|---------|---------|
| 1     | 19.116    | 104457  | 2867   | 3.279   | 9.793   |
| 2     | 43.909    | 3080955 | 26408  | 96.721  | 90.207  |
| Total |           | 3185411 | 29274  | 100.000 | 100.000 |

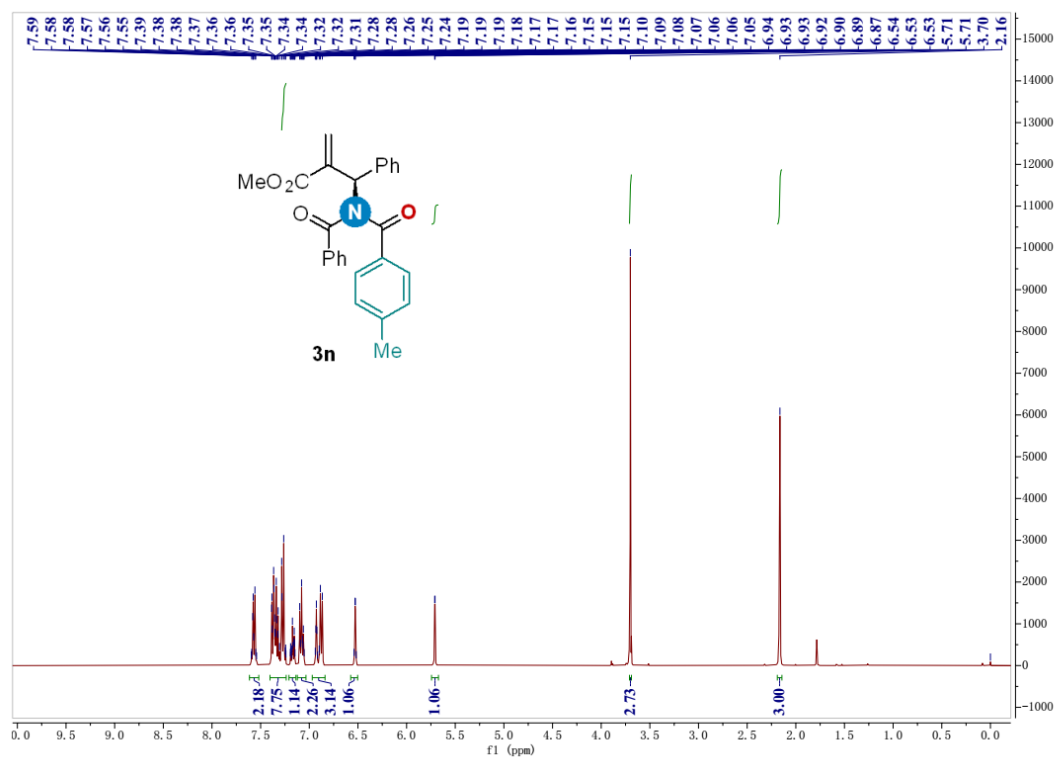

<sup>1</sup>H NMR spectrum of **3n** (400 MHz, CDCl<sub>3</sub>)

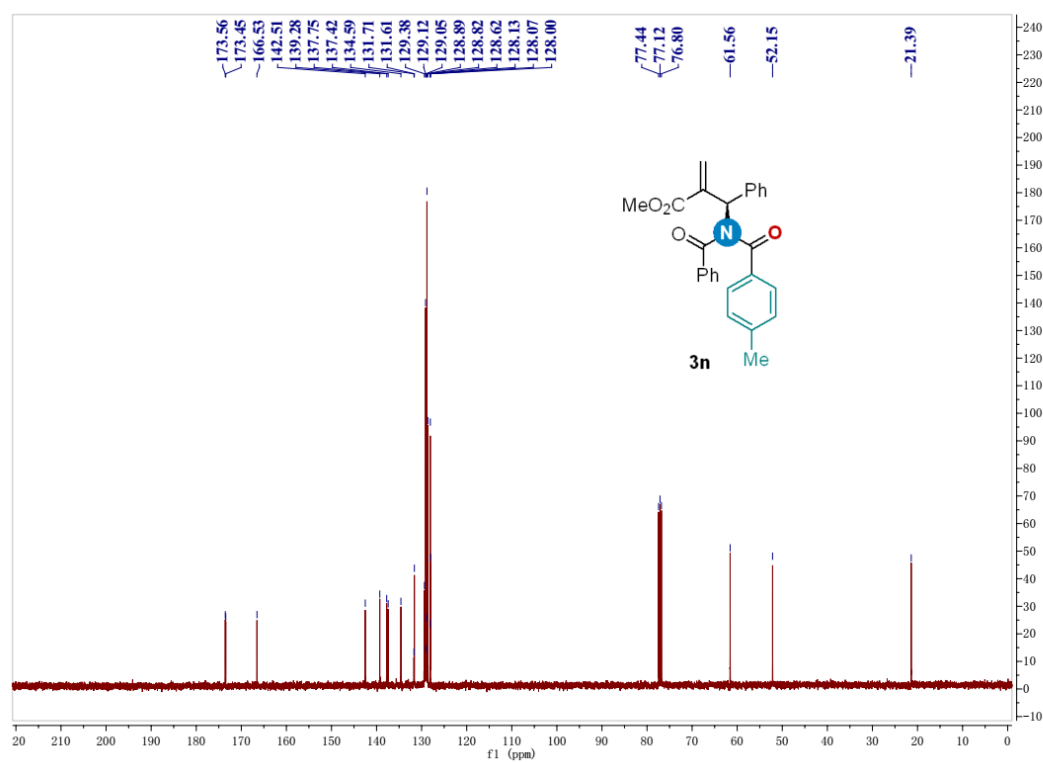

<sup>13</sup>C NMR spectrum of **3n** (100 MHz, CDCl<sub>3</sub>)

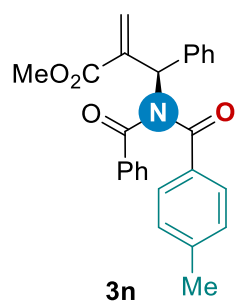

**<Chromatogram>**

mV

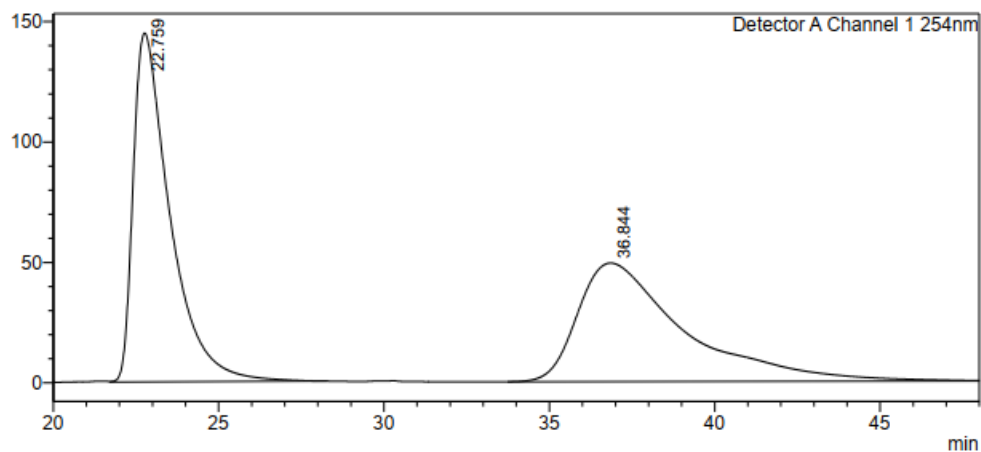

| Peak# | Ret. Time | Area     | Height | Area%   | Height% |
|-------|-----------|----------|--------|---------|---------|
| 1     | 22.759    | 11215341 | 144777 | 50.516  | 74.613  |
| 2     | 36.844    | 10986016 | 49259  | 49.484  | 25.387  |
| Total |           | 22201357 | 194036 | 100.000 | 100.000 |

**<Chromatogram>**

mV

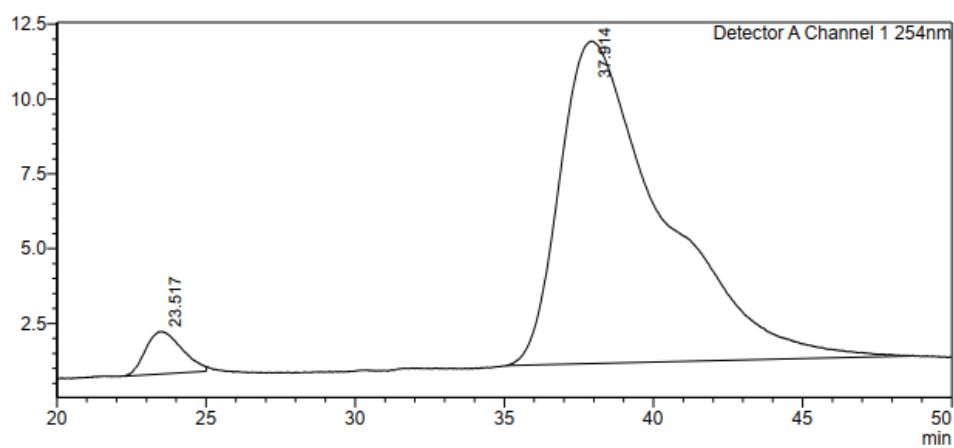

| Peak# | Ret. Time | Area    | Height | Area%   | Height% |
|-------|-----------|---------|--------|---------|---------|
| 1     | 23.517    | 120211  | 1410   | 4.428   | 11.578  |
| 2     | 37.914    | 2594871 | 10767  | 95.572  | 88.422  |
| Total |           | 2715082 | 12177  | 100.000 | 100.000 |



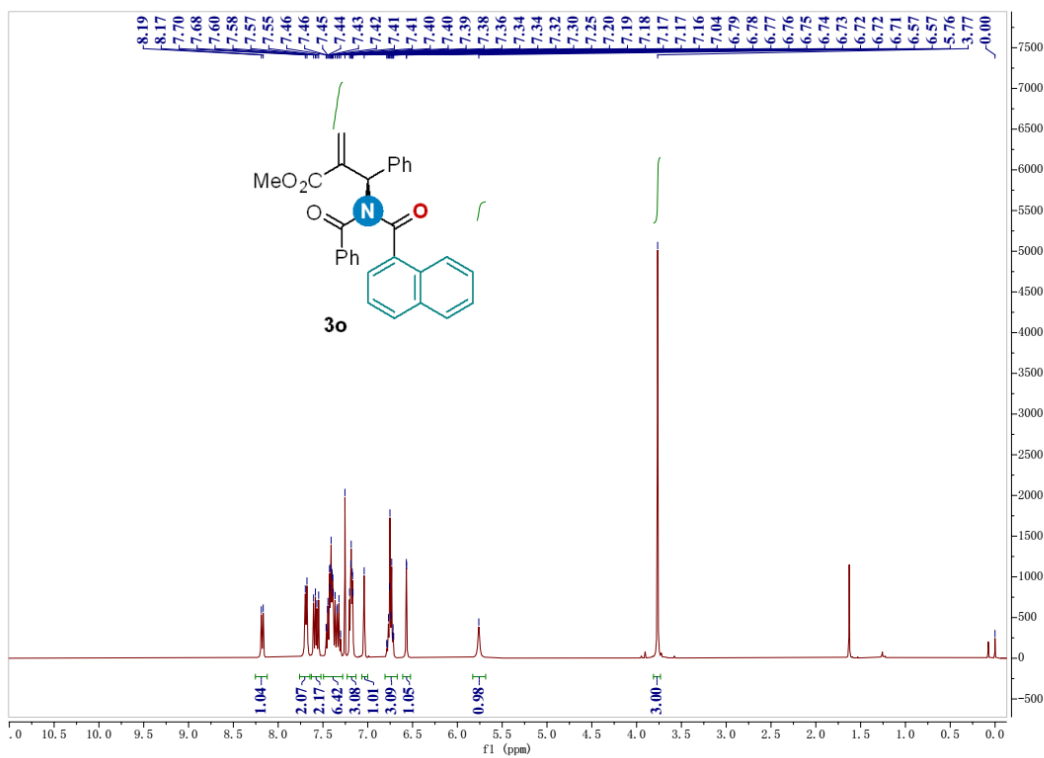

<sup>1</sup>H NMR spectrum of **3o** (400 MHz, CDCl<sub>3</sub>)

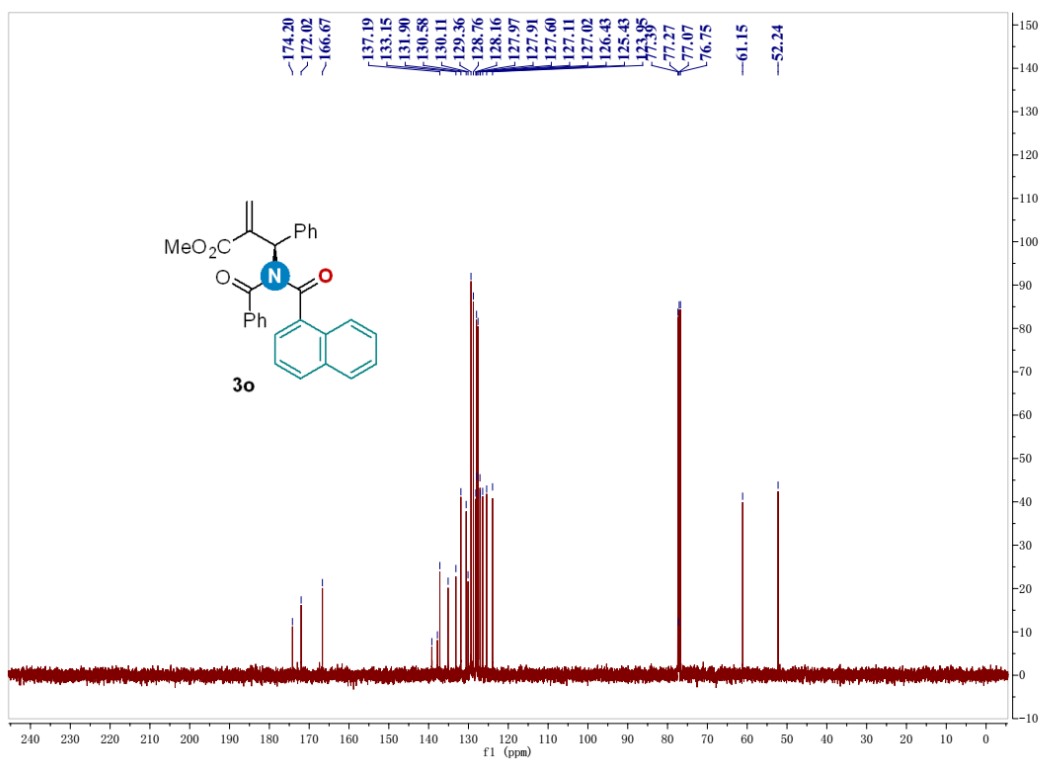

<sup>13</sup>C NMR spectrum of **3o** (100 MHz, CDCl<sub>3</sub>)

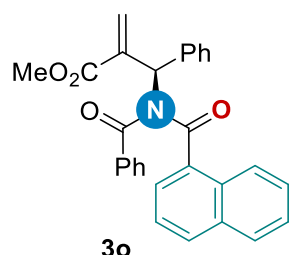

**<Chromatogram>**

mV

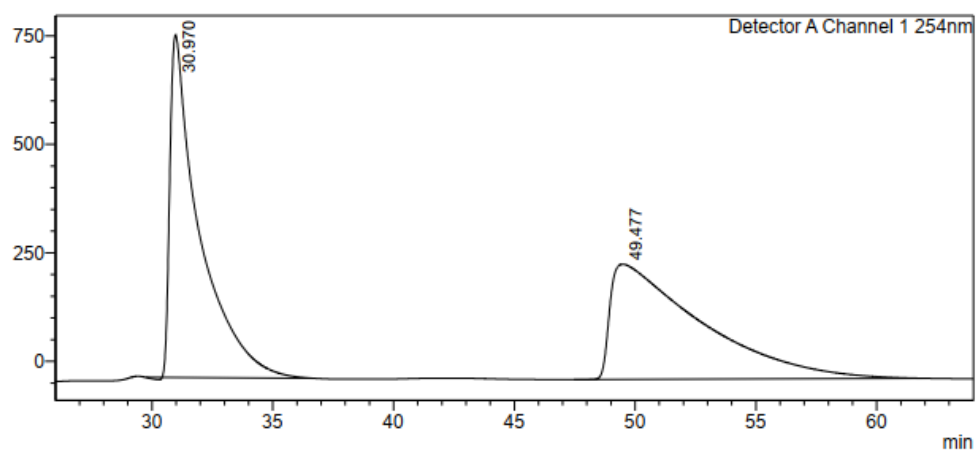

| Peak# | Ret. Time | Area      | Height  | Area%   | Height% |
|-------|-----------|-----------|---------|---------|---------|
| 1     | 30.970    | 66614868  | 789340  | 49.029  | 74.834  |
| 2     | 49.477    | 69253194  | 265451  | 50.971  | 25.166  |
| Total |           | 135868062 | 1054791 | 100.000 | 100.000 |

**<Chromatogram>**

mV

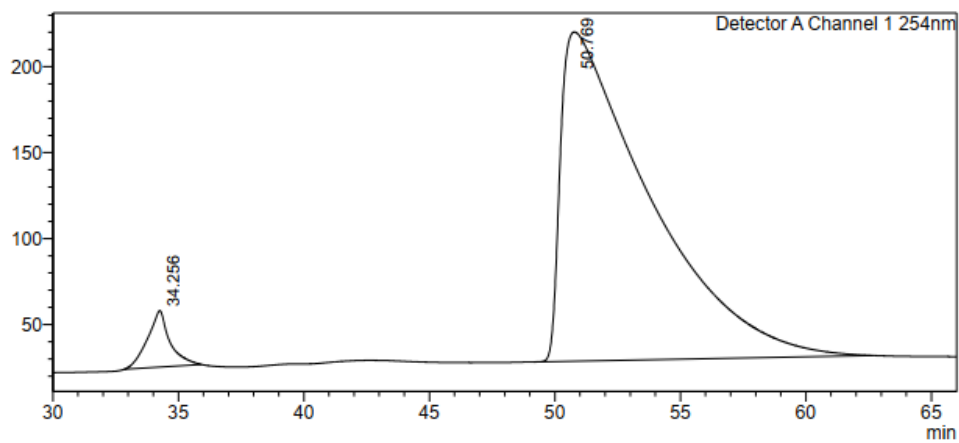

| Peak# | Ret. Time | Area     | Height | Area%   | Height% |
|-------|-----------|----------|--------|---------|---------|
| 1     | 34.256    | 2024517  | 32815  | 4.120   | 14.632  |
| 2     | 50.769    | 47114549 | 191450 | 95.880  | 85.368  |
| Total |           | 49139067 | 224264 | 100.000 | 100.000 |

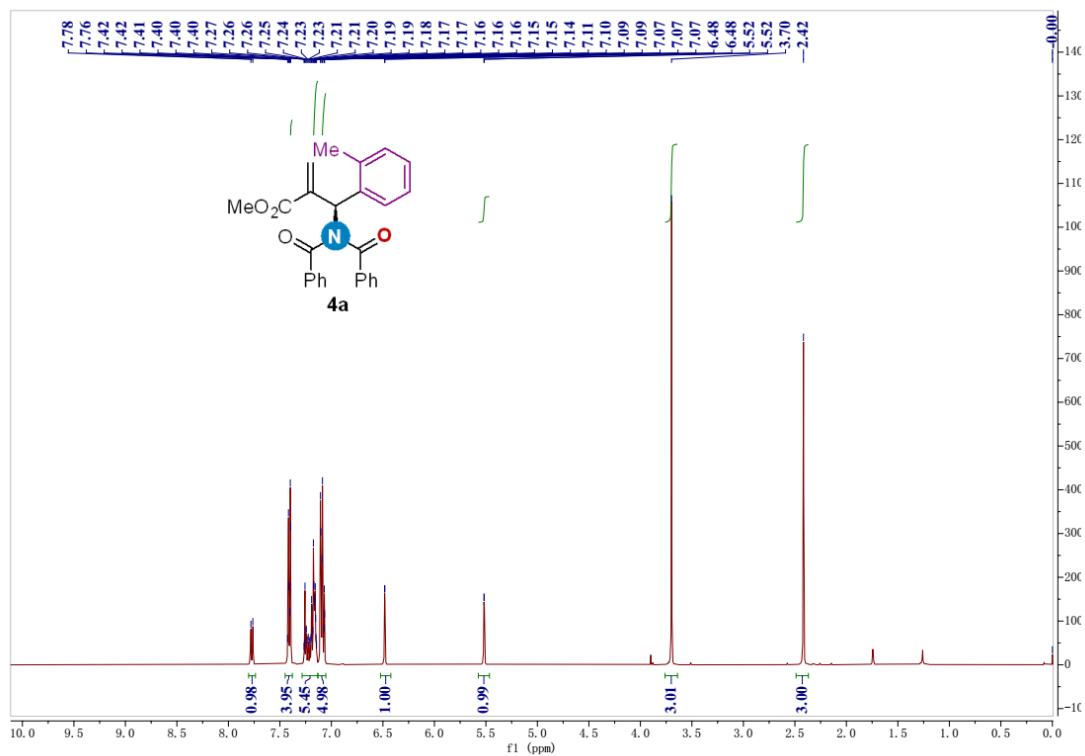

<sup>1</sup>H NMR spectrum of **4a** (400 MHz, CDCl<sub>3</sub>)

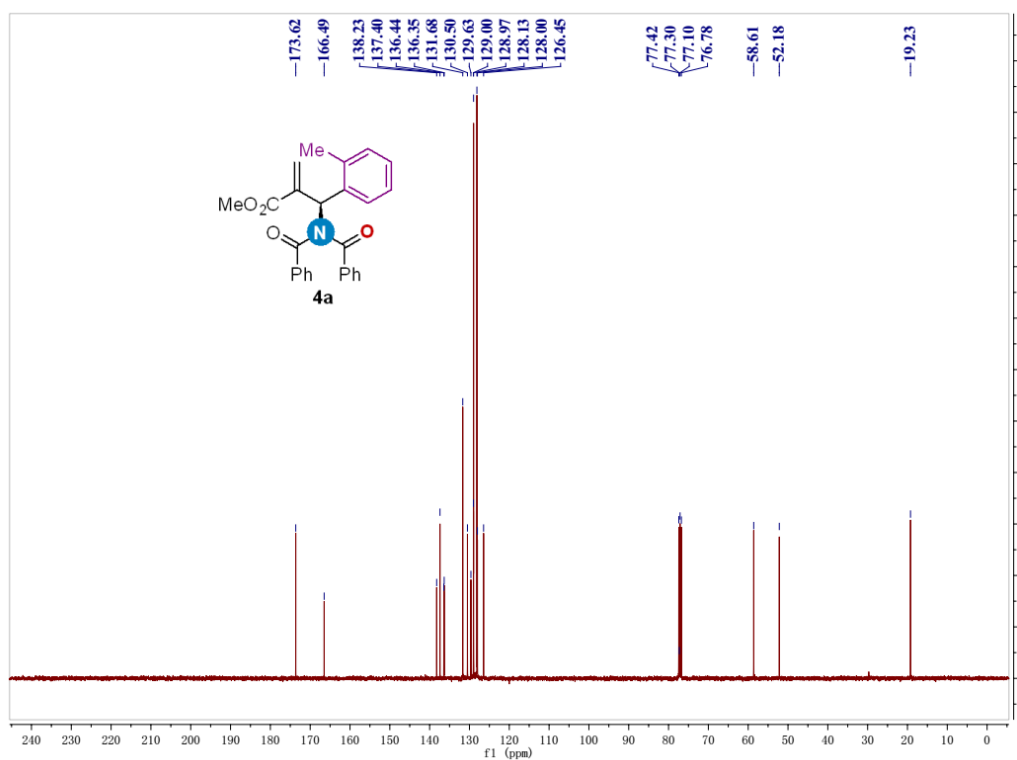

<sup>13</sup>C NMR spectrum of **4a** (100 MHz, CDCl<sub>3</sub>)

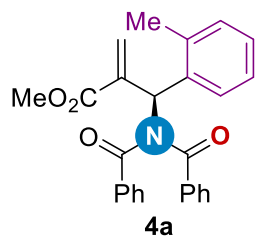

**<Chromatogram>**

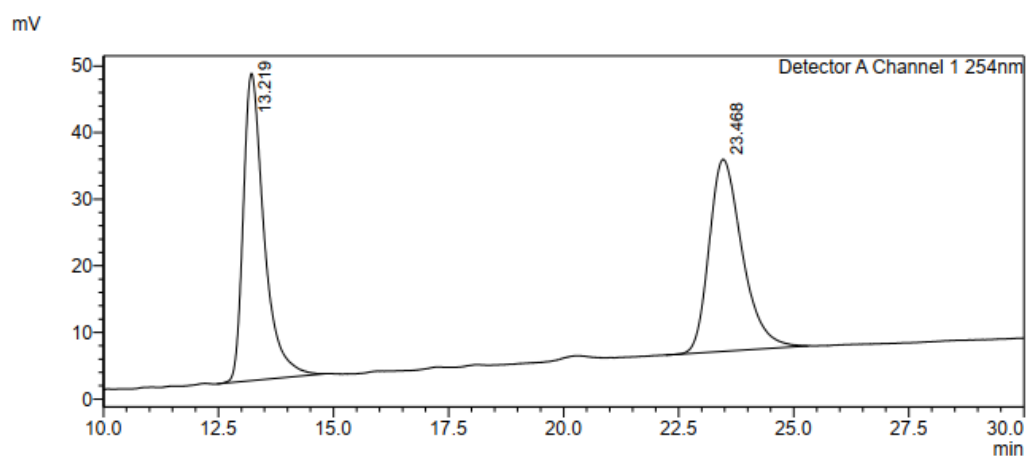

| Peak# | Ret. Time | Area    | Height | Area%   | Height% |
|-------|-----------|---------|--------|---------|---------|
| 1     | 13.219    | 1455370 | 46113  | 50.207  | 61.537  |
| 2     | 23.468    | 1443364 | 28822  | 49.793  | 38.463  |
| Total |           | 2898734 | 74935  | 100.000 | 100.000 |

**<Chromatogram>**

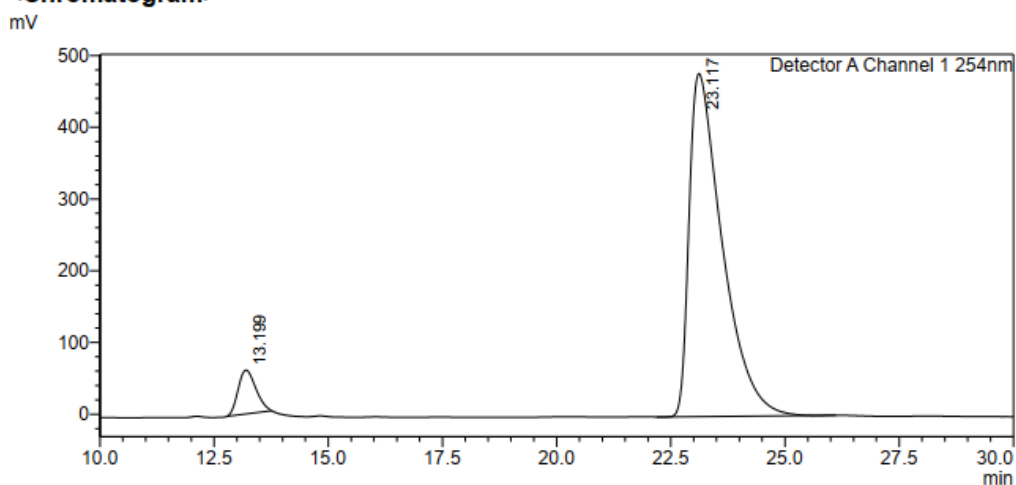

| Peak# | Ret. Time | Area     | Height | Area%   | Height% |
|-------|-----------|----------|--------|---------|---------|
| 1     | 13.199    | 1639542  | 60953  | 6.366   | 11.307  |
| 2     | 23.117    | 24114414 | 478129 | 93.634  | 88.693  |
| Total |           | 25753956 | 539083 | 100.000 | 100.000 |

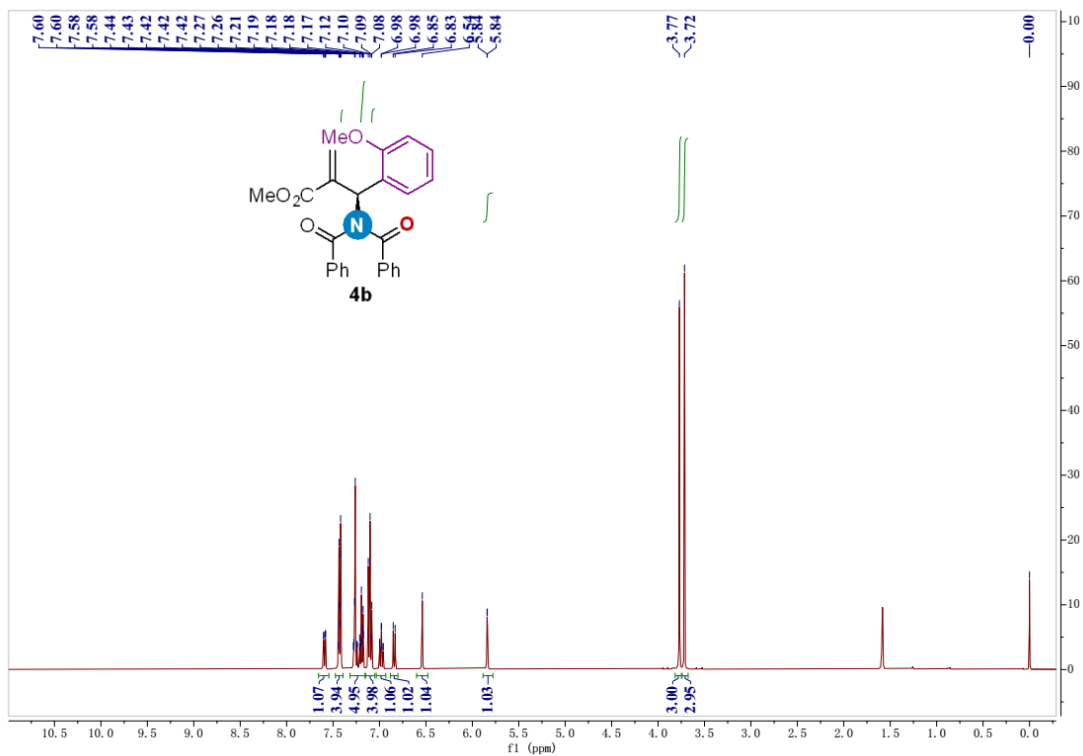

<sup>1</sup>H NMR spectrum of **4b** (400 MHz, CDCl<sub>3</sub>)

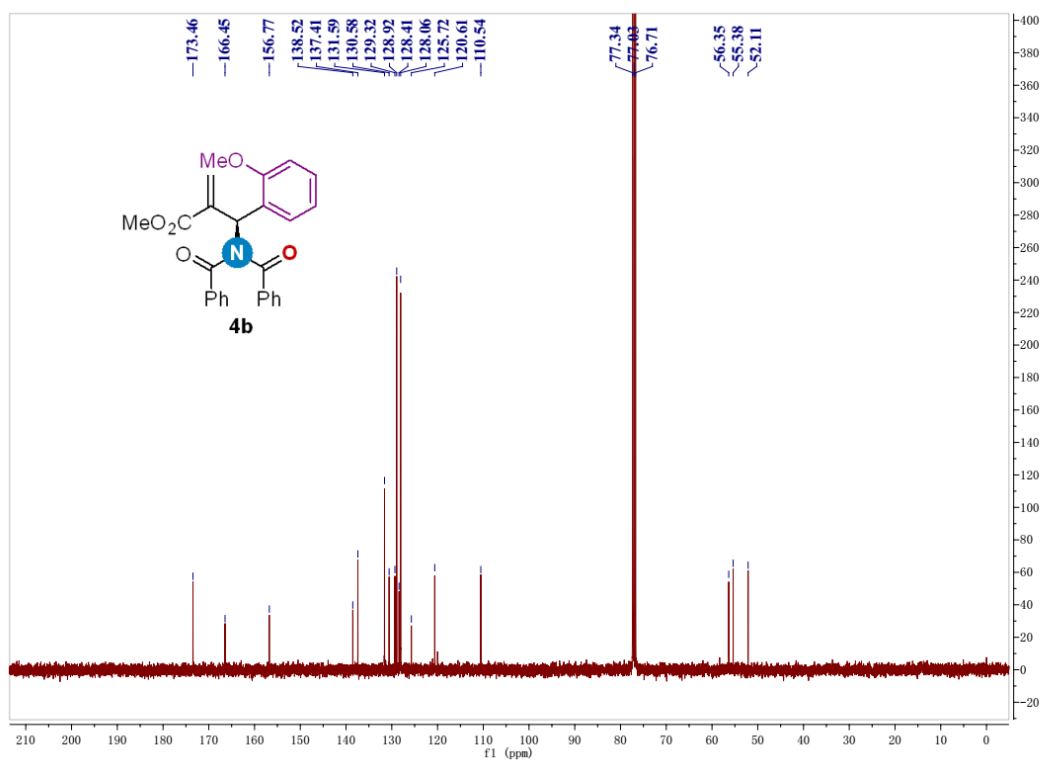

<sup>13</sup>C NMR spectrum of **4b** (100 MHz, CDCl<sub>3</sub>)

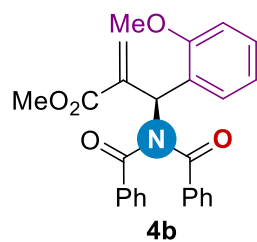

<Chromatogram>

mV

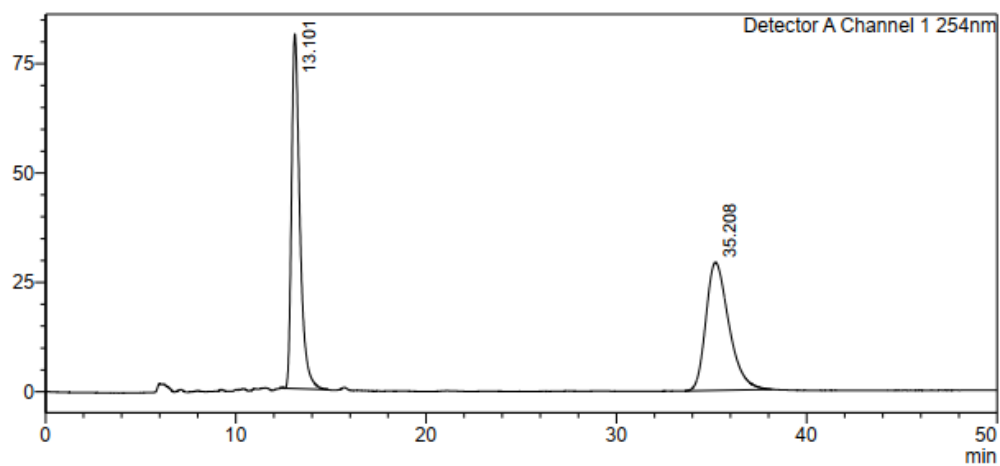

| Peak# | Ret. Time | Area    | Height | Area%   | Height% |
|-------|-----------|---------|--------|---------|---------|
| 1     | 13.101    | 2462164 | 81019  | 50.045  | 73.462  |
| 2     | 35.208    | 2457780 | 29268  | 49.955  | 26.538  |
| Total |           | 4919944 | 110287 | 100.000 | 100.000 |

<Chromatogram>

mV

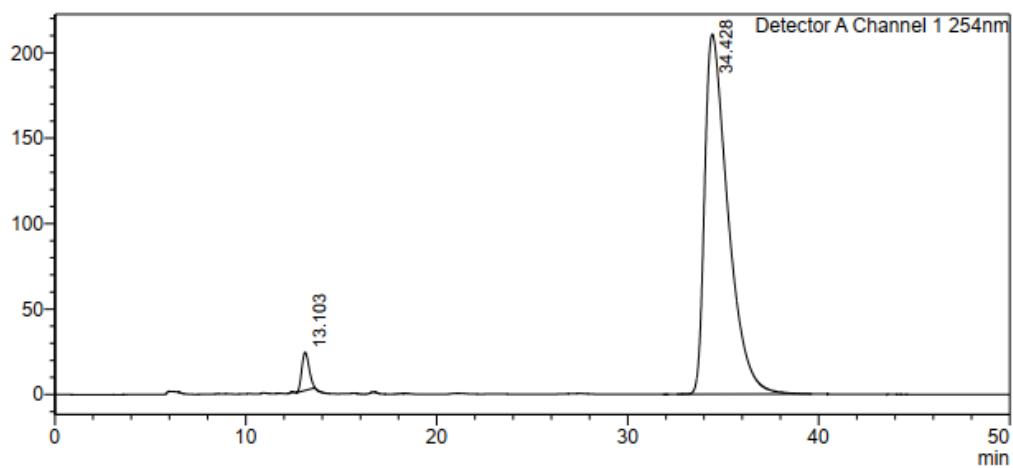

| Peak# | Ret. Time | Area     | Height | Area%   | Height% |
|-------|-----------|----------|--------|---------|---------|
| 1     | 13.103    | 594538   | 22332  | 3.220   | 9.591   |
| 2     | 34.428    | 17871988 | 210514 | 96.780  | 90.409  |
| Total |           | 18466525 | 232847 | 100.000 | 100.000 |

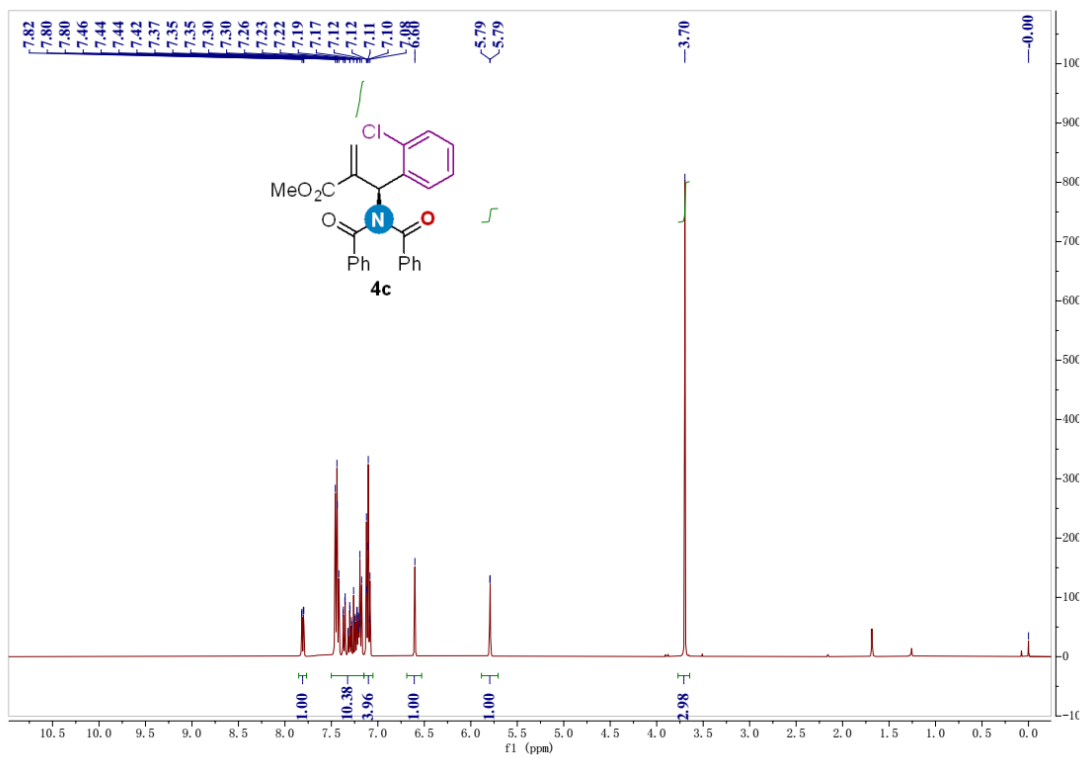

$^1\text{H}$  NMR spectrum of **4c** (400 MHz,  $\text{CDCl}_3$ )

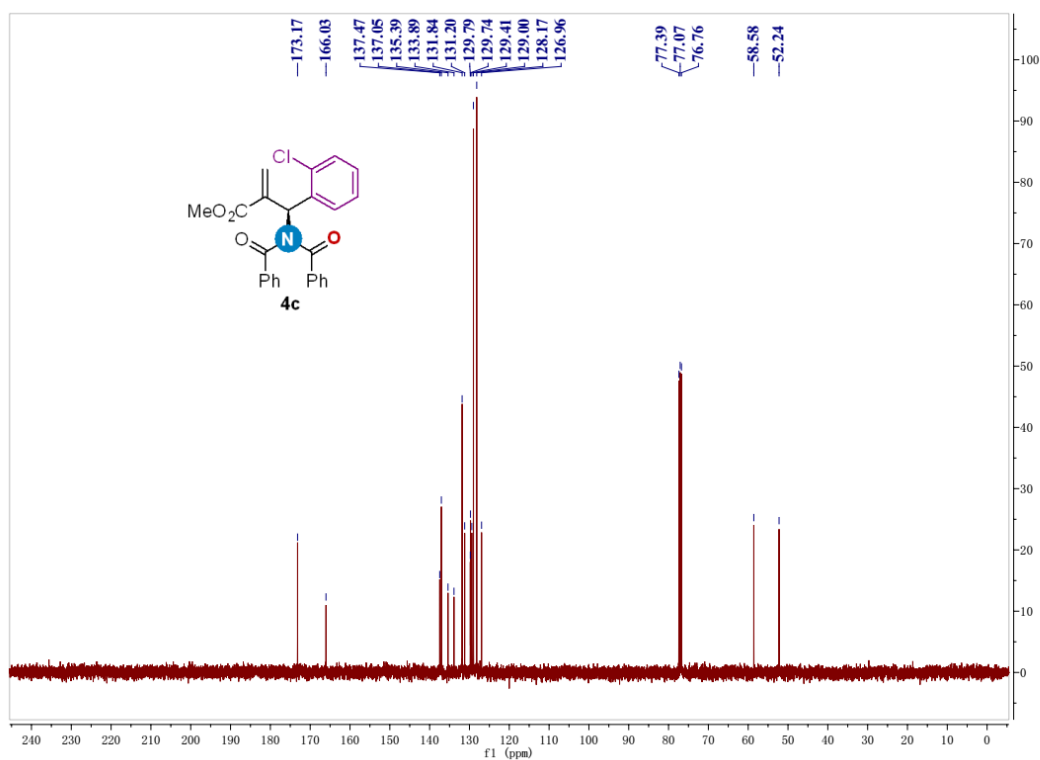

$^{13}\text{C}$  NMR spectrum of **4c** (100 MHz,  $\text{CDCl}_3$ )

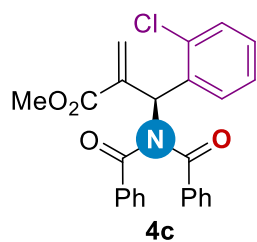

**<Chromatogram>**

mV

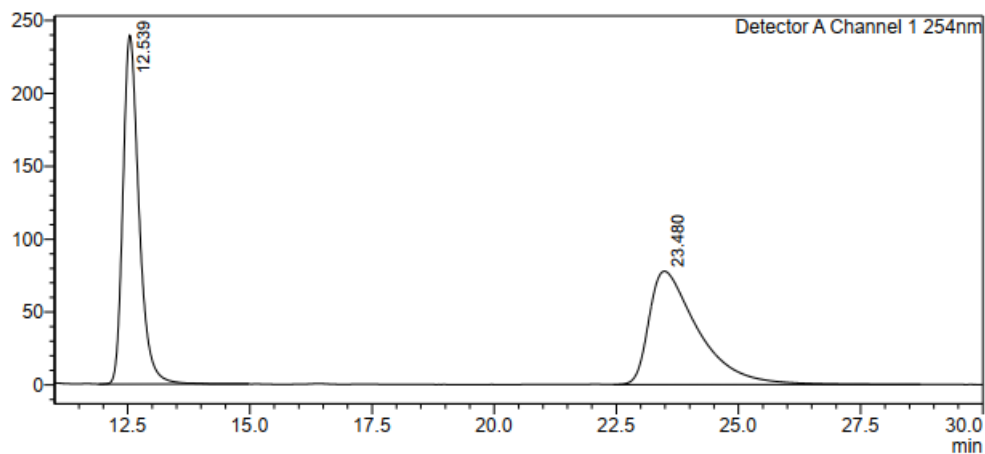

| Peak# | Ret. Time | Area     | Height | Area%   | Height% |
|-------|-----------|----------|--------|---------|---------|
| 1     | 12.539    | 5462502  | 239173 | 50.143  | 75.473  |
| 2     | 23.480    | 5431377  | 77726  | 49.857  | 24.527  |
| Total |           | 10893880 | 316898 | 100.000 | 100.000 |

**<Chromatogram>**

mV

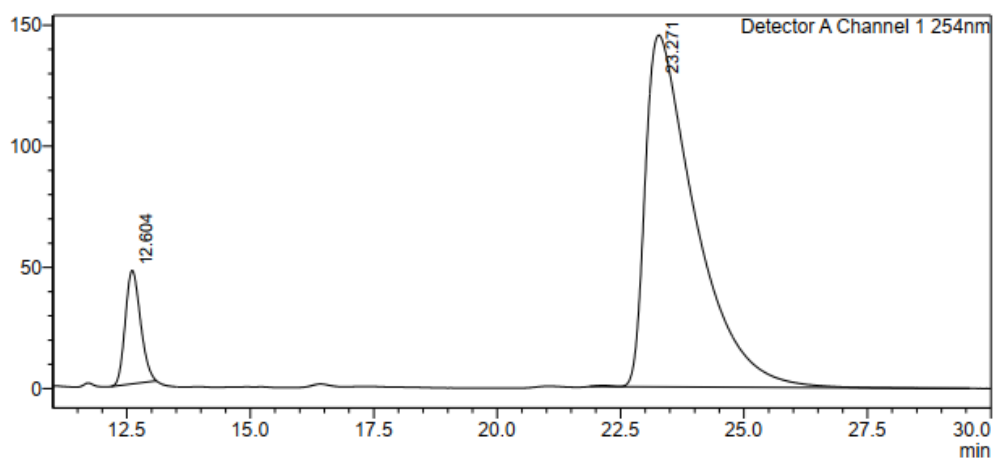

| Peak# | Ret. Time | Area     | Height | Area%   | Height% |
|-------|-----------|----------|--------|---------|---------|
| 1     | 12.604    | 1007948  | 46860  | 8.982   | 24.395  |
| 2     | 23.271    | 10213817 | 145228 | 91.018  | 75.605  |
| Total |           | 11221765 | 192088 | 100.000 | 100.000 |



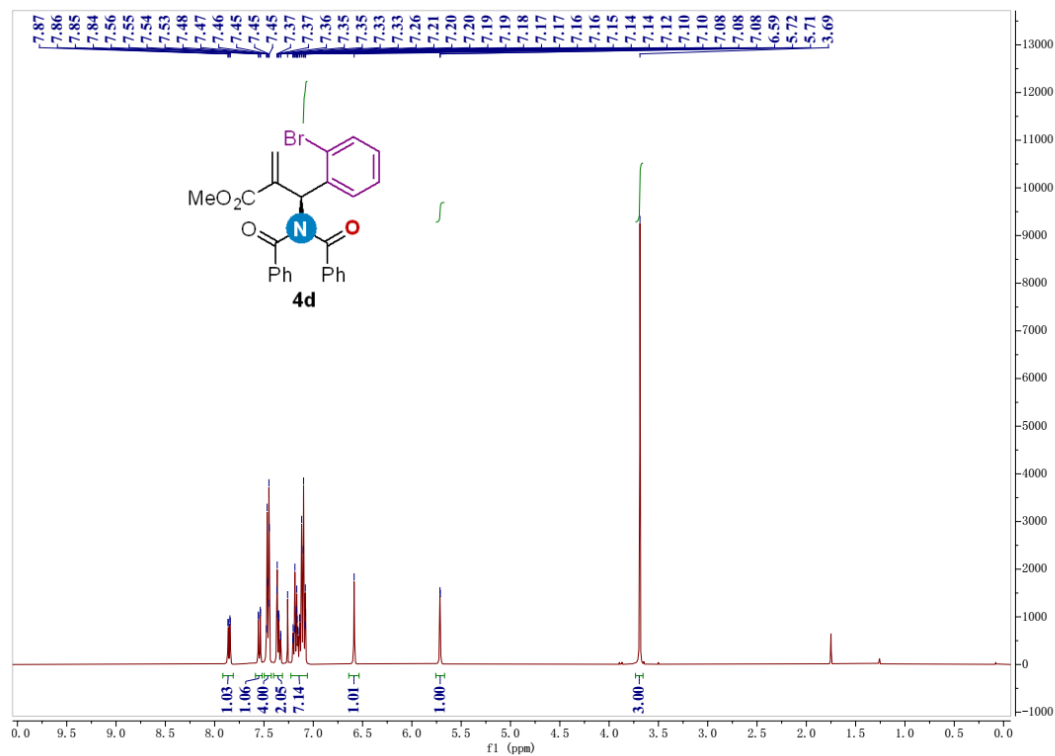

$^1\text{H}$  NMR spectrum of **4d** (400 MHz,  $\text{CDCl}_3$ )

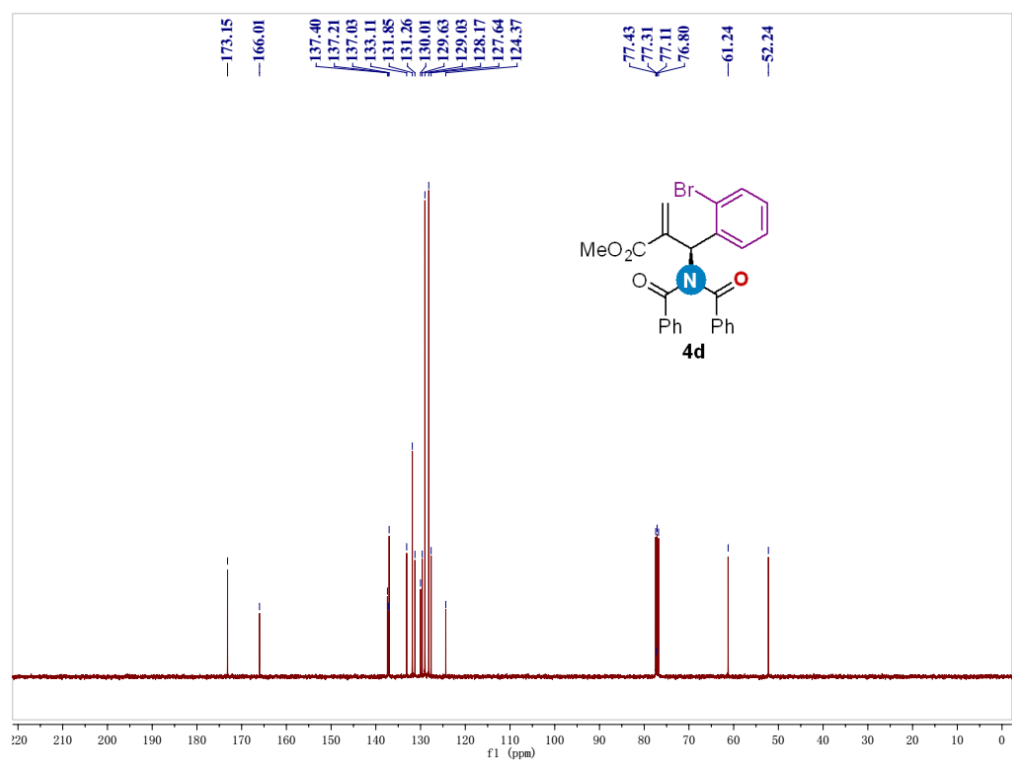

$^{13}\text{C}$  NMR spectrum of **4d** (100 MHz,  $\text{CDCl}_3$ )

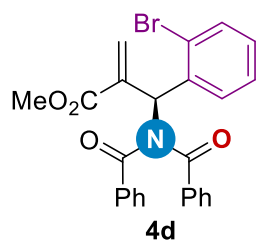

**<Chromatogram>**

mV

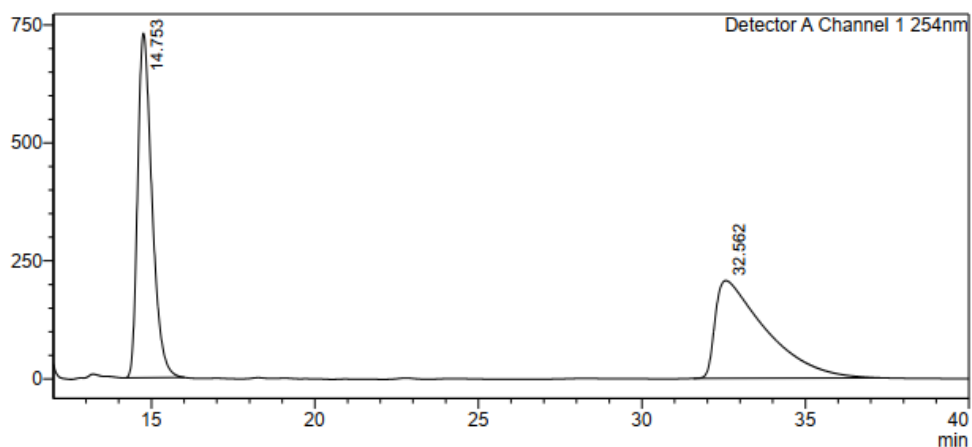

| Peak# | Ret. Time | Area     | Height | Area%   | Height% |
|-------|-----------|----------|--------|---------|---------|
| 1     | 14.753    | 22242144 | 729834 | 50.069  | 77.901  |
| 2     | 32.562    | 22180536 | 207037 | 49.931  | 22.099  |
| Total |           | 44422680 | 936871 | 100.000 | 100.000 |

**<Chromatogram>**

mV

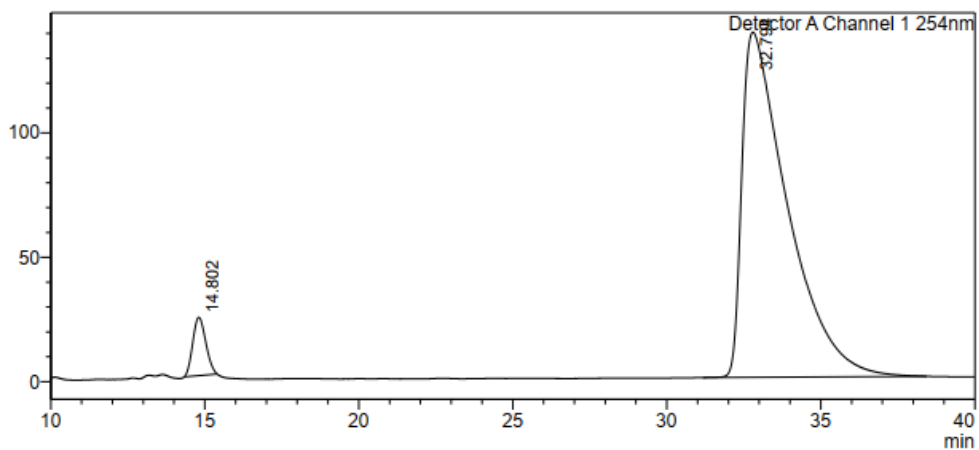

| Peak# | Ret. Time | Area     | Height | Area%   | Height% |
|-------|-----------|----------|--------|---------|---------|
| 1     | 14.802    | 693570   | 23449  | 4.631   | 14.456  |
| 2     | 32.794    | 14281945 | 138762 | 95.369  | 85.544  |
| Total |           | 14975515 | 162211 | 100.000 | 100.000 |

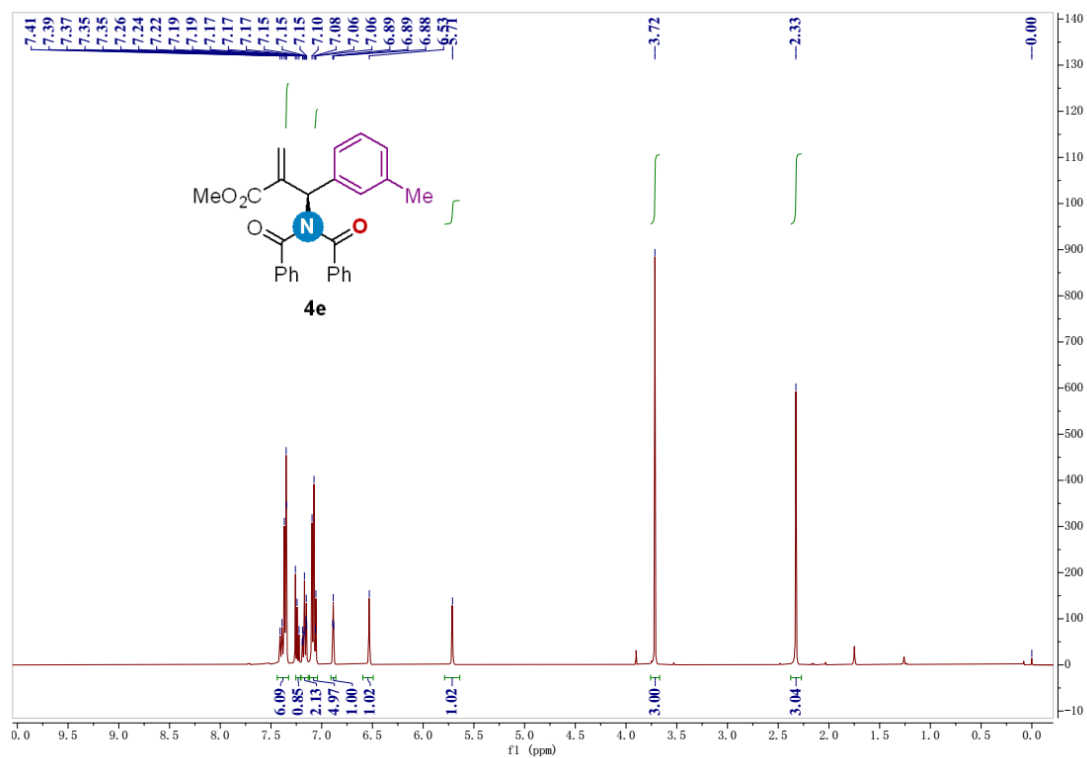

$^1\text{H}$  NMR spectrum of **4e** (400 MHz,  $\text{CDCl}_3$ )

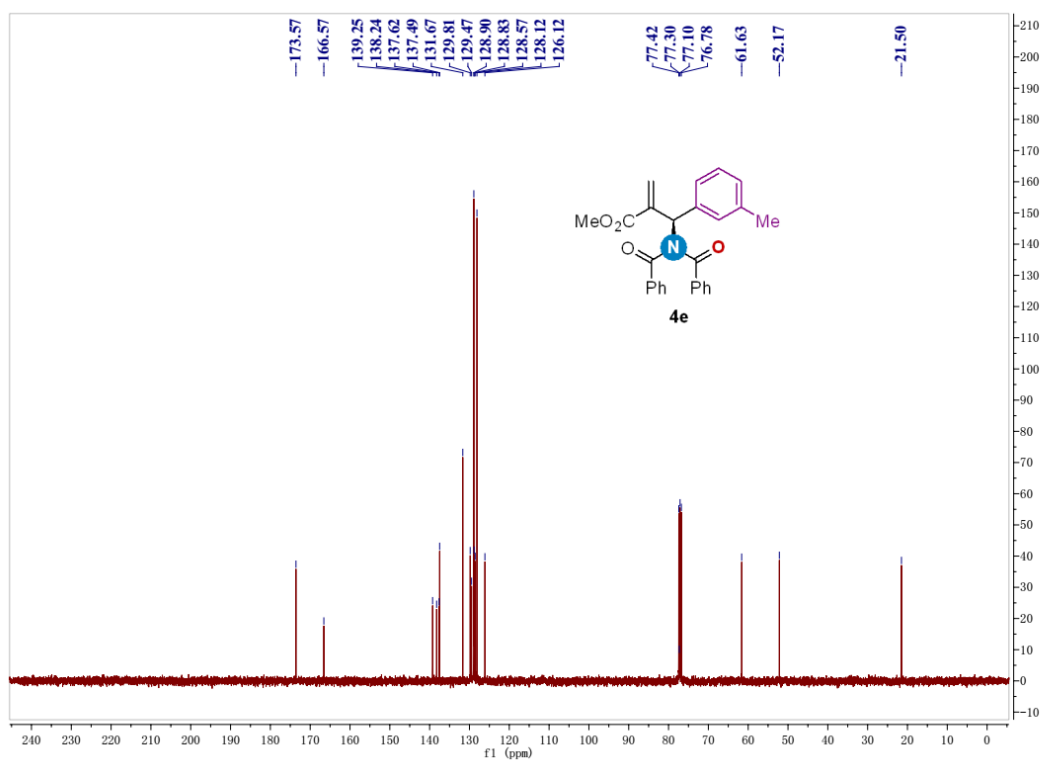

$^{13}\text{C}$  NMR spectrum of **4e** (100 MHz,  $\text{CDCl}_3$ )

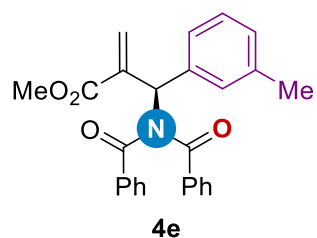

**<Chromatogram>**

mV

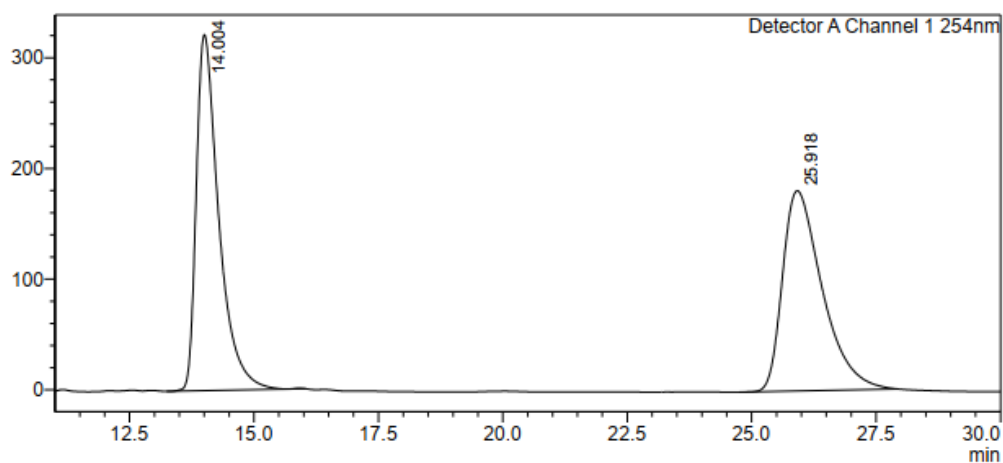

| Peak# | Ret. Time | Area     | Height | Area%   | Height% |
|-------|-----------|----------|--------|---------|---------|
| 1     | 14.004    | 10131474 | 321399 | 50.234  | 63.987  |
| 2     | 25.918    | 10037171 | 180893 | 49.766  | 36.013  |
| Total |           | 20168645 | 502292 | 100.000 | 100.000 |

**<Chromatogram>**

mV

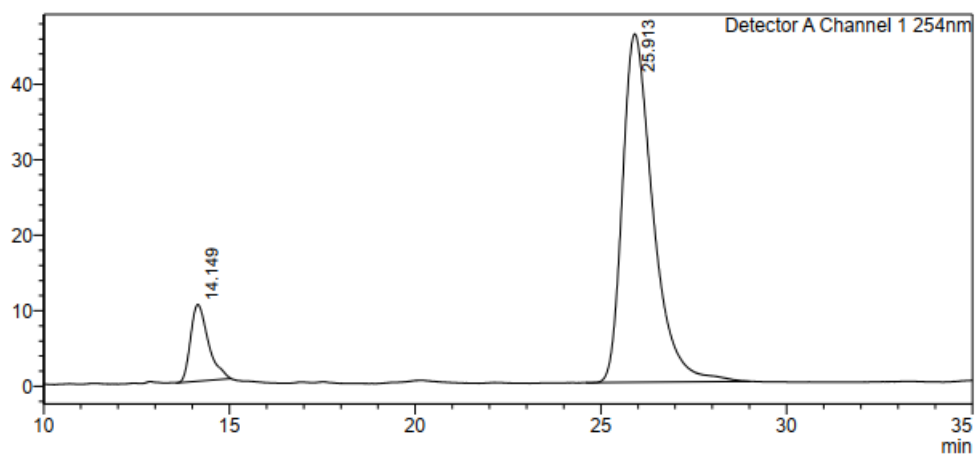

| Peak# | Ret. Time | Area    | Height | Area%   | Height% |
|-------|-----------|---------|--------|---------|---------|
| 1     | 14.149    | 337000  | 10134  | 11.312  | 18.009  |
| 2     | 25.913    | 2642041 | 46135  | 88.688  | 81.991  |
| Total |           | 2979041 | 56268  | 100.000 | 100.000 |

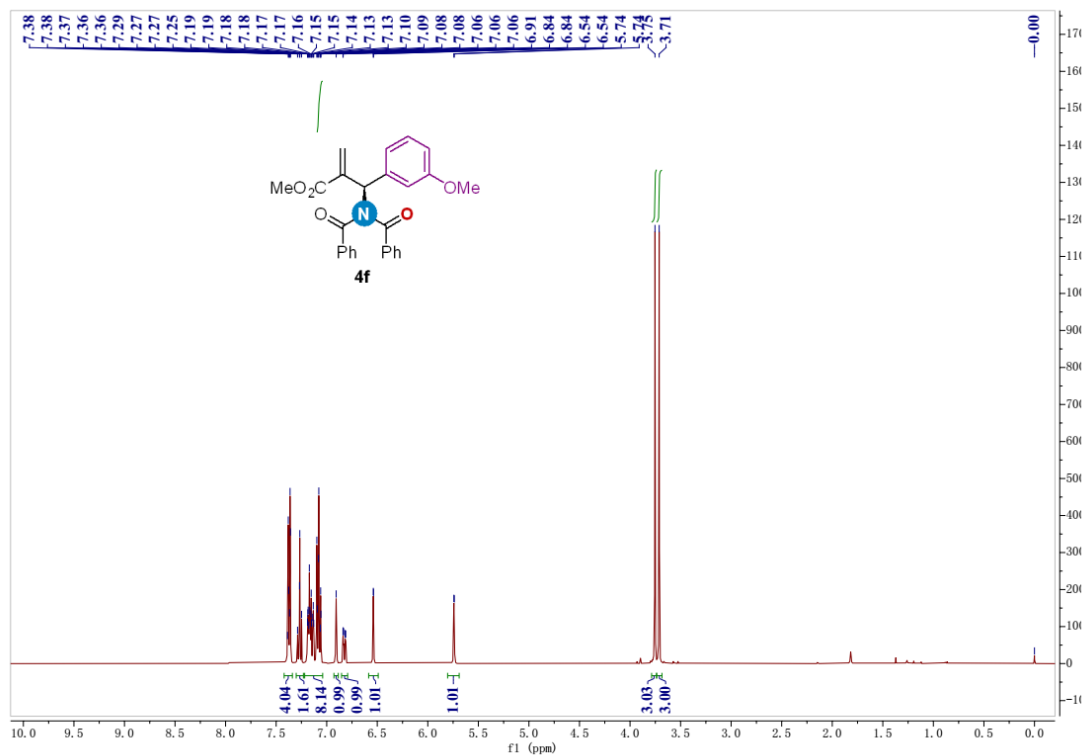

<sup>1</sup>H NMR spectrum of **4f** (400 MHz, CDCl<sub>3</sub>)

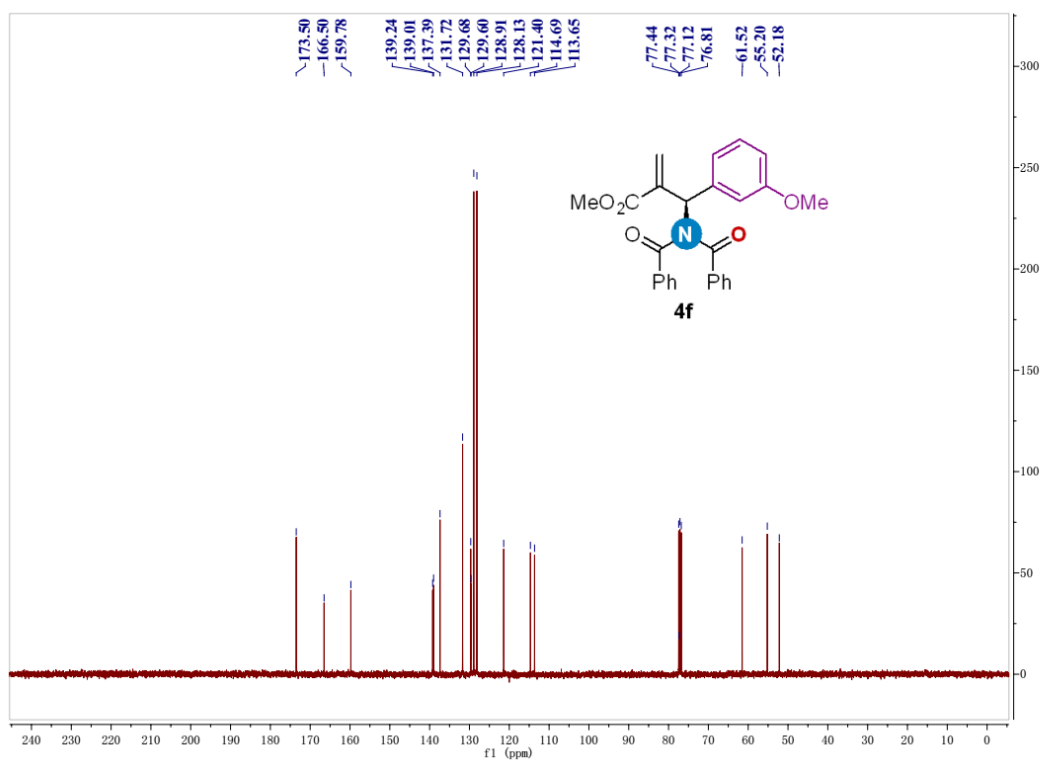

<sup>13</sup>C NMR spectrum of **4f** (100 MHz, CDCl<sub>3</sub>)

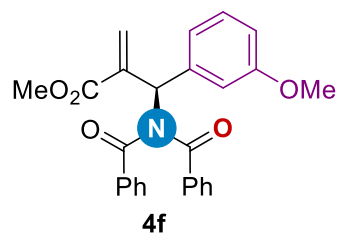

**<Chromatogram>**

mV

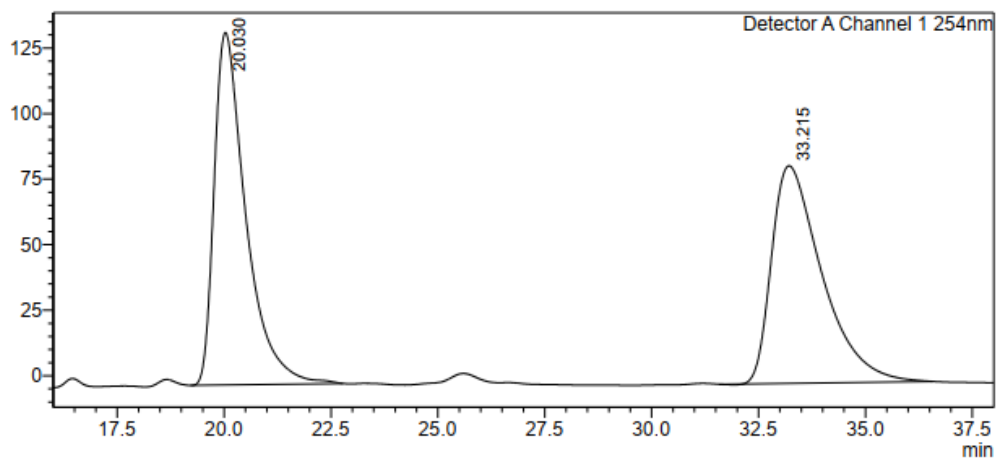

| Peak# | Ret. Time | Area     | Height | Area%   | Height% |
|-------|-----------|----------|--------|---------|---------|
| 1     | 20.030    | 6929434  | 134414 | 50.498  | 61.827  |
| 2     | 33.215    | 6792655  | 82989  | 49.502  | 38.173  |
| Total |           | 13722089 | 217404 | 100.000 | 100.000 |

**<Chromatogram>**

mV

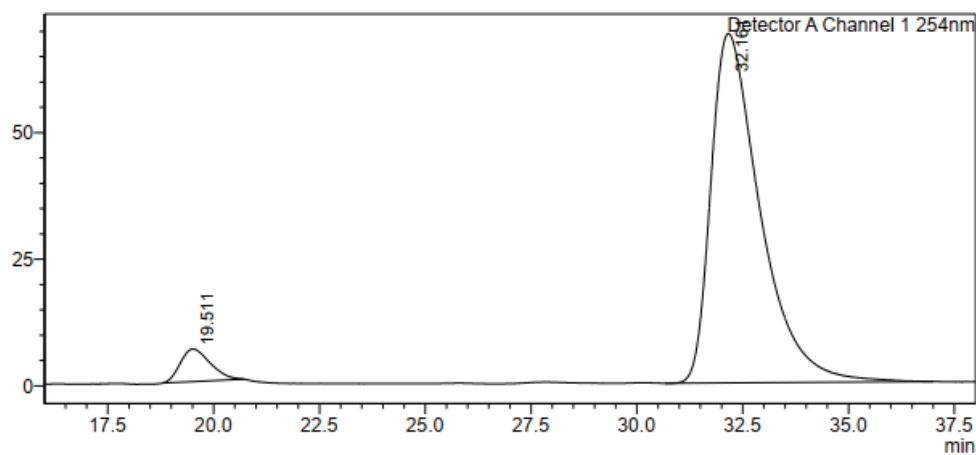

| Peak# | Ret. Time | Area    | Height | Area%   | Height% |
|-------|-----------|---------|--------|---------|---------|
| 1     | 19.511    | 316898  | 6439   | 5.359   | 8.535   |
| 2     | 32.161    | 5596122 | 69006  | 94.641  | 91.465  |
| Total |           | 5913020 | 75445  | 100.000 | 100.000 |

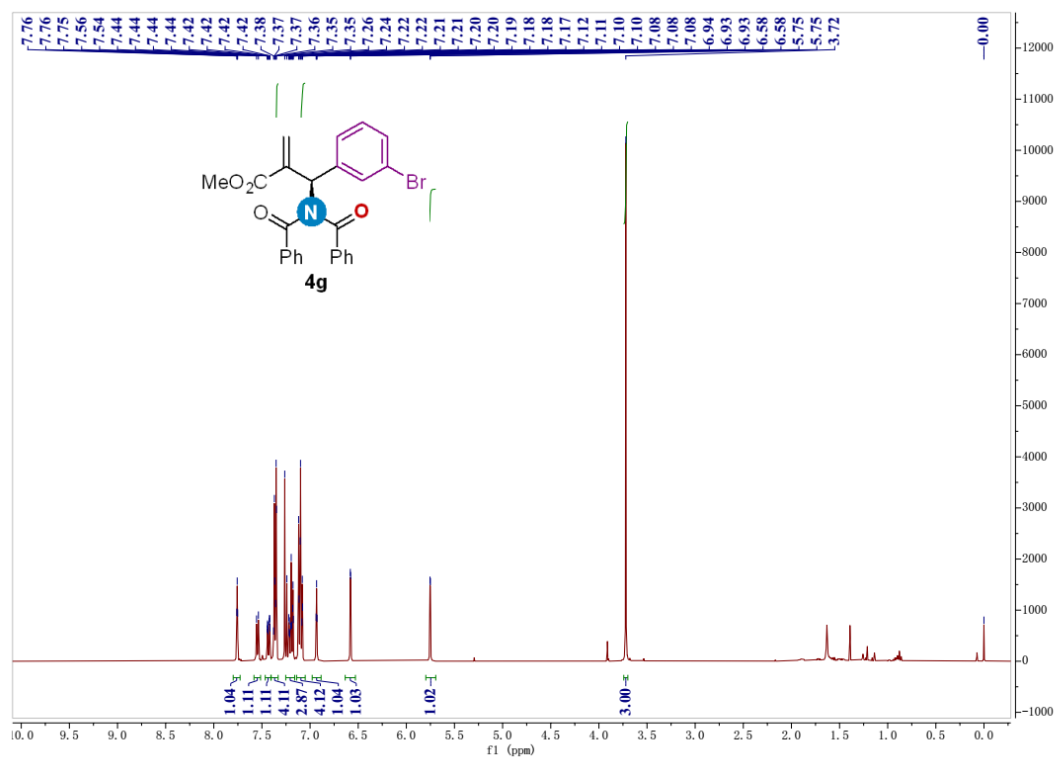

<sup>1</sup>H NMR spectrum of **4g** (400 MHz, CDCl<sub>3</sub>)

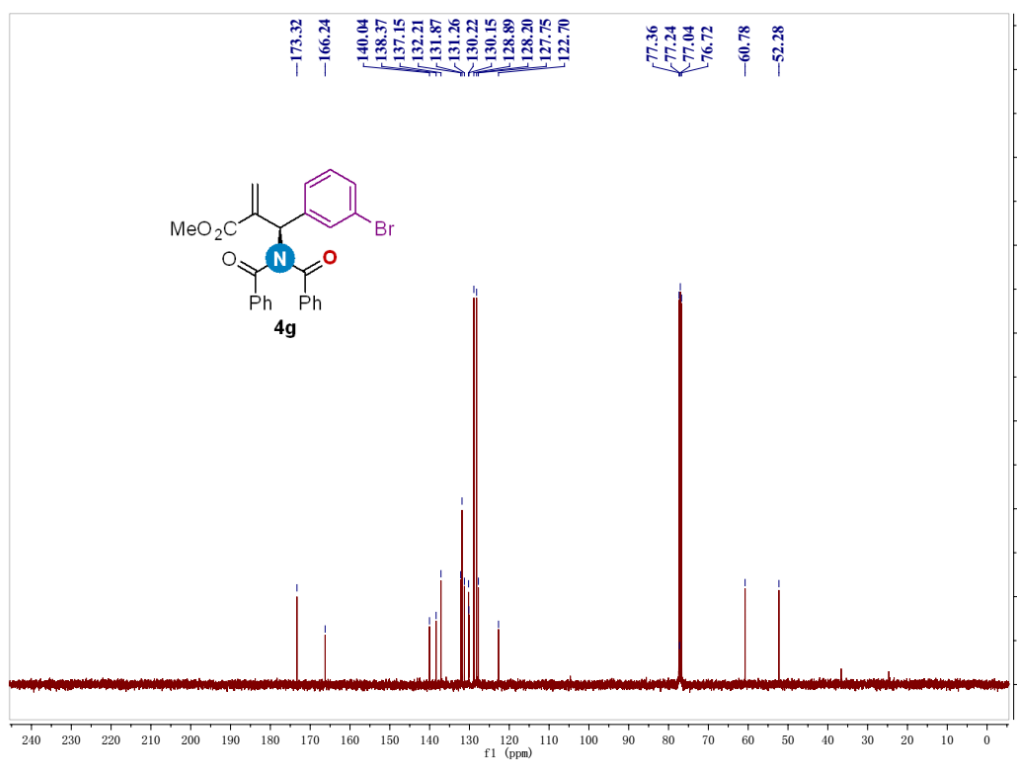

<sup>13</sup>C NMR spectrum of **4g** (100 MHz, CDCl<sub>3</sub>)

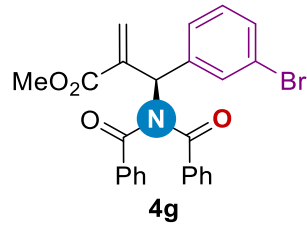

**<Chromatogram>**

mV

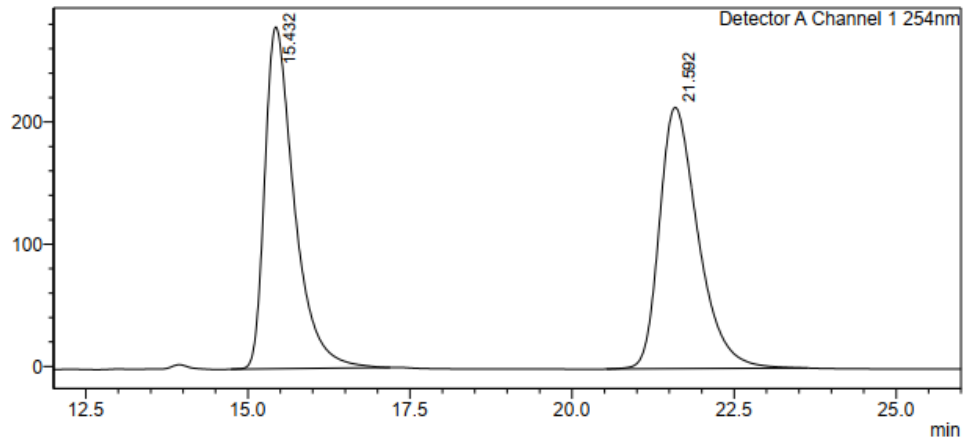

| Peak# | Ret. Time | Area     | Height | Area%   | Height% |
|-------|-----------|----------|--------|---------|---------|
| 1     | 15.432    | 8856006  | 279518 | 49.904  | 56.655  |
| 2     | 21.592    | 8890080  | 213850 | 50.096  | 43.345  |
| Total |           | 17746086 | 493368 | 100.000 | 100.000 |

**<Chromatogram>**

mV

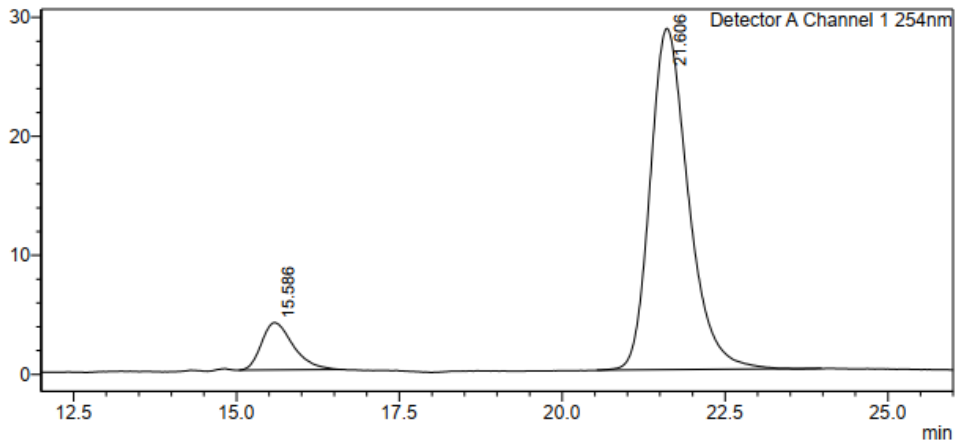

| Peak# | Ret. Time | Area    | Height | Area%   | Height% |
|-------|-----------|---------|--------|---------|---------|
| 1     | 15.586    | 134825  | 39/8   | 10.313  | 12.183  |
| 2     | 21.606    | 1172525 | 28677  | 89.687  | 87.817  |
| Total |           | 1307350 | 32655  | 100.000 | 100.000 |



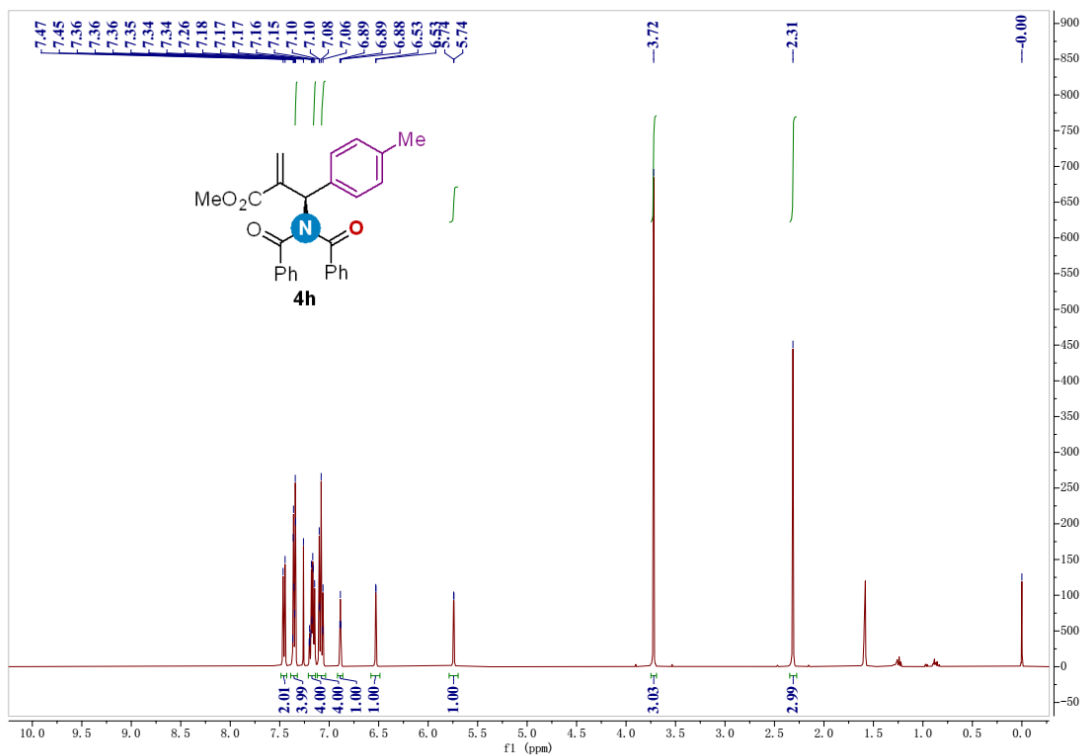

<sup>1</sup>H NMR spectrum of **4h** (400 MHz, CDCl<sub>3</sub>)

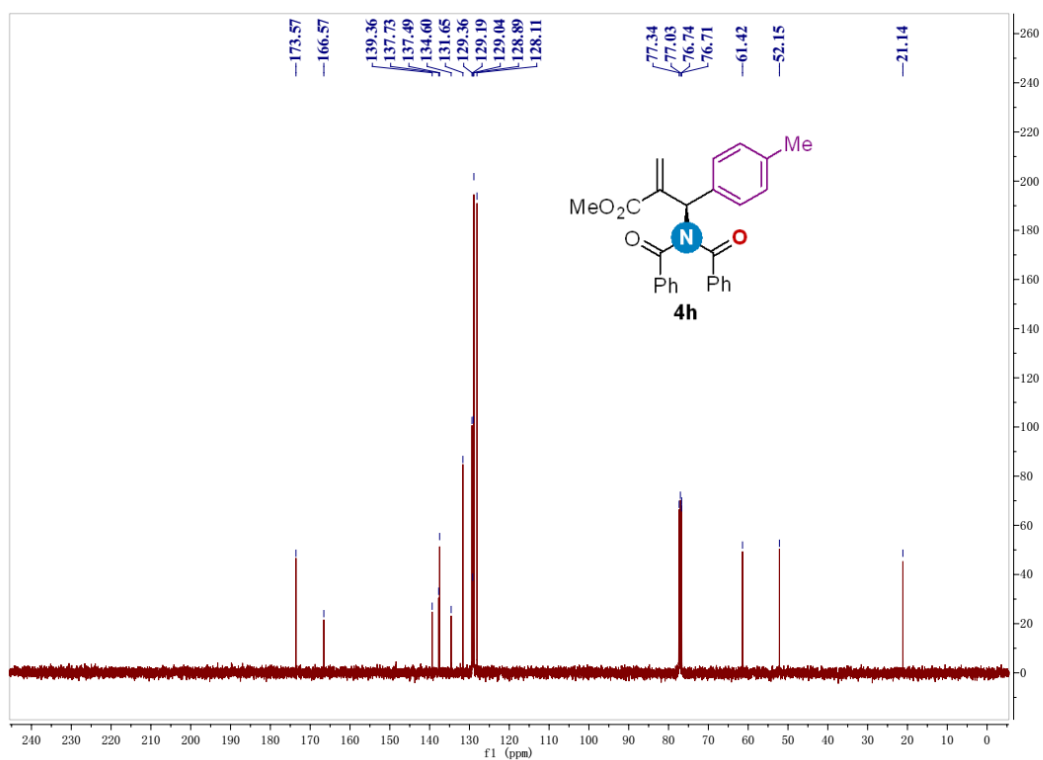

<sup>13</sup>C NMR spectrum of **4h** (100 MHz, CDCl<sub>3</sub>)

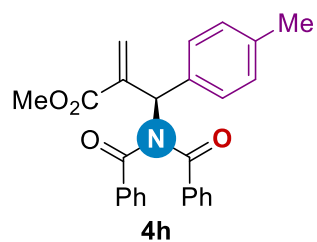

**<Chromatogram>**

mV

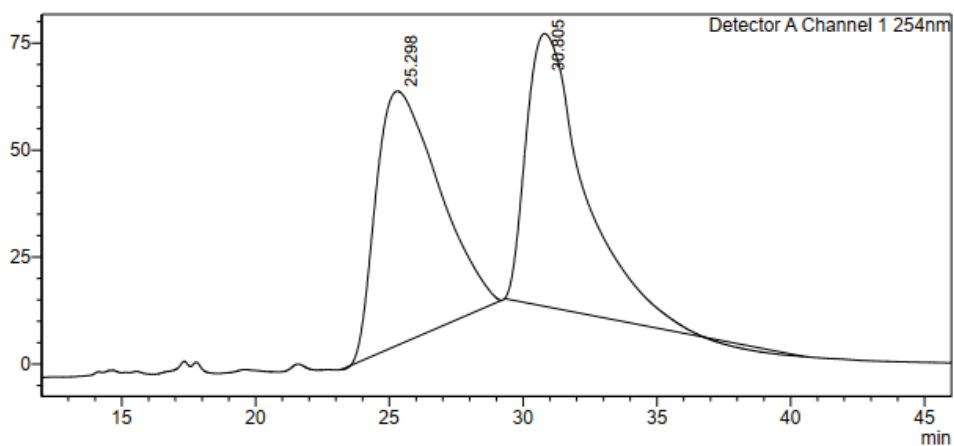

| Peak# | Ret. Time | Area     | Height | Area%   | Height% |
|-------|-----------|----------|--------|---------|---------|
| 1     | 25.298    | 9702050  | 59401  | 50.183  | 48.245  |
| 2     | 30.805    | 9631349  | 63723  | 49.817  | 51.755  |
| Total |           | 19333399 | 123124 | 100.000 | 100.000 |

**<Chromatogram>**

mV

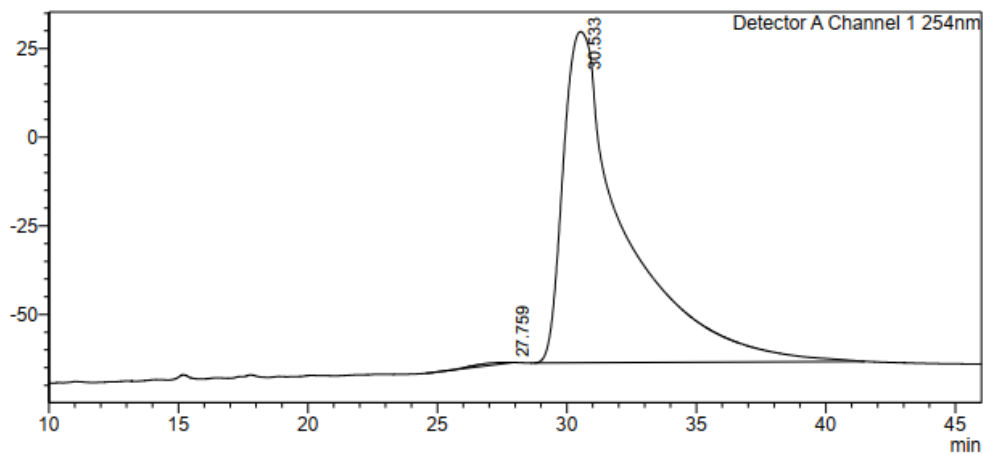

| Peak# | Ret. Time | Area     | Height | Area%   | Height% |
|-------|-----------|----------|--------|---------|---------|
| 1     | 27.759    | 55200    | 196    | 0.354   | 0.209   |
| 2     | 30.533    | 15532652 | 93412  | 99.646  | 99.791  |
| Total |           | 15587852 | 93608  | 100.000 | 100.000 |

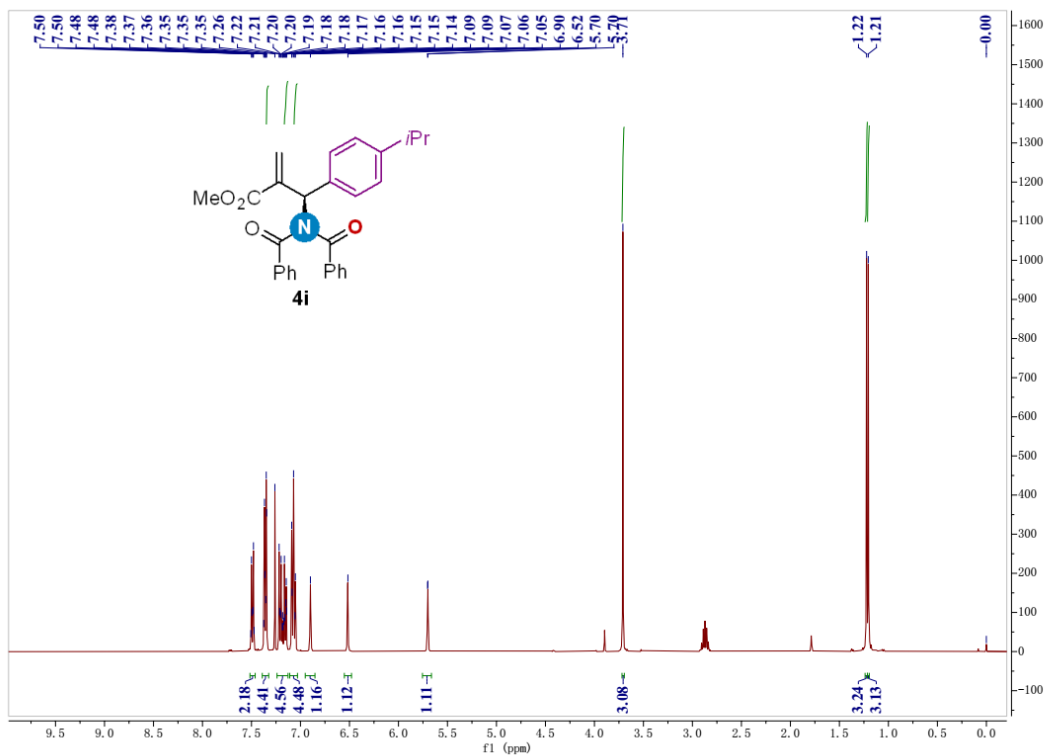

**<sup>1</sup>H NMR spectrum of **4i** (400 MHz, CDCl<sub>3</sub>)**

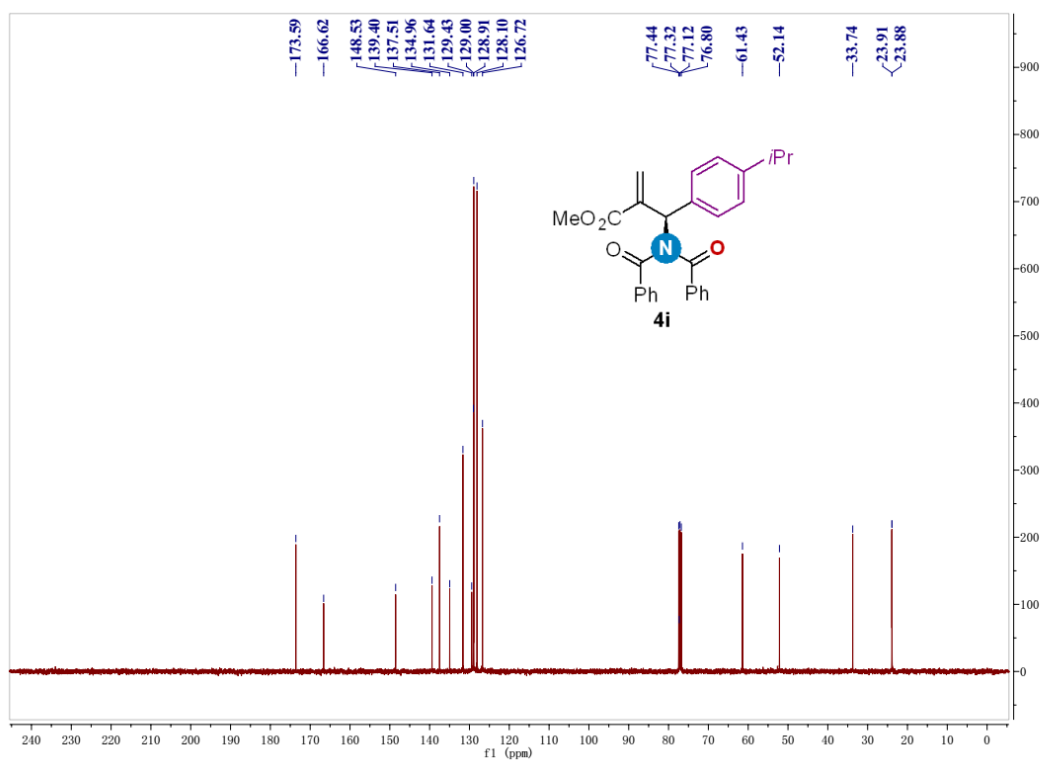

**<sup>13</sup>C NMR spectrum of **4i** (100 MHz, CDCl<sub>3</sub>)**

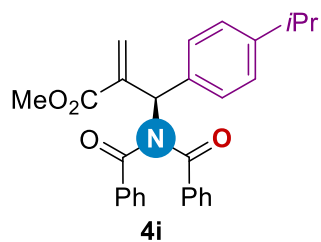

**<Chromatogram>**

mV

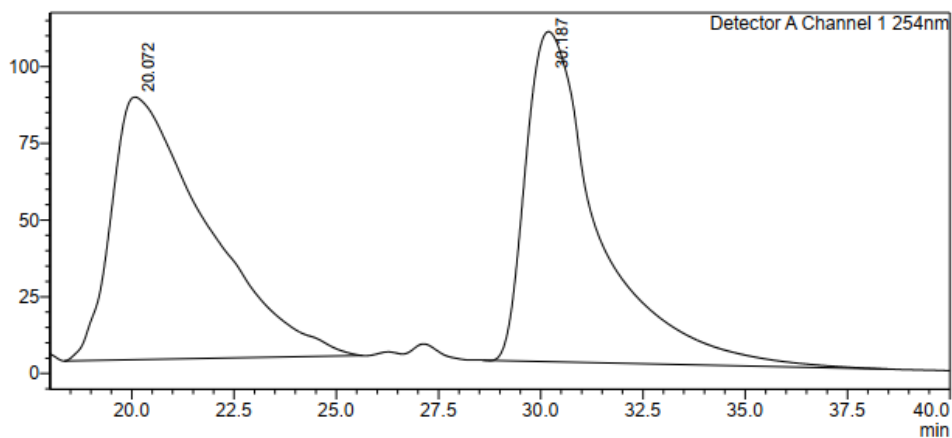

| Peak# | Ret. Time | Area     | Height | Area%   | Height% |
|-------|-----------|----------|--------|---------|---------|
| 1     | 20.072    | 14028211 | 85594  | 51.191  | 44.325  |
| 2     | 30.187    | 13375364 | 107512 | 48.809  | 55.675  |
| Total |           | 27403576 | 193106 | 100.000 | 100.000 |

**<Chromatogram>**

mV

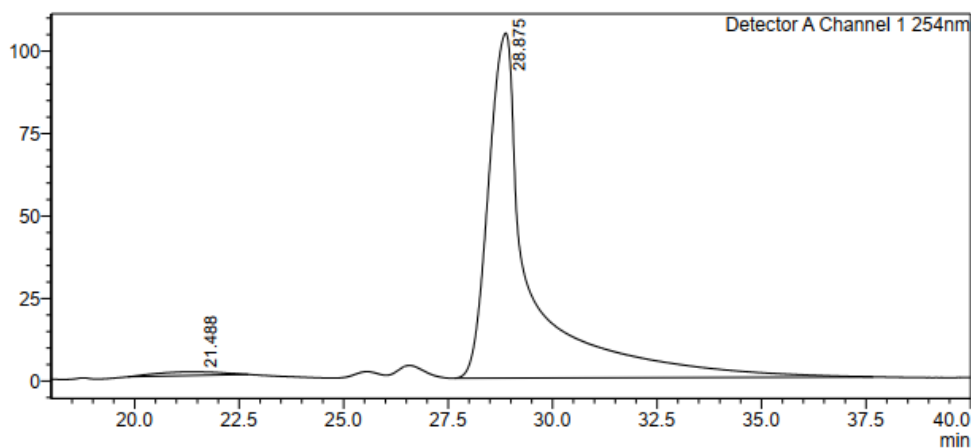

| Peak# | Ret. Time | Area    | Height | Area%   | Height% |
|-------|-----------|---------|--------|---------|---------|
| 1     | 21.488    | 124797  | 1106   | 1.648   | 1.047   |
| 2     | 28.875    | 7447024 | 104587 | 98.352  | 98.953  |
| Total |           | 7571821 | 105693 | 100.000 | 100.000 |

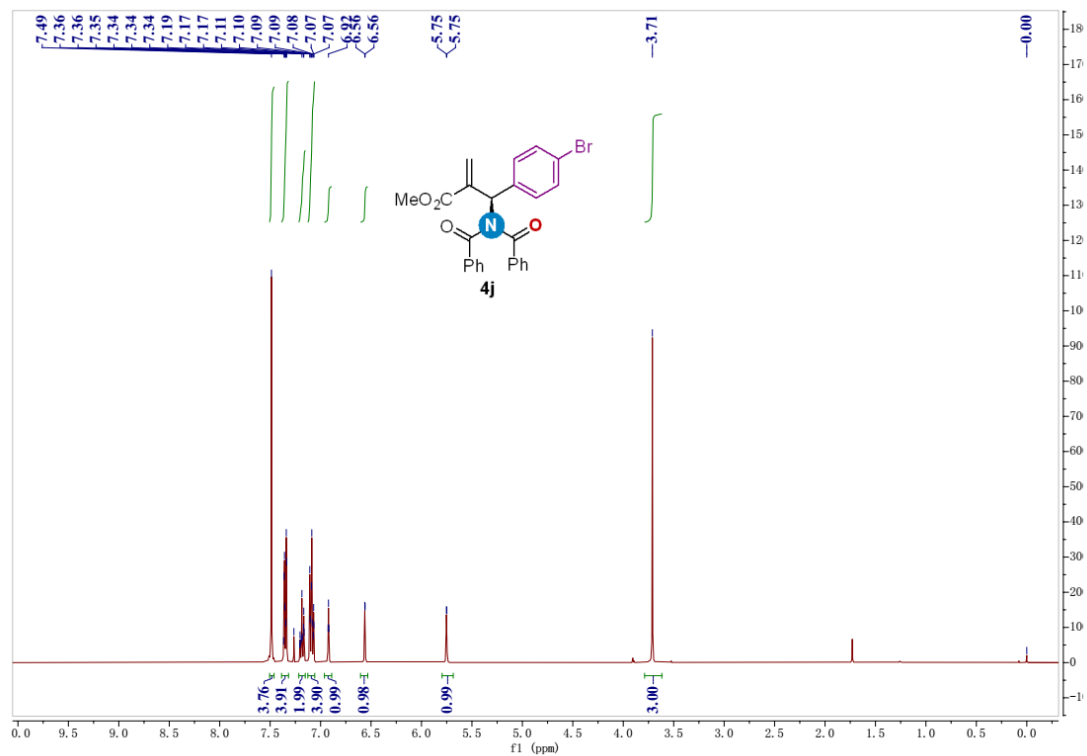

<sup>1</sup>H NMR spectrum of **4j** (400 MHz, CDCl<sub>3</sub>)

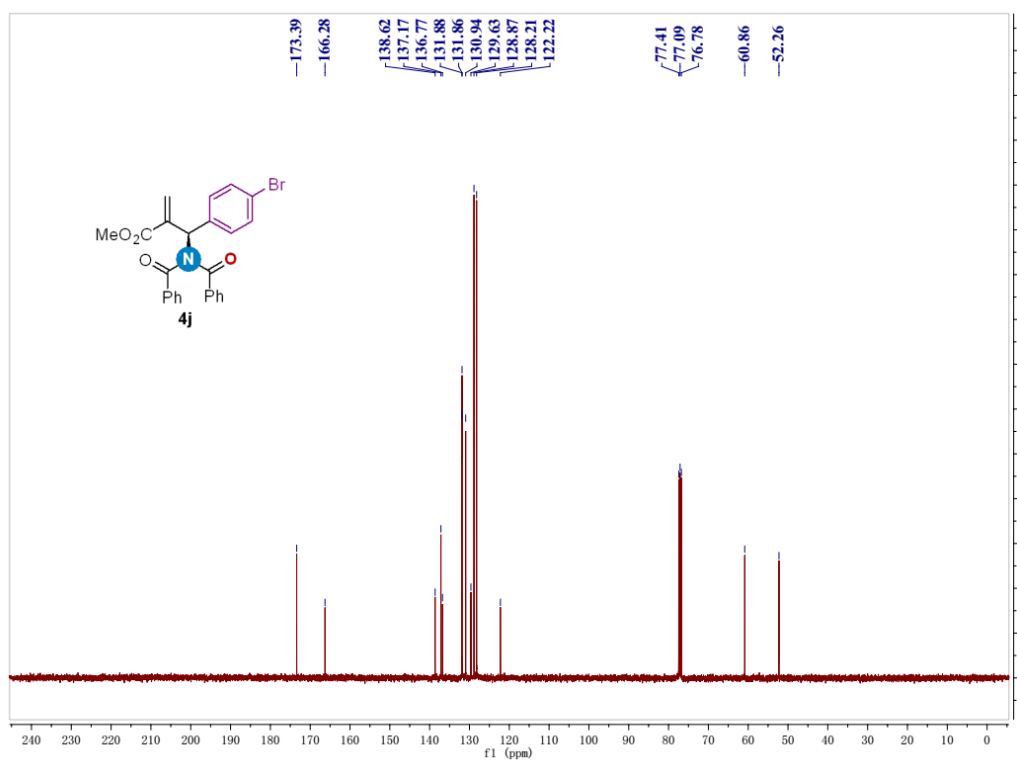

<sup>13</sup>C NMR spectrum of **4j** (100 MHz, CDCl<sub>3</sub>)

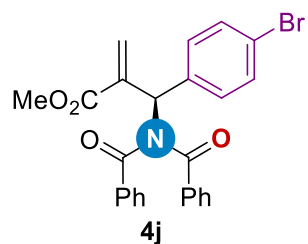

**<Chromatogram>**

mV

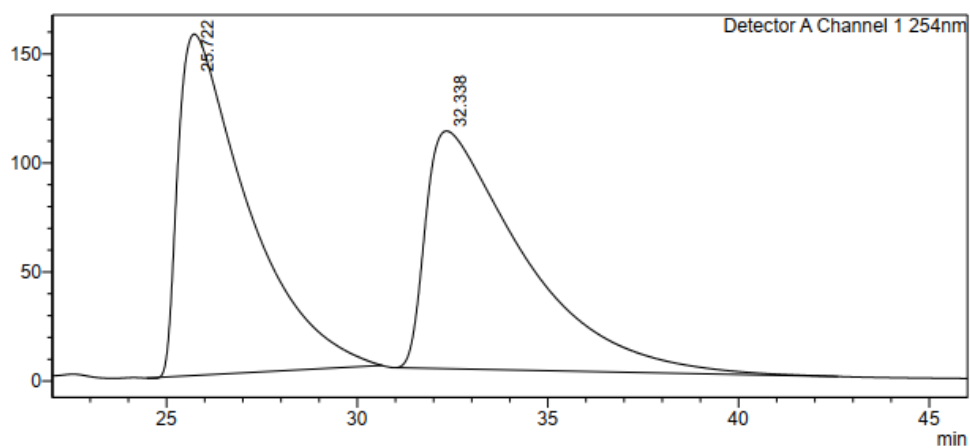

| Peak# | Ret. Time | Area     | Height | Area%   | Height% |
|-------|-----------|----------|--------|---------|---------|
| 1     | 25.722    | 19874500 | 156558 | 50.484  | 58.961  |
| 2     | 32.338    | 19493523 | 108972 | 49.516  | 41.039  |
| Total |           | 39368023 | 265530 | 100.000 | 100.000 |

**<Chromatogram>**

mV

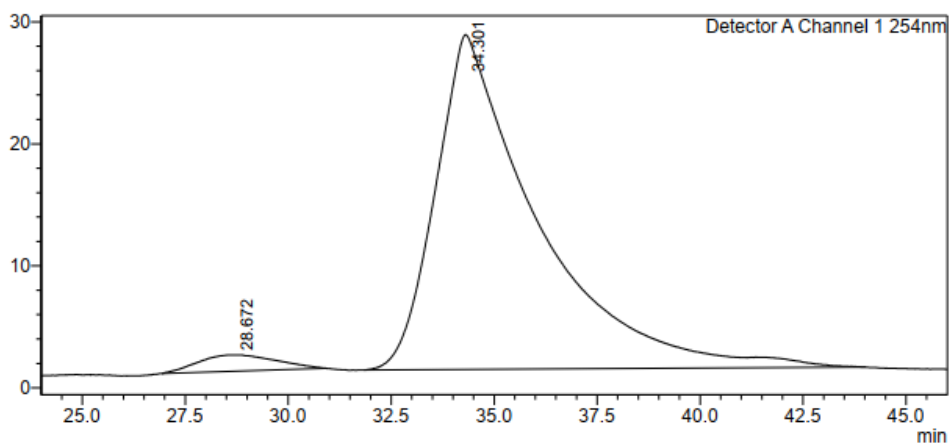

| Peak# | Ret. Time | Area    | Height | Area%   | Height% |
|-------|-----------|---------|--------|---------|---------|
| 1     | 28.672    | 174803  | 1336   | 3.578   | 4.643   |
| 2     | 34.301    | 4710292 | 27437  | 96.422  | 95.357  |
| Total |           | 4885095 | 28773  | 100.000 | 100.000 |

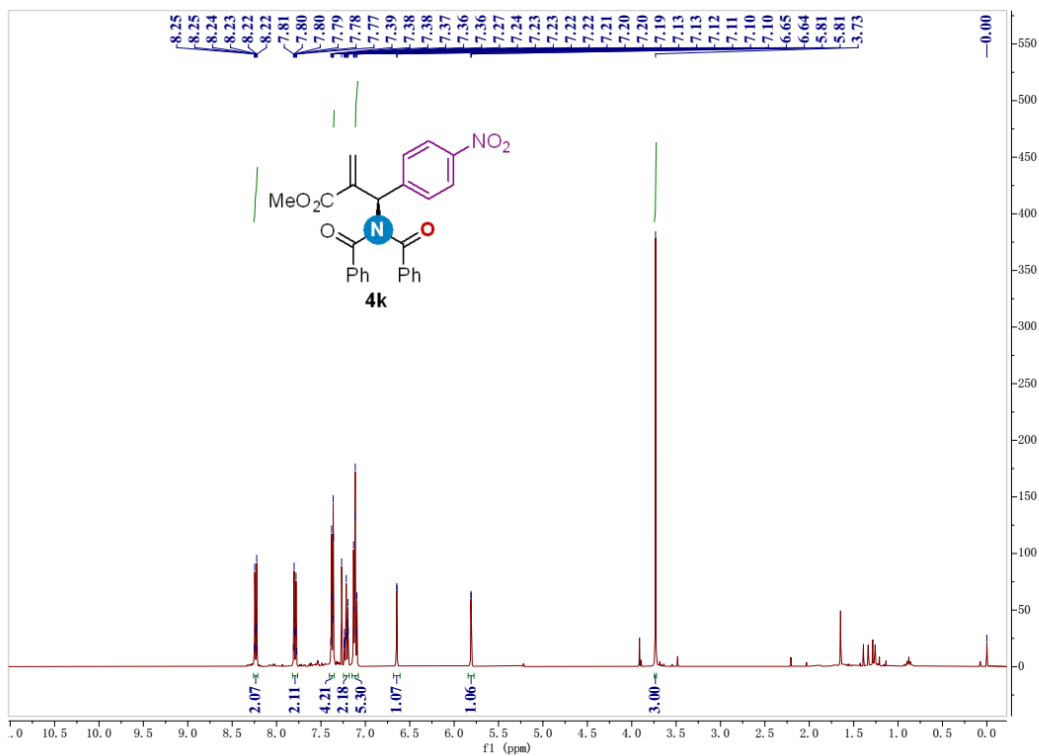

$^1\text{H}$  NMR spectrum of **4k** (400 MHz,  $\text{CDCl}_3$ )

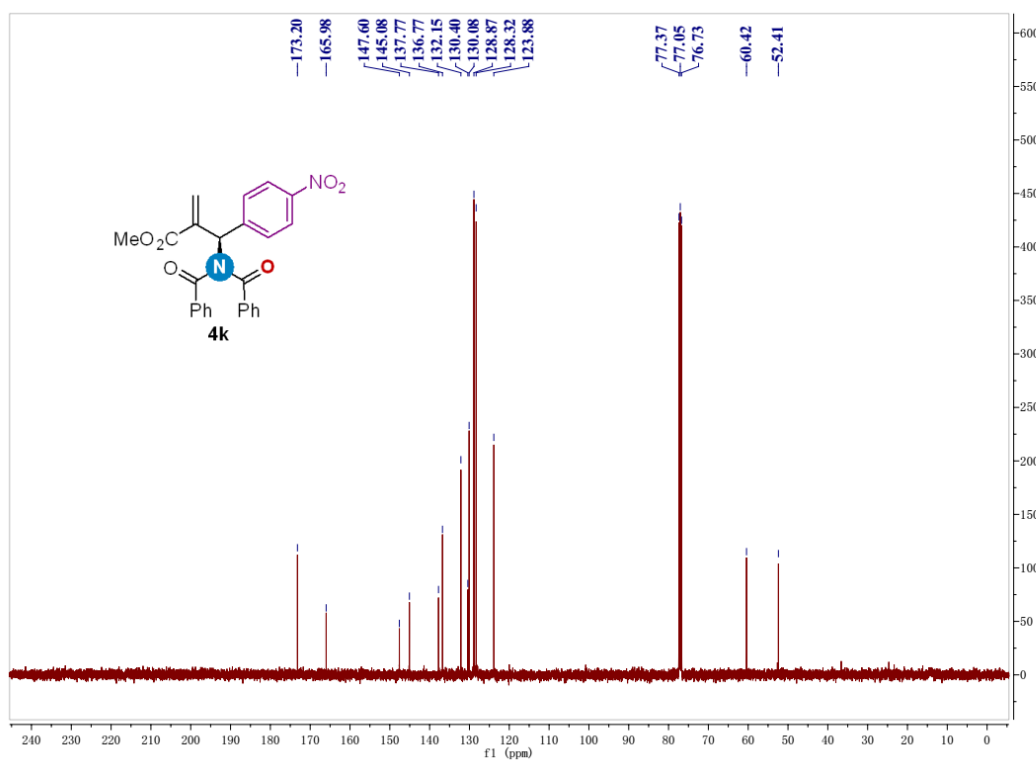

$^{13}\text{C}$  NMR spectrum of **4k** (100 MHz,  $\text{CDCl}_3$ )

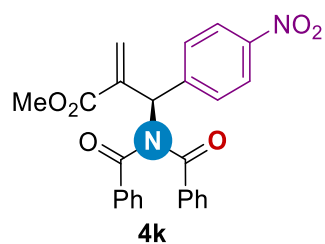

<Chromatogram>

mV

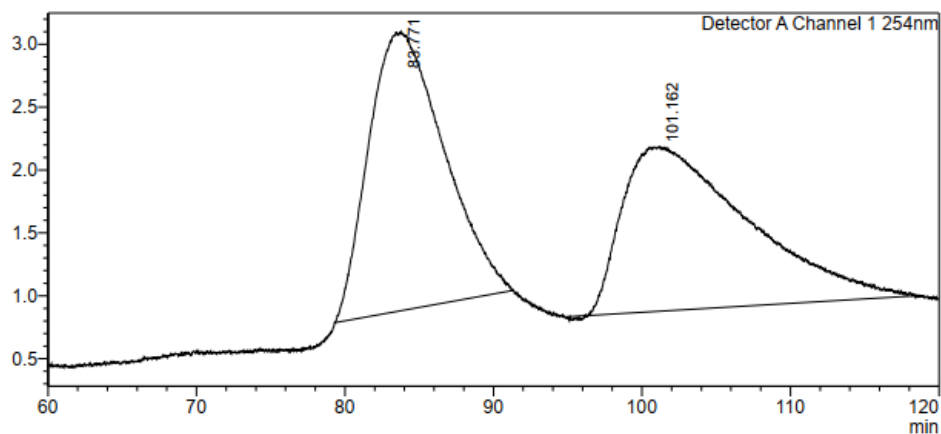

| Peak# | Ret. Time | Area    | Height | Area%   | Height% |
|-------|-----------|---------|--------|---------|---------|
| 1     | 83.771    | 781858  | 2217   | 50.440  | 62.855  |
| 2     | 101.162   | 768232  | 1310   | 49.560  | 37.145  |
| Total |           | 1550091 | 3527   | 100.000 | 100.000 |

<Chromatogram>

mV

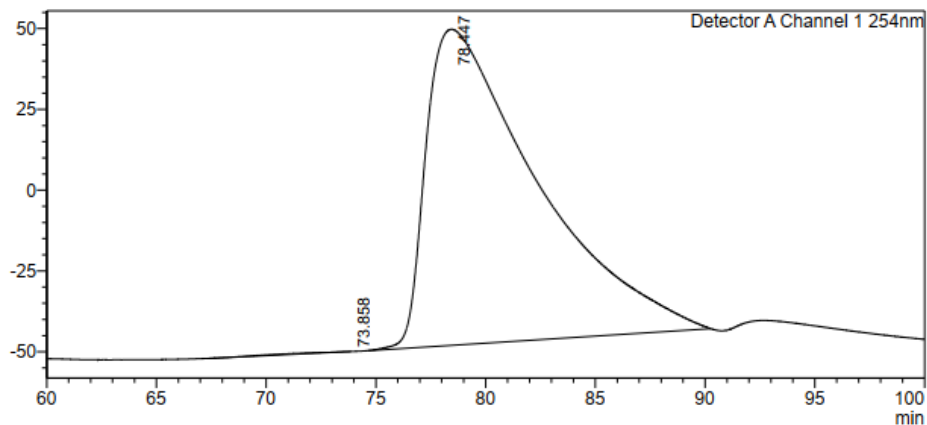

| Peak# | Ret. Time | Area     | Height | Area%   | Height% |
|-------|-----------|----------|--------|---------|---------|
| 1     | 73.858    | 51176    | 1      | 0.149   | 0.001   |
| 2     | 78.447    | 34283398 | 97786  | 99.851  | 99.999  |
| Total |           | 34334574 | 97787  | 100.000 | 100.000 |



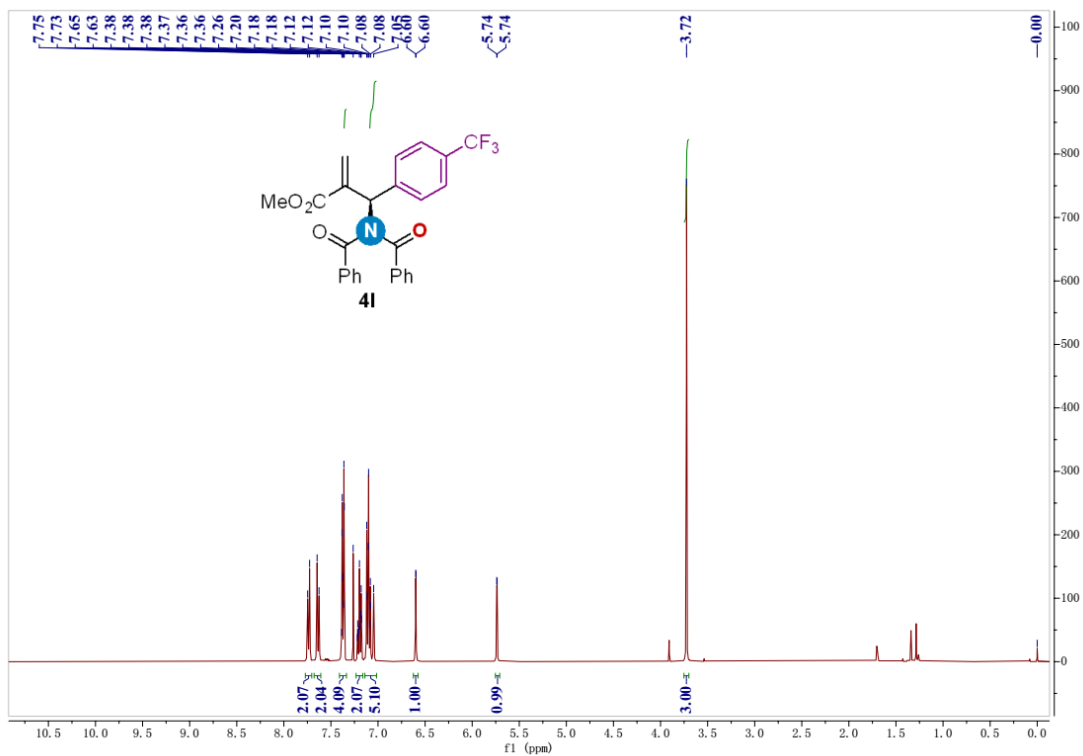

<sup>1</sup>H NMR spectrum of **4I** (400 MHz, CDCl<sub>3</sub>)

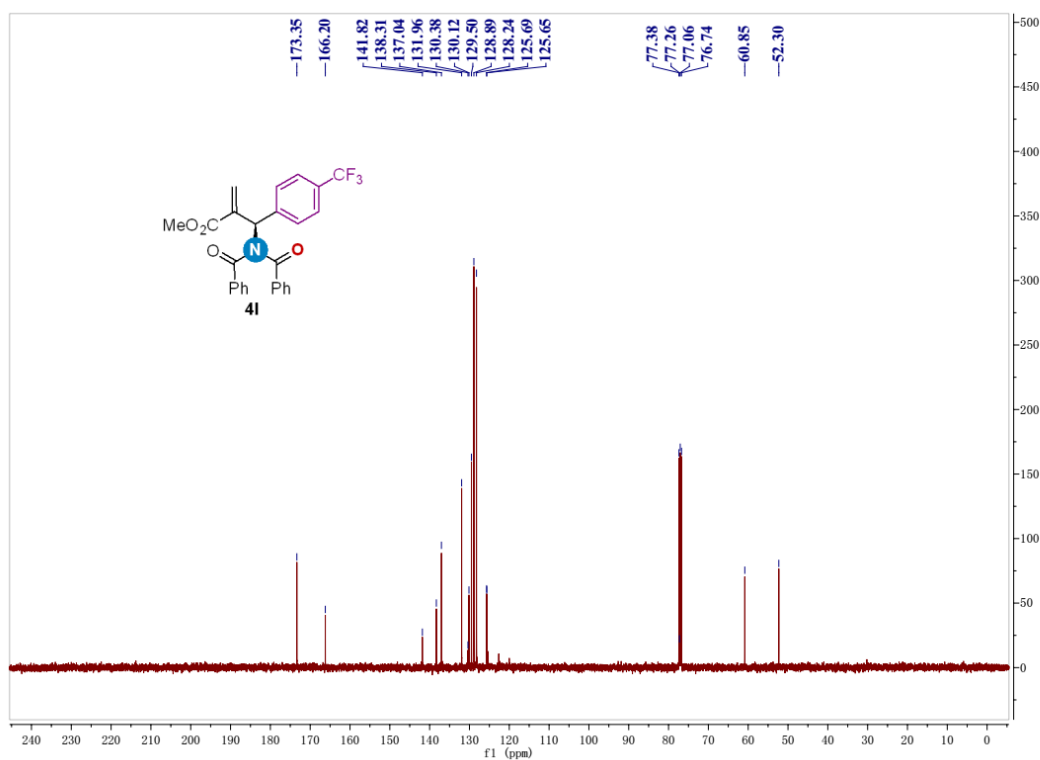

<sup>13</sup>C NMR spectrum of **4I** (100 MHz, CDCl<sub>3</sub>)

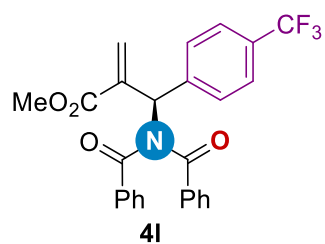

**<Chromatogram>**

mV

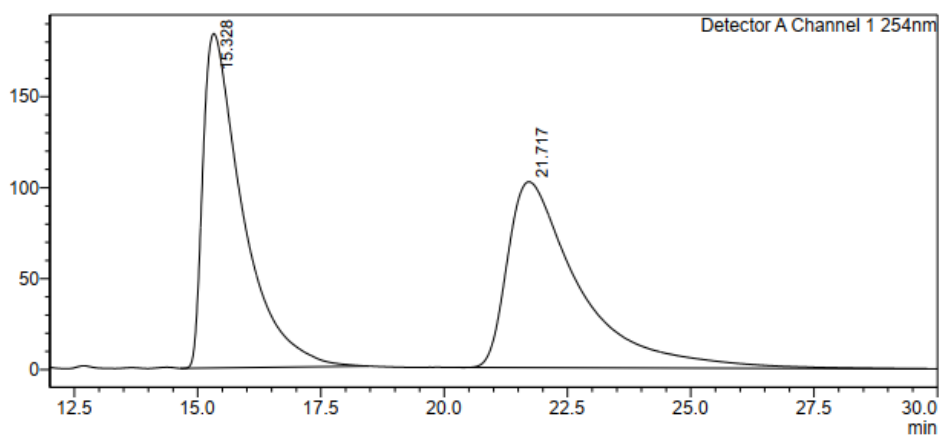

| Peak# | Ret. Time | Area     | Height | Area%   | Height% |
|-------|-----------|----------|--------|---------|---------|
| 1     | 15.328    | 10281638 | 183843 | 49.790  | 64.281  |
| 2     | 21.717    | 10368290 | 102156 | 50.210  | 35.719  |
| Total |           | 20649928 | 285999 | 100.000 | 100.000 |

**<Chromatogram>**

mV

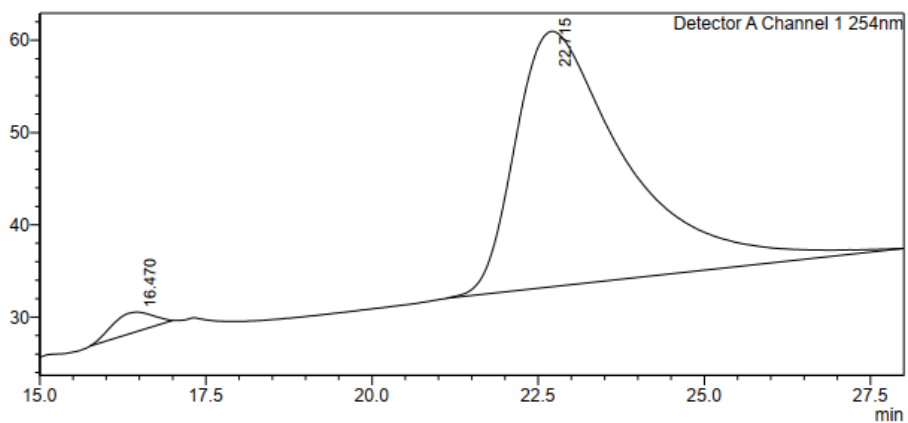

| Peak# | Ret. Time | Area    | Height | Area%   | Height% |
|-------|-----------|---------|--------|---------|---------|
| 1     | 16.470    | 94051   | 2089   | 2.839   | 7.023   |
| 2     | 22.715    | 3218687 | 27658  | 97.161  | 92.977  |
| Total |           | 3312738 | 29747  | 100.000 | 100.000 |

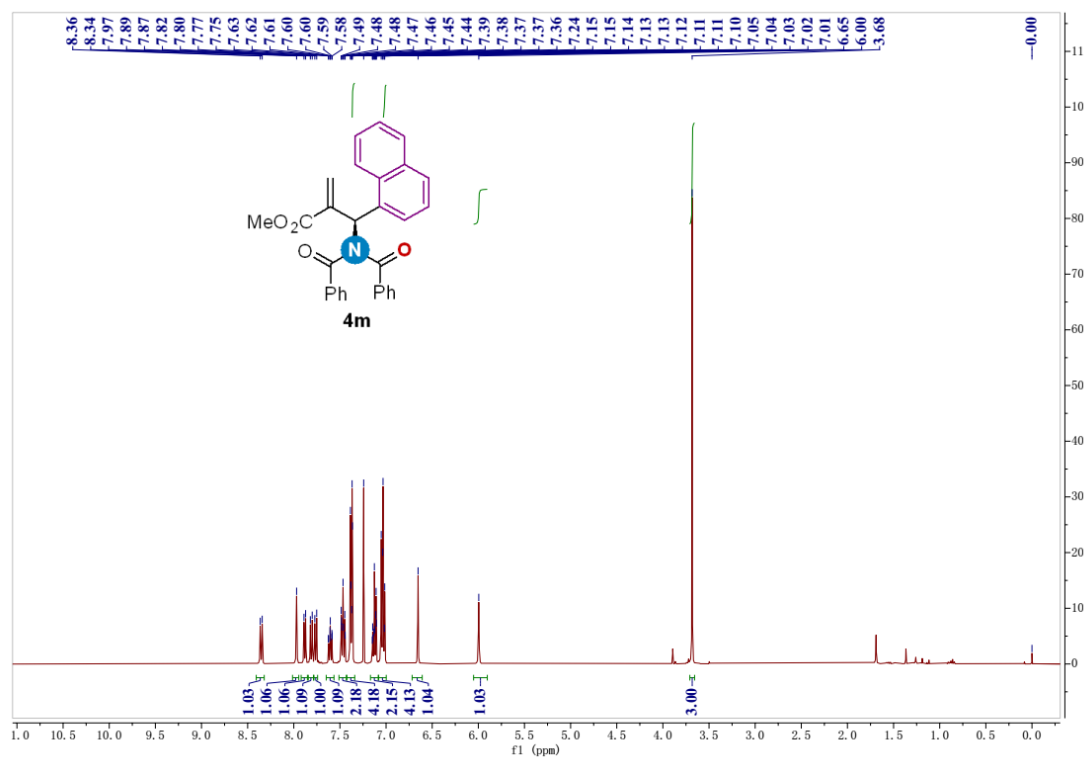

<sup>1</sup>H NMR spectrum of **4m** (400 MHz, CDCl<sub>3</sub>)

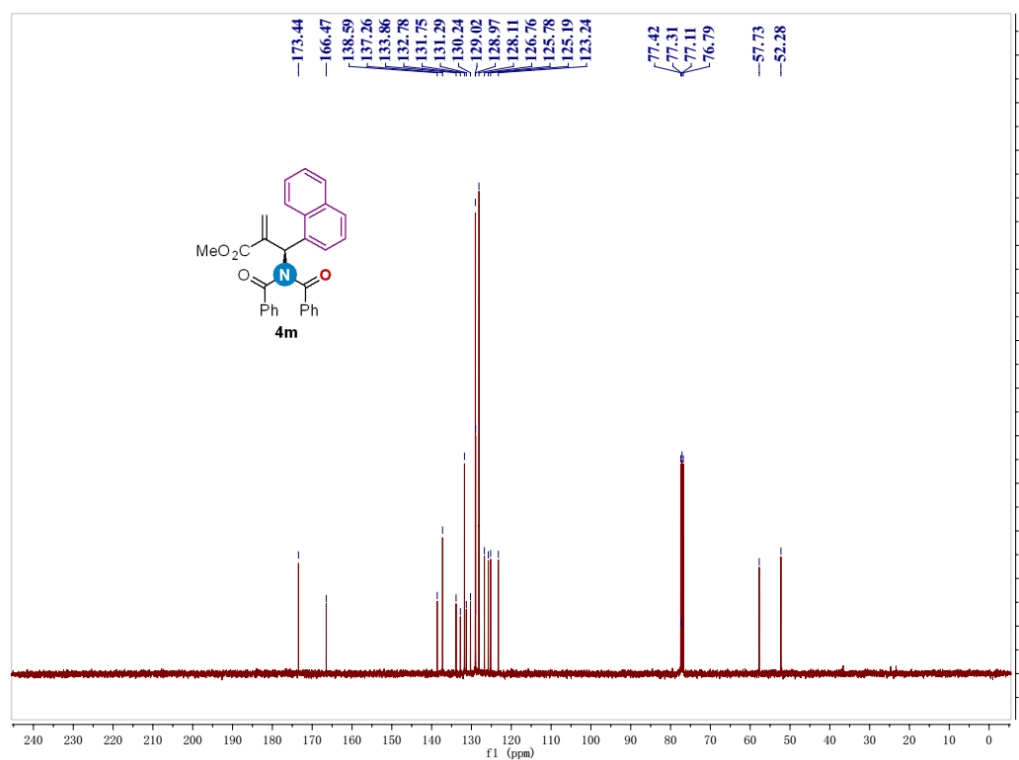

<sup>13</sup>C NMR spectrum of **4m** (100 MHz, CDCl<sub>3</sub>)

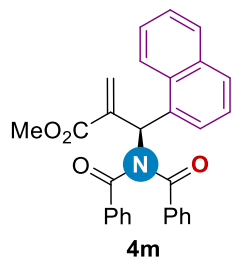

**<Chromatogram>**

mV

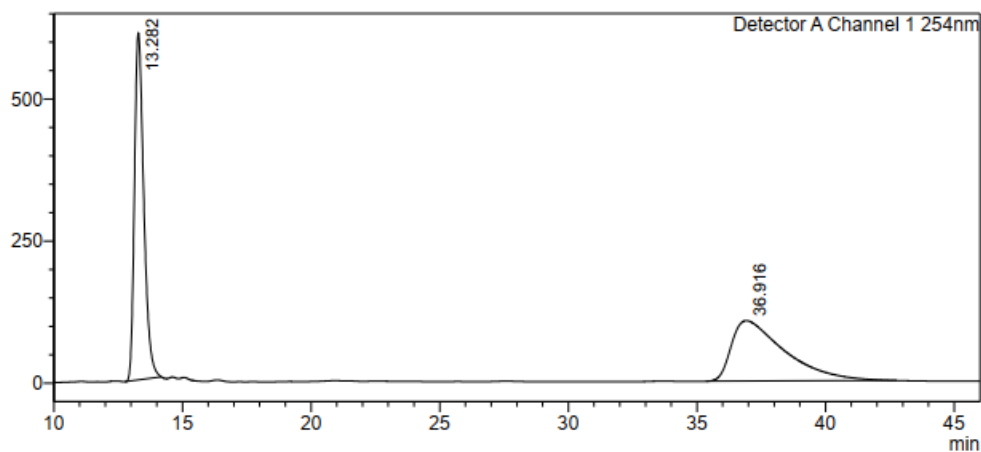

| Peak# | Ret. Time | Area     | Height | Area%   | Height% |
|-------|-----------|----------|--------|---------|---------|
| 1     | 13.282    | 15377595 | 610311 | 50.146  | 85.159  |
| 2     | 36.916    | 15287834 | 106358 | 49.854  | 14.841  |
| Total |           | 30665429 | 716668 | 100.000 | 100.000 |

**<Chromatogram>**

mV

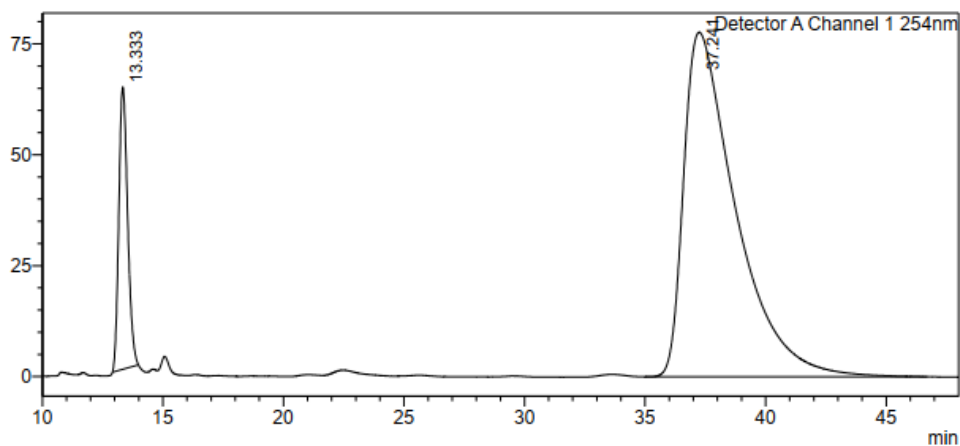

| Peak# | Ret. Time | Area     | Height | Area%   | Height% |
|-------|-----------|----------|--------|---------|---------|
| 1     | 13.333    | 1615006  | 63635  | 12.179  | 45.034  |
| 2     | 37.241    | 11645369 | 77669  | 87.821  | 54.966  |
| Total |           | 13260374 | 141304 | 100.000 | 100.000 |

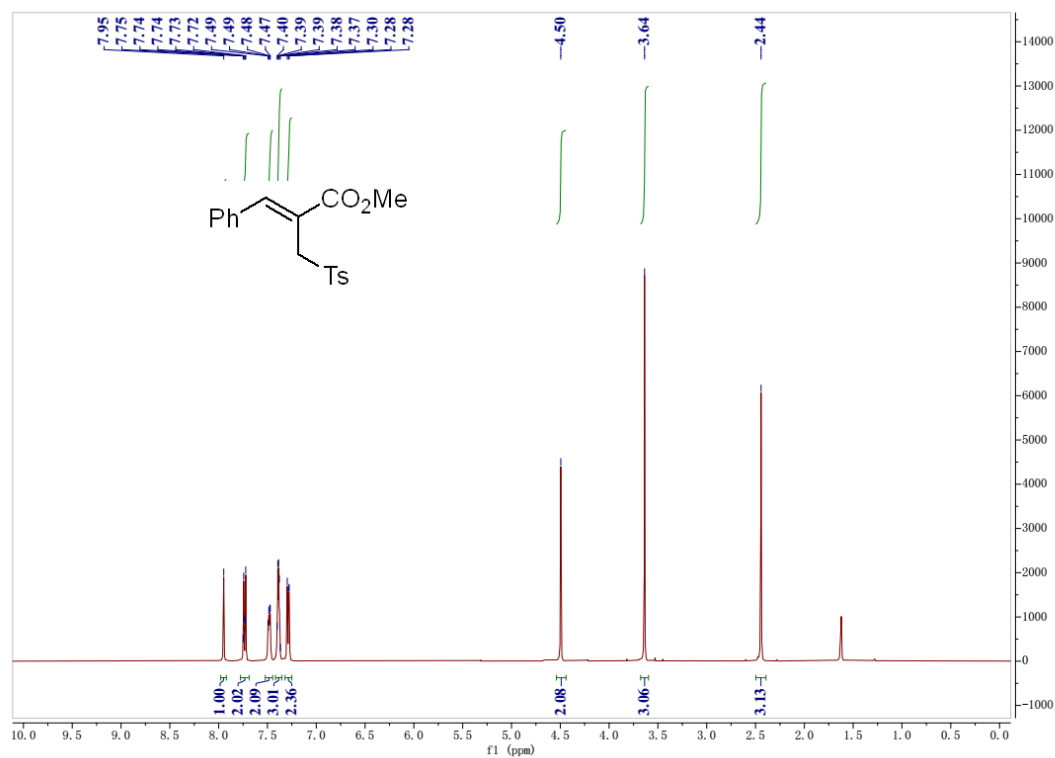

$^1\text{H}$  NMR spectrum of **6** (400 MHz,  $\text{CDCl}_3$ )

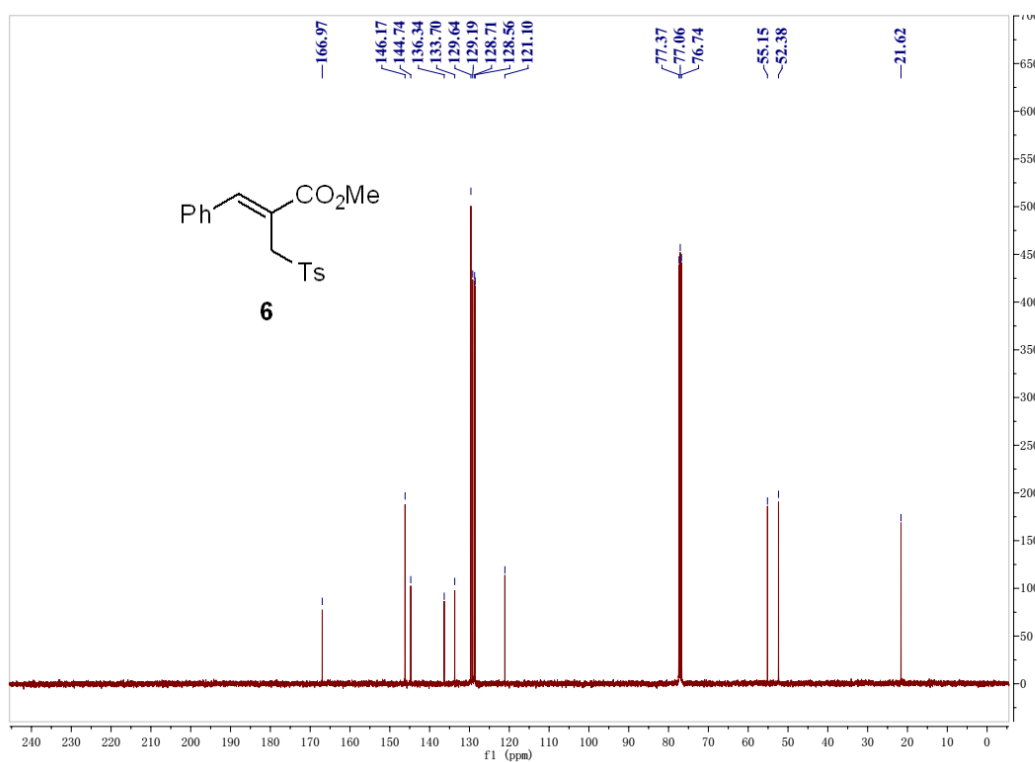

$^{13}\text{C}$  NMR spectrum of **6** (100 MHz,  $\text{CDCl}_3$ )

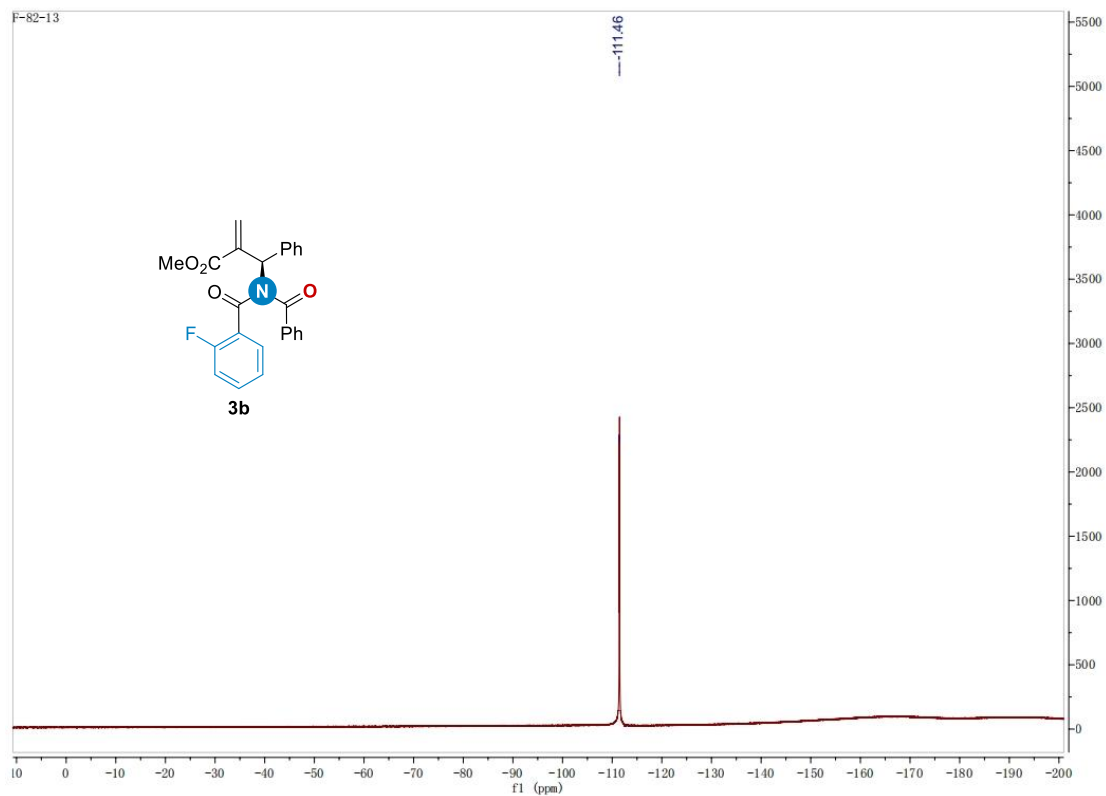

$^{19}\text{F}$  NMR spectrum of **3b** (376 MHz,  $\text{CDCl}_3$ )

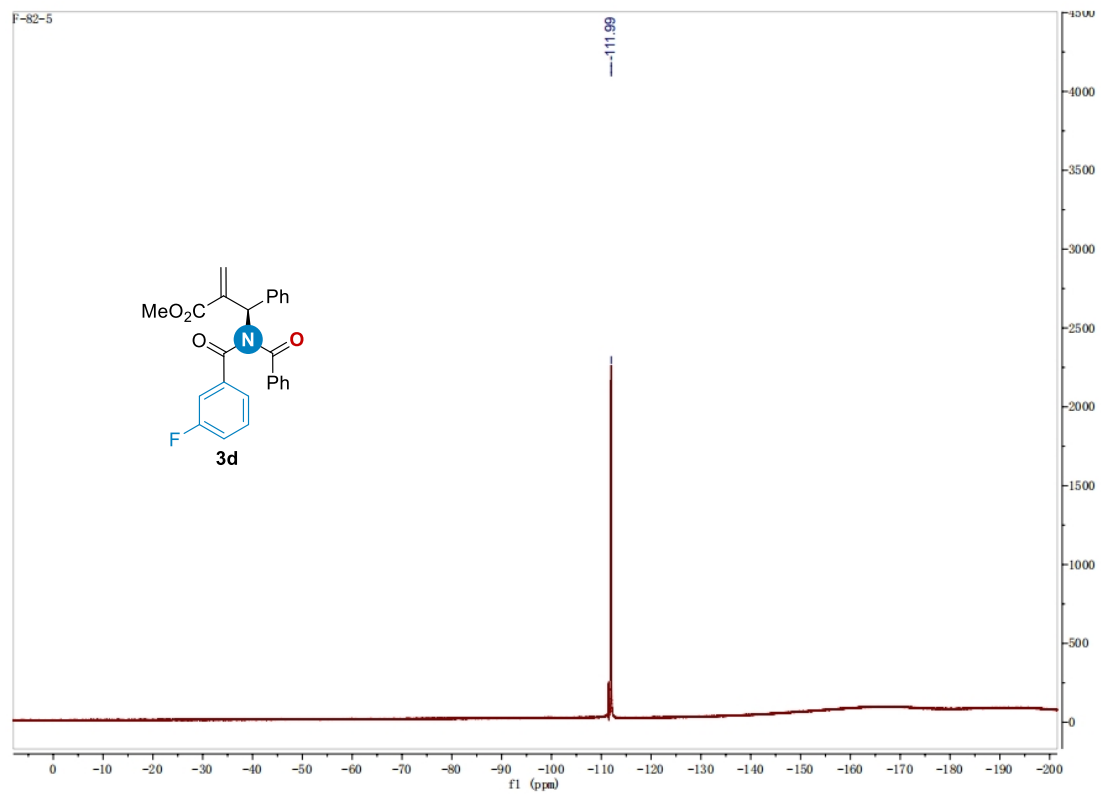

$^{19}\text{F}$  NMR spectrum of **3d** (376 MHz,  $\text{CDCl}_3$ )

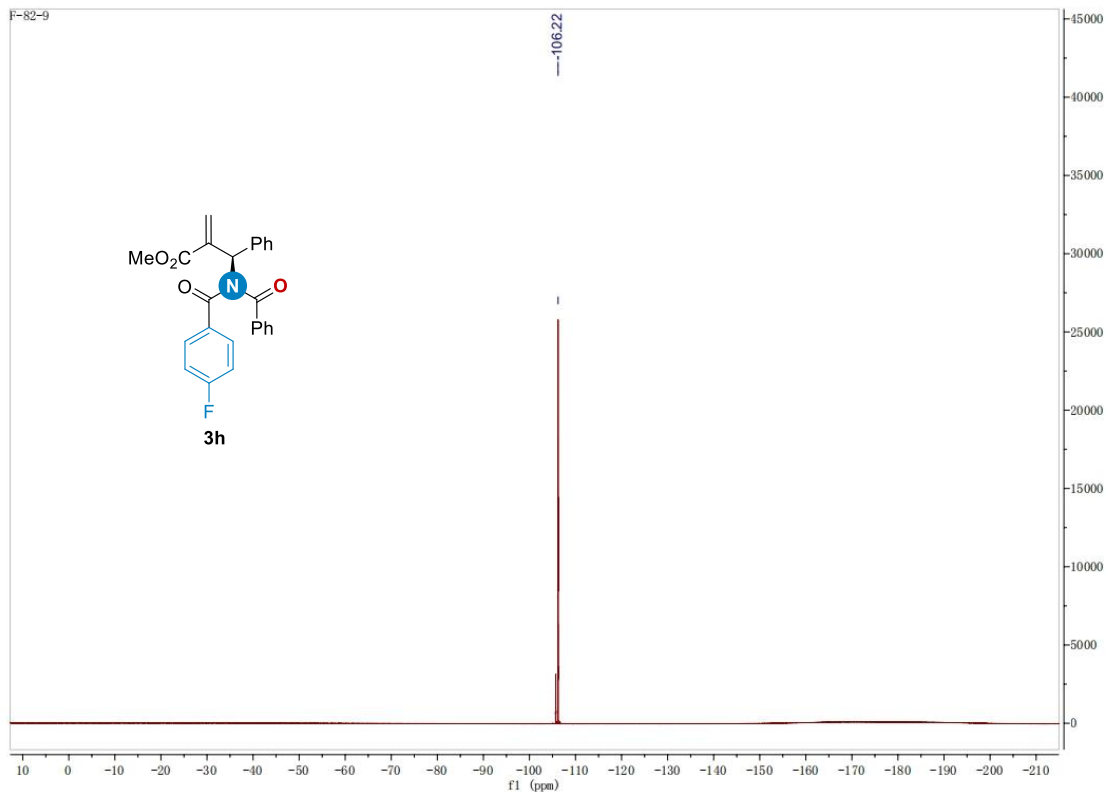

$^{19}\text{F}$  NMR spectrum of **3h** (376 MHz,  $\text{CDCl}_3$ )

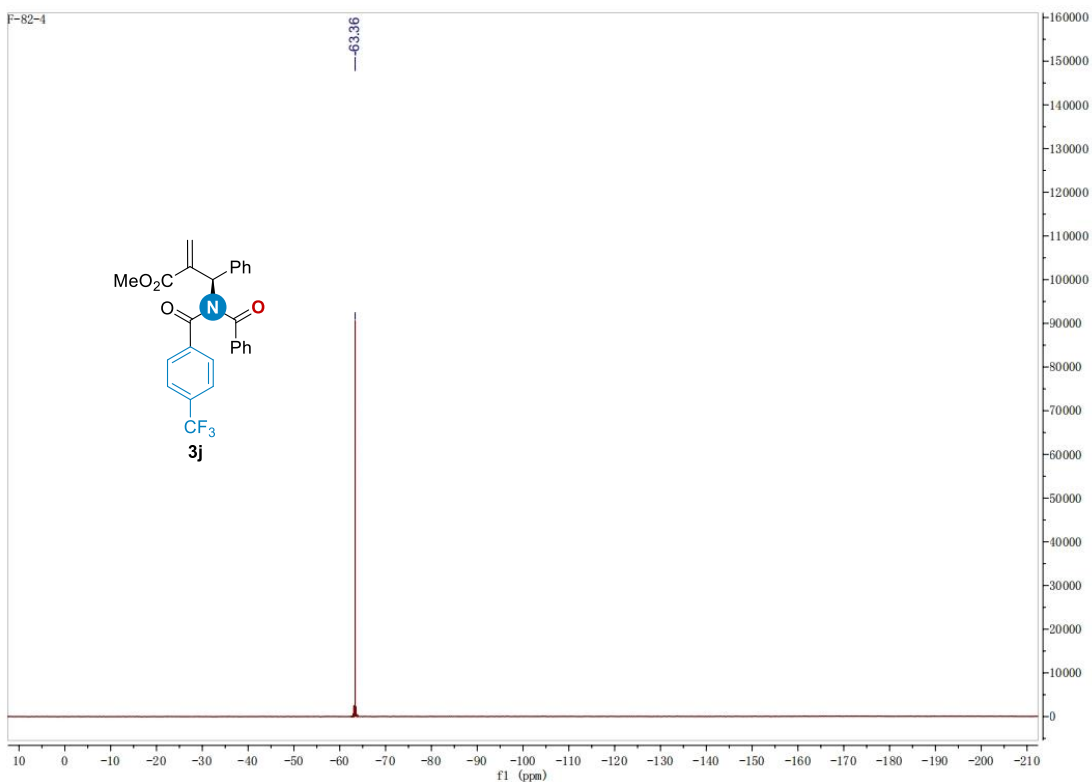

$^{19}\text{F}$  NMR spectrum of **3j** (376 MHz,  $\text{CDCl}_3$ )

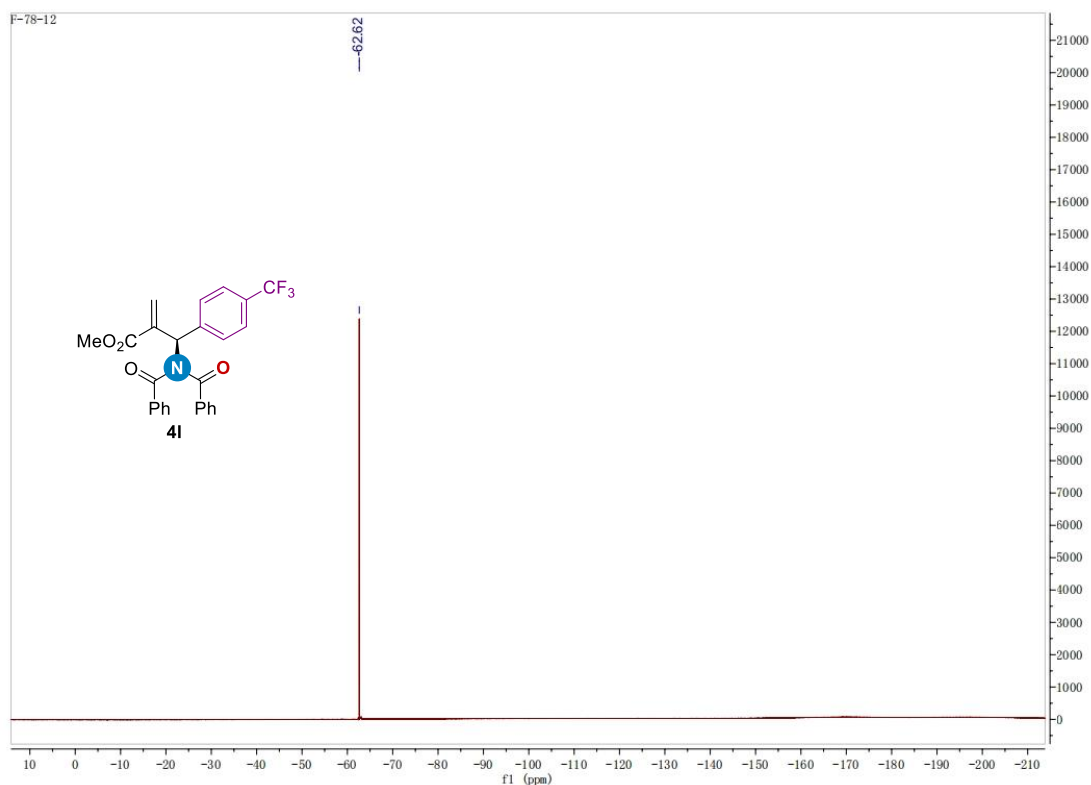

$^{19}\text{F}$  NMR spectrum of **4I** (376 MHz,  $\text{CDCl}_3$ )

## 8. References

- [1] (a) Bortolini, O.; Chiappe, C.; Fogagnolo, M.; Giovannini, P. P.; Massi, A.; Pomelli, C. S.; Ragno, D. An Insight into the Mechanism of the Aerobic Oxidation of Aldehydes Catalyzed by N-Heterocyclic Carbenes. *Chem. Commun.* **2014**, 50, 2008. (b) Bortolini, O.; Chiappe, C.; Fogagnolo, M.; Massi, A.; Pomelli, C. S. Formation, Oxidation, and Fate of the Breslow Intermediate in the N-Heterocyclic Carbene-Catalyzed Aerobic Oxidation of Aldehydes. *J. Org. Chem.* **2017**, 82, 302. (c) Jin, Z.; Xu, J.; Yang, S.; Song, B.-A.; Chi, Y. R. Enantioselective Sulfonation of Enones with Sulfonyl Imines by Cooperative N-Heterocyclic-Carbene/Thiourea/Tertiary-Amine Multicatalysis. *Angew. Chem. Int. Ed.* **2013**, 52, 12354.
